# Supplementary material for: Preparation, thermal stability and electrical transport properties of vaesite, NiS 2
Source: PeerJ journal article supplement (doi:10.7717/peerj-matsci.2), 2019-11-15
Supplement: EDS_NiS2_700C_56MPa_1.5h-2.docx [file EDS_NiS2_700C_56MPa_1.5h-2.docx]

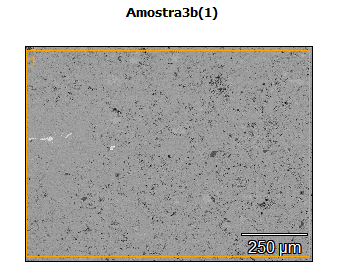


Image Name: NiS2#1952-1_HP2

Image Resolution: 1024 by 768

Image Pixel Size: 1.07 µm

Acc. Voltage: 15.0 kV

Magnification: 119


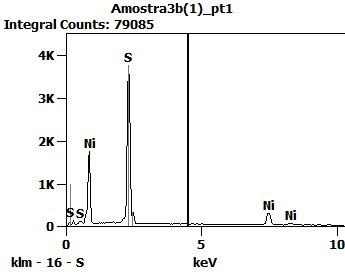


Weight %

|  | ***S*** | ***Ni*** |
| --- | --- | --- |
| ***Amostra3b(1)_pt1*** | 52.86 | 47.14 |

Atom %

|  | ***S*** | ***Ni*** |
| --- | --- | --- |
| ***Amostra3b(1)_pt1*** | 67.25 | 32.75 |
