# Supplementary material for: Preparation, thermal stability and electrical transport properties of vaesite, NiS 2
Source: PeerJ journal article supplement (doi:10.7717/peerj-matsci.2), 2019-11-15
Supplement: EDS_NiS2_700C_56MPa_1.5h-3.docx [file EDS_NiS2_700C_56MPa_1.5h-3.docx]

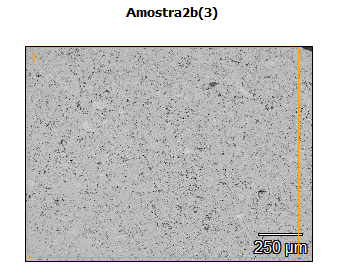


Image Name: NiS2#1952-1_HP2

Image Resolution: 1024 by 768

Image Pixel Size: 1.61 µm

Acc. Voltage: 15.0 kV

Magnification: 80


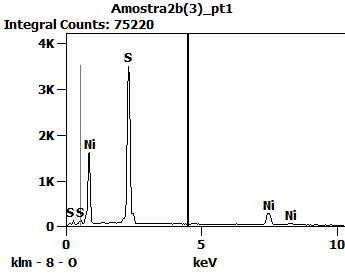


Weight %

|  | ***S*** | ***Ni*** |
| --- | --- | --- |
| ***Amostra2b(3)_pt1*** | 51.62 | 48.38 |

Atom %

|  | ***S*** | ***Ni*** |
| --- | --- | --- |
| ***Amostra2b(3)_pt1*** | 66.15 | 33.85 |
