# Supplementary material for: Preparation, thermal stability and electrical transport properties of vaesite, NiS 2
Source: PeerJ journal article supplement (doi:10.7717/peerj-matsci.2), 2019-11-15
Supplement: EDS_NiS2_720C_56MPa_1.5h-1.docx [file EDS_NiS2_720C_56MPa_1.5h-1.docx]

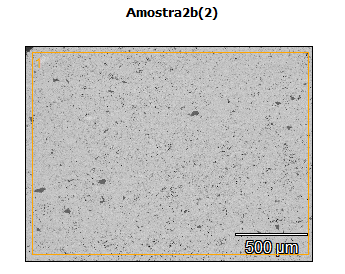


Image Name: NiS2#1928-2_HP2

Image Resolution: 1024 by 768

Image Pixel Size: 1.98 µm

Acc. Voltage: 15.0 kV

Magnification: 65


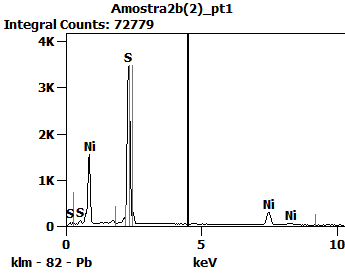


Weight %

|  | ***S*** | ***Ni*** |
| --- | --- | --- |
| ***Amostra2b(2)_pt1*** | 52.56 | 47.44 |

Atom %

|  | ***S*** | ***Ni*** |
| --- | --- | --- |
| ***Amostra2b(2)_pt1*** | 66.98 | 33.02 |
