# Supplementary material for: Preparation, thermal stability and electrical transport properties of vaesite, NiS 2
Source: PeerJ journal article supplement (doi:10.7717/peerj-matsci.2), 2019-11-15
Supplement: Porosity_analysis_NiS2.xlsx [file Porosity_analysis_NiS2.xlsx]

## Sheet: NiS2_HP_700_56_1.5
		Count	Total Area	Average Size	% Area	Mean
	NiS2#1952-1_HP2 2.tif (green)	3129	0.743	0.0002376	4.784	255		Average	SD
	NiS2#1952-1_HP2 2.tif (red)	3186	0.759	0.0002383	4.885	255		5.60438	0.71664
	NiS2#1952-1_HP2 4.tif (blue)	5373	0.967	0.0001799	6.495	255
	NiS2#1952-1_HP2 4.tif (green)	3713	0.726	0.0001956	4.878	255
	NiS2#1952-1_HP2 4.tif (red)	4168	0.794	0.0001904	5.333	255
	NiS2#1952-1_HP2 3.tif (blue)	4094	1.008	0.0002462	6.639	255
	NiS2#1952-1_HP2 3.tif (green)	3262	0.842	0.0002581	5.546	255
	NiS2#1952-1_HP2 3.tif (red)	3806	0.953	0.0002503	6.275	255

## Sheet: NiS2_HP_720_56_1.5
		Count	Total Area	Average Size	% Area	Mean
	NiS2#1928-2_HP 4.tif (blue)	2820	0.941	0.0003336	6.243	255		Average	SD
	NiS2#1928-2_HP 4.tif (green)	2889	0.959	0.0003319	6.363	255		5.77775	0.798556
	NiS2#1928-2_HP 4.tif (red)	2418	0.795	0.0003286	5.273	255
	NiS2#1928-2_HP 3.tif (red)	3529	1.04	0.0002946	6.708	255
	NiS2#1928-2_HP 3.tif (green)	2933	0.872	0.0002972	5.624	255
	NiS2#1928-2_HP 2.tif (blue)	3254	1.059	0.0003255	6.678	255
	NiS2#1928-2_HP 2.tif (green)	2309	0.701	0.0003038	4.423	255
	NiS2#1928-2_HP 2.tif (red)	2509	0.779	0.0003104	4.91	255

## Sheet: NiS2_HP_750_56_1.5
		Count	Total Area	Average Size	% Area	Mean
	NiS2#1952-3_HP2 2.tif (blue)	3862	0.688	0.0001783	4.511	255		Average	SD
	NiS2#1952-3_HP2 2.tif (green)	5640	0.949	0.0001683	6.219	255		4.23633	1.28786
	NiS2#1952-3_HP2 2.tif (red)	4068	0.727	0.0001788	4.766	255
	NiS2#1952-3_HP2 1.tif (red)	5711	0.308	5.394e-05	2.877	255
	NiS2#1952-3_HP2 1.tif (green)	6166	0.344	5.583e-05	3.216	255
	NiS2#1952-3_HP2 1.tif (blue)	5297	0.277	5.238e-05	2.592	255
	NiS2#1952-3_HP2 1.tif (red)	5711	0.308	5.394e-05	4.511	255
	NiS2#1952-3_HP2 1.tif (green)	6166	0.344	5.583e-05	6.219	255
	NiS2#1952-3_HP2 1.tif (blue)	5297	0.277	5.238e-05	3.216	255
