# Supplementary material for: Preparation, thermal stability and electrical transport properties of vaesite, NiS 2
Source: PeerJ journal article supplement (doi:10.7717/peerj-matsci.2), 2019-11-15
Supplement: TGA_NiS2_as-synthesized.xlsx [file TGA_NiS2_as-synthesized.xlsx]

## Sheet: T-1928-2
Run	428
Module	TGA
Sample	#1928-2_hp
Size	7.443	mg
Method	GERAL	(Polimeros	I)
Operator	MHC
Comment	Air	60ml/min
Nsig	3
Sig1	Time	(min)
Sig2	Temperature	(øC)
Sig3	Weight	(mg)
Kcell	1
Calib	0
Date	2019-03-20
Time	10:49:00			%Mass
_x000C_	0.0333333	20.3876	7.44873	100.077
	0.0766667	20.4792	7.44815	100.069
	0.12	20.5734	7.44892	100.08
	0.163333	20.67	7.44915	100.083
	0.206667	20.7779	7.44969	100.09
	0.25	20.8942	7.44915	100.083
	0.293333	21.0136	7.45008	100.095
	0.336667	21.1451	7.45038	100.099
	0.38	21.2911	7.45061	100.102
	0.423333	21.4507	7.451	100.107
	0.466667	21.618	7.45123	100.111
	0.51	21.7913	7.45138	100.113
	0.553333	21.9783	7.452	100.121
	0.596667	22.1813	7.45192	100.12
	0.64	22.3881	7.45262	100.129
	0.683333	22.6085	7.45346	100.141
	0.726667	22.8381	7.45308	100.135
	0.77	23.076	7.45338	100.139
	0.813333	23.3239	7.45331	100.139
	0.856667	23.5846	7.45423	100.151
	0.9	23.8454	7.45431	100.152
	0.943333	24.1198	7.45446	100.154
	0.986667	24.4057	7.45438	100.153
	1.03	24.6915	7.45431	100.152
	1.07333	24.9903	7.455	100.161
	1.11667	25.2959	7.45508	100.162
	1.16	25.6071	7.45462	100.156
	1.20333	25.9237	7.45438	100.153
	1.24667	26.247	7.45454	100.155
	1.29	26.5771	7.45431	100.152
	1.33333	26.9126	7.45492	100.16
	1.37667	27.2458	7.45546	100.167
	1.42	27.5956	7.45523	100.164
	1.46333	27.9439	7.45515	100.163
	1.50667	28.299	7.45577	100.172
	1.55	28.6587	7.45592	100.174
	1.59333	29.0184	7.45615	100.177
	1.63667	29.3796	7.45615	100.177
	1.68	29.7453	7.45661	100.183
	1.72333	30.1156	7.45746	100.194
	1.76667	30.4934	7.45785	100.2
	1.81	30.8683	7.45777	100.198
	1.85333	31.2491	7.45685	100.186
	1.89667	31.633	7.457	100.188
	1.94	32.0122	7.45685	100.186
	1.98333	32.4013	7.45715	100.19
	2.02667	32.7912	7.45708	100.189
	2.07	33.1803	7.45669	100.184
	2.11333	33.5747	7.457	100.188
	2.15667	33.9721	7.45692	100.187
	2.2	34.3695	7.45708	100.189
	2.24333	34.7646	7.45685	100.186
	2.28667	35.1643	7.45692	100.187
	2.33	35.5669	7.45677	100.185
	2.37333	35.968	7.45685	100.186
	2.41667	36.3692	7.45638	100.18
	2.46	36.7748	7.45646	100.181
	2.50333	37.1775	7.45654	100.182
	2.54667	37.5786	7.456	100.175
	2.59	37.985	7.45631	100.179
	2.63333	38.3914	7.45661	100.183
	2.67667	38.7971	7.45685	100.186
	2.72	39.208	7.45631	100.179
	2.76333	39.6114	7.45608	100.176
	2.80667	40.017	7.45669	100.184
	2.85	40.4227	7.45692	100.187
	2.89333	40.8313	7.45646	100.181
	2.93667	41.237	7.45646	100.181
	2.98	41.6441	7.45654	100.182
	3.02333	42.0528	7.45769	100.197
	3.06667	42.4577	7.457	100.188
	3.11	42.8618	7.45685	100.186
	3.15333	43.2742	7.456	100.175
	3.19667	43.6889	7.45623	100.178
	3.24	44.0908	7.45577	100.172
	3.28333	44.5046	7.45608	100.176
	3.32667	44.9161	7.45592	100.174
	3.37	45.3232	7.45631	100.179
	3.41333	45.7257	7.456	100.175
	3.45667	46.1349	7.45569	100.17
	3.5	46.5502	7.45508	100.162
	3.54333	46.9722	7.45554	100.168
	3.58667	47.3844	7.45585	100.173
	3.63	47.8034	7.456	100.175
	3.67333	48.2187	7.456	100.175
	3.71667	48.6369	7.45585	100.173
	3.76	49.0537	7.45554	100.168
	3.80333	49.4659	7.45577	100.172
	3.84667	49.8774	7.45592	100.174
	3.89	50.2927	7.45608	100.176
	3.93333	50.702	7.45554	100.168
	3.97667	51.1142	7.45585	100.173
	4.02	51.5265	7.45562	100.17
	4.06333	51.9365	7.45623	100.178
	4.10667	52.3442	7.45623	100.178
	4.15	52.7595	7.45631	100.179
	4.19333	53.1725	7.45654	100.182
	4.23667	53.5818	7.45638	100.18
	4.28	53.9903	7.45638	100.18
	4.32333	54.4003	7.45508	100.162
	4.36667	54.8163	7.45454	100.155
	4.41	55.2293	7.45369	100.144
	4.45333	55.6415	7.45423	100.151
	4.49667	56.0598	7.45415	100.15
	4.54	56.472	7.45431	100.152
	4.58333	56.8869	7.45515	100.163
	4.62667	57.2966	7.45515	100.163
	4.67	57.7078	7.45477	100.158
	4.71333	58.1182	7.45492	100.16
	4.75667	58.5309	7.45392	100.147
	4.8	58.9398	7.45354	100.142
	4.84333	59.3547	7.45346	100.141
	4.88667	59.7681	7.45354	100.142
	4.93	60.1785	7.45369	100.144
	4.97333	60.586	7.45338	100.139
	5.01667	61.0031	7.45346	100.141
	5.06	61.4143	7.45331	100.139
	5.10333	61.8247	7.45215	100.123
	5.14667	62.2359	7.45292	100.133
	5.19	62.647	7.45292	100.133
	5.23333	63.0604	7.453	100.134
	5.27667	63.4731	7.45169	100.117
	5.32	63.8858	7.45061	100.102
	5.36333	64.2969	7.45054	100.101
	5.40667	64.7111	7.45069	100.103
	5.45	65.1252	7.45031	100.098
	5.49333	65.5401	7.44938	100.086
	5.53667	65.9587	7.44931	100.085
	5.58	66.3721	7.449	100.081
	5.62333	66.7877	7.449	100.081
	5.66667	67.1996	7.449	100.081
	5.71	67.6086	7.449	100.081
	5.75333	68.0264	7.44762	100.062
	5.79667	68.4369	7.44738	100.059
	5.84	68.8554	7.448	100.067
	5.88333	69.2711	7.44692	100.053
	5.92667	69.6829	7.447	100.054
	5.97	70.0968	7.44669	100.05
	6.01333	70.507	7.44669	100.05
	6.05667	70.9203	7.44677	100.051
	6.1	71.3349	7.44585	100.038
	6.14333	71.7496	7.44415	100.015
	6.18667	72.1606	7.44369	100.009
	6.23	72.5716	7.44354	100.007
	6.27333	72.984	7.44269	99.9958
	6.31667	73.4002	7.44269	99.9958
	6.36	73.8134	7.44246	99.9927
	6.40333	74.2266	7.44277	99.9969
	6.44667	74.6383	7.44115	99.9751
	6.49	75.056	7.441	99.9731
	6.53333	75.4753	7.44138	99.9782
	6.57667	75.8953	7.44069	99.969
	6.62	76.3124	7.44008	99.9608
	6.66333	76.7318	7.44	99.9597
	6.70667	77.1555	7.43954	99.9535
	6.75	77.5801	7.439	99.9463
	6.79333	78.0016	7.43885	99.9442
	6.83667	78.4143	7.43877	99.9432
	6.88	78.8344	7.43831	99.937
	6.92333	79.253	7.43854	99.9401
	6.96667	79.6738	7.43862	99.9412
	7.01	80.0939	7.43885	99.9442
	7.05333	80.511	7.43762	99.9277
	7.09667	80.9311	7.43762	99.9277
	7.14	81.3482	7.43715	99.9214
	7.18333	81.7727	7.437	99.9194
	7.22667	82.1987	7.43669	99.9152
	7.27	82.6158	7.43615	99.908
	7.31333	83.0448	7.436	99.906
	7.35667	83.4649	7.43562	99.9008
	7.4	83.8828	7.43569	99.9018
	7.44333	84.308	7.43585	99.9039
	7.48667	84.7244	7.43638	99.9111
	7.53	85.146	7.43669	99.9152
	7.57333	85.5675	7.43661	99.9141
	7.61667	85.9883	7.43638	99.9111
	7.66	86.4025	7.43615	99.908
	7.70333	86.8233	7.43577	99.9029
	7.74667	87.2463	7.43454	99.8863
	7.79	87.6699	7.43423	99.8822
	7.83333	88.0875	7.43492	99.8914
	7.87667	88.5022	7.43477	99.8894
	7.92	88.9221	7.43338	99.8708
	7.96333	89.3367	7.43408	99.8802
	8.00667	89.7558	7.43523	99.8956
	8.05	90.1727	7.43392	99.878
	8.09333	90.5948	7.43392	99.878
	8.13667	91.0176	7.43392	99.878
	8.18	91.436	7.434	99.8791
	8.22333	91.8595	7.43369	99.8749
	8.26667	92.2853	7.43315	99.8677
	8.31	92.7081	7.43285	99.8636
	8.35333	93.1295	7.43238	99.8573
	8.39667	93.553	7.43177	99.8491
	8.44	93.9777	7.43231	99.8564
	8.48333	94.4009	7.43262	99.8605
	8.52667	94.8235	7.43285	99.8636
	8.57	95.249	7.43192	99.8511
	8.61333	95.6707	7.43215	99.8542
	8.65667	96.0977	7.43262	99.8605
	8.7	96.5218	7.43262	99.8605
	8.74333	96.9458	7.43154	99.846
	8.78667	97.3728	7.431	99.8388
	8.83	97.7983	7.43161	99.847
	8.87333	98.2253	7.43161	99.847
	8.91667	98.6523	7.43115	99.8408
	8.96	99.0755	7.43169	99.848
	9.00333	99.5107	7.43169	99.848
	9.04667	99.937	7.43085	99.8368
	9.09	100.362	7.43123	99.8419
	9.13333	100.792	7.43108	99.8398
	9.17667	101.218	7.43146	99.845
	9.22	101.652	7.43161	99.847
	9.26333	102.077	7.43138	99.8439
	9.30667	102.51	7.43138	99.8439
	9.35	102.944	7.43123	99.8419
	9.39333	103.375	7.43169	99.848
	9.43667	103.805	7.43223	99.8553
	9.48	104.238	7.43108	99.8398
	9.52333	104.669	7.43092	99.8377
	9.56667	105.097	7.43138	99.8439
	9.61	105.531	7.43169	99.848
	9.65333	105.957	7.43085	99.8368
	9.69667	106.387	7.43038	99.8304
	9.74	106.817	7.42985	99.8233
	9.78333	107.245	7.42962	99.8202
	9.82667	107.674	7.42954	99.8192
	9.87	108.11	7.42938	99.817
	9.91333	108.546	7.43023	99.8284
	9.95667	108.982	7.43054	99.8326
	10	109.415	7.43123	99.8419
	10.0433	109.844	7.43092	99.8377
	10.0867	110.276	7.42985	99.8233
	10.13	110.709	7.43062	99.8337
	10.1733	111.142	7.43	99.8253
	10.2167	111.575	7.42954	99.8192
	10.26	112.011	7.42808	99.7995
	10.3033	112.452	7.42792	99.7974
	10.3467	112.888	7.42808	99.7995
	10.39	113.327	7.42815	99.8005
	10.4333	113.769	7.42815	99.8005
	10.4767	114.213	7.42815	99.8005
	10.52	114.649	7.42808	99.7995
	10.5633	115.092	7.42808	99.7995
	10.6067	115.529	7.428	99.7985
	10.65	115.969	7.42769	99.7943
	10.6933	116.407	7.42738	99.7901
	10.7367	116.843	7.42815	99.8005
	10.78	117.283	7.42792	99.7974
	10.8233	117.721	7.42823	99.8016
	10.8667	118.164	7.428	99.7985
	10.91	118.603	7.42762	99.7934
	10.9533	119.037	7.42754	99.7923
	10.9967	119.463	7.42723	99.7881
	11.04	119.901	7.42669	99.7809
	11.0833	120.334	7.42662	99.7799
	11.1267	120.769	7.42669	99.7809
	11.17	121.209	7.42715	99.787
	11.2133	121.645	7.42677	99.7819
	11.2567	122.077	7.427	99.785
	11.3	122.513	7.42708	99.7861
	11.3433	122.946	7.42746	99.7912
	11.3867	123.382	7.42746	99.7912
	11.43	123.822	7.42631	99.7758
	11.4733	124.263	7.42615	99.7736
	11.5167	124.702	7.42631	99.7758
	11.56	125.151	7.42746	99.7912
	11.6033	125.598	7.42723	99.7881
	11.6467	126.045	7.42708	99.7861
	11.69	126.491	7.42685	99.783
	11.7333	126.941	7.42631	99.7758
	11.7767	127.386	7.42569	99.7674
	11.82	127.824	7.42546	99.7643
	11.8633	128.271	7.42623	99.7747
	11.9067	128.719	7.42685	99.783
	11.95	129.163	7.42654	99.7789
	11.9933	129.607	7.42646	99.7778
	12.0367	130.047	7.42669	99.7809
	12.08	130.49	7.42685	99.783
	12.1233	130.932	7.42608	99.7727
	12.1667	131.376	7.42508	99.7592
	12.21	131.825	7.42508	99.7592
	12.2533	132.262	7.42485	99.7561
	12.2967	132.701	7.42531	99.7623
	12.34	133.14	7.42554	99.7654
	12.3833	133.584	7.42508	99.7592
	12.4267	134.03	7.42454	99.752
	12.47	134.474	7.42354	99.7385
	12.5133	134.923	7.42331	99.7355
	12.5567	135.368	7.42477	99.7551
	12.6	135.817	7.42423	99.7478
	12.6433	136.265	7.42377	99.7416
	12.6867	136.713	7.42331	99.7355
	12.73	137.162	7.42362	99.7396
	12.7733	137.612	7.42346	99.7375
	12.8167	138.063	7.423	99.7313
	12.86	138.512	7.42323	99.7344
	12.9033	138.953	7.42292	99.7302
	12.9467	139.399	7.42277	99.7282
	12.99	139.849	7.42262	99.7262
	13.0333	140.301	7.42277	99.7282
	13.0767	140.75	7.42285	99.7293
	13.12	141.199	7.42262	99.7262
	13.1633	141.647	7.42192	99.7168
	13.2067	142.097	7.42108	99.7055
	13.25	142.552	7.42192	99.7168
	13.2933	143.005	7.42131	99.7086
	13.3367	143.45	7.42192	99.7168
	13.38	143.898	7.42208	99.7189
	13.4233	144.348	7.42146	99.7106
	13.4667	144.8	7.42162	99.7128
	13.51	145.245	7.42177	99.7148
	13.5533	145.694	7.42192	99.7168
	13.5967	146.152	7.42138	99.7095
	13.64	146.608	7.42215	99.7199
	13.6833	147.054	7.42246	99.724
	13.7267	147.505	7.42231	99.722
	13.77	147.958	7.421	99.7044
	13.8133	148.402	7.421	99.7044
	13.8567	148.848	7.42146	99.7106
	13.9	149.297	7.42154	99.7117
	13.9433	149.745	7.422	99.7179
	13.9867	150.189	7.42146	99.7106
	14.03	150.636	7.42108	99.7055
	14.0733	151.082	7.42146	99.7106
	14.1167	151.532	7.422	99.7179
	14.16	151.98	7.421	99.7044
	14.2033	152.427	7.42077	99.7013
	14.2467	152.868	7.42038	99.6961
	14.29	153.313	7.42131	99.7086
	14.3333	153.759	7.42154	99.7117
	14.3767	154.212	7.42131	99.7086
	14.42	154.655	7.42146	99.7106
	14.4633	155.106	7.421	99.7044
	14.5067	155.554	7.42046	99.6972
	14.55	155.995	7.42015	99.693
	14.5933	156.442	7.41985	99.689
	14.6367	156.898	7.42115	99.7064
	14.68	157.35	7.42123	99.7075
	14.7233	157.799	7.42061	99.6992
	14.7667	158.25	7.42015	99.693
	14.81	158.707	7.42077	99.7013
	14.8533	159.158	7.42008	99.6921
	14.8967	159.61	7.42154	99.7117
	14.94	160.06	7.42138	99.7095
	14.9833	160.508	7.42069	99.7003
	15.0267	160.96	7.42008	99.6921
	15.07	161.41	7.41985	99.689
	15.1133	161.863	7.42031	99.6951
	15.1567	162.313	7.42015	99.693
	15.2	162.772	7.41977	99.6879
	15.2433	163.225	7.41908	99.6786
	15.2867	163.68	7.41946	99.6837
	15.33	164.138	7.41992	99.6899
	15.3733	164.598	7.42054	99.6982
	15.4167	165.05	7.42054	99.6982
	15.46	165.501	7.42077	99.7013
	15.5033	165.951	7.42092	99.7033
	15.5467	166.4	7.41969	99.6868
	15.59	166.847	7.42069	99.7003
	15.6333	167.298	7.42108	99.7055
	15.6767	167.743	7.42038	99.6961
	15.72	168.195	7.42069	99.7003
	15.7633	168.649	7.42108	99.7055
	15.8067	169.105	7.42123	99.7075
	15.85	169.553	7.42146	99.7106
	15.8933	169.998	7.42108	99.7055
	15.9367	170.457	7.42	99.691
	15.98	170.91	7.42077	99.7013
	16.0233	171.365	7.42046	99.6972
	16.0667	171.814	7.42008	99.6921
	16.11	172.269	7.42177	99.7148
	16.1533	172.716	7.42077	99.7013
	16.1967	173.167	7.421	99.7044
	16.24	173.613	7.42077	99.7013
	16.2833	174.067	7.42061	99.6992
	16.3267	174.524	7.42092	99.7033
	16.37	174.973	7.42061	99.6992
	16.4133	175.429	7.41985	99.689
	16.4567	175.884	7.42115	99.7064
	16.5	176.339	7.42154	99.7117
	16.5433	176.793	7.42169	99.7137
	16.5867	177.243	7.42223	99.7209
	16.63	177.703	7.42208	99.7189
	16.6733	178.16	7.42208	99.7189
	16.7167	178.613	7.42208	99.7189
	16.76	179.069	7.42192	99.7168
	16.8033	179.525	7.423	99.7313
	16.8467	179.983	7.42308	99.7324
	16.89	180.442	7.42254	99.7251
	16.9333	180.895	7.42215	99.7199
	16.9767	181.348	7.422	99.7179
	17.02	181.796	7.42238	99.723
	17.0633	182.255	7.42338	99.7364
	17.1067	182.711	7.42338	99.7364
	17.15	183.166	7.42338	99.7364
	17.1933	183.618	7.42323	99.7344
	17.2367	184.072	7.42308	99.7324
	17.28	184.527	7.42346	99.7375
	17.3233	184.986	7.42331	99.7355
	17.3667	185.444	7.42354	99.7385
	17.41	185.893	7.42354	99.7385
	17.4533	186.343	7.424	99.7447
	17.4967	186.79	7.42431	99.7489
	17.54	187.239	7.42431	99.7489
	17.5833	187.696	7.42408	99.7458
	17.6267	188.154	7.42515	99.7602
	17.67	188.607	7.42523	99.7613
	17.7133	189.061	7.42477	99.7551
	17.7567	189.507	7.42408	99.7458
	17.8	189.956	7.42431	99.7489
	17.8433	190.401	7.42454	99.752
	17.8867	190.85	7.425	99.7582
	17.93	191.297	7.42515	99.7602
	17.9733	191.747	7.42492	99.7571
	18.0167	192.193	7.425	99.7582
	18.06	192.651	7.42561	99.7664
	18.1033	193.102	7.42623	99.7747
	18.1467	193.552	7.42569	99.7674
	18.19	194.003	7.42569	99.7674
	18.2333	194.453	7.42492	99.7571
	18.2767	194.907	7.42431	99.7489
	18.32	195.357	7.42492	99.7571
	18.3633	195.803	7.42615	99.7736
	18.4067	196.257	7.42554	99.7654
	18.45	196.713	7.42523	99.7613
	18.4933	197.167	7.42554	99.7654
	18.5367	197.62	7.42585	99.7696
	18.58	198.071	7.42608	99.7727
	18.6233	198.52	7.42561	99.7664
	18.6667	198.973	7.42546	99.7643
	18.71	199.427	7.42592	99.7705
	18.7533	199.879	7.42654	99.7789
	18.7967	200.34	7.42646	99.7778
	18.84	200.794	7.42685	99.783
	18.8833	201.25	7.42708	99.7861
	18.9267	201.699	7.42762	99.7934
	18.97	202.153	7.42792	99.7974
	19.0133	202.608	7.42746	99.7912
	19.0567	203.064	7.42746	99.7912
	19.1	203.521	7.42792	99.7974
	19.1433	203.979	7.42877	99.8088
	19.1867	204.44	7.42908	99.813
	19.23	204.896	7.42831	99.8026
	19.2733	205.352	7.42815	99.8005
	19.3167	205.81	7.42823	99.8016
	19.36	206.267	7.42877	99.8088
	19.4033	206.719	7.42908	99.813
	19.4467	207.172	7.42785	99.7965
	19.49	207.63	7.42785	99.7965
	19.5333	208.082	7.42823	99.8016
	19.5767	208.545	7.42785	99.7965
	19.62	208.999	7.42854	99.8057
	19.6633	209.461	7.42838	99.8036
	19.7067	209.919	7.42854	99.8057
	19.75	210.384	7.429	99.8119
	19.7933	210.837	7.42777	99.7954
	19.8367	211.298	7.42792	99.7974
	19.88	211.753	7.42892	99.8108
	19.9233	212.206	7.42938	99.817
	19.9667	212.657	7.42977	99.8222
	20.01	213.121	7.42862	99.8068
	20.0533	213.582	7.42862	99.8068
	20.0967	214.039	7.42869	99.8077
	20.14	214.495	7.42885	99.8099
	20.1833	214.946	7.429	99.8119
	20.2267	215.404	7.42846	99.8046
	20.27	215.861	7.42869	99.8077
	20.3133	216.319	7.42931	99.8161
	20.3567	216.781	7.42992	99.8243
	20.4	217.244	7.42931	99.8161
	20.4433	217.702	7.42954	99.8192
	20.4867	218.164	7.43	99.8253
	20.53	218.62	7.43	99.8253
	20.5733	219.08	7.42962	99.8202
	20.6167	219.544	7.42892	99.8108
	20.66	220.003	7.42885	99.8099
	20.7033	220.468	7.42923	99.815
	20.7467	220.931	7.42854	99.8057
	20.79	221.394	7.42915	99.8139
	20.8333	221.845	7.42885	99.8099
	20.8767	222.309	7.42862	99.8068
	20.92	222.77	7.429	99.8119
	20.9633	223.228	7.42892	99.8108
	21.0067	223.689	7.42938	99.817
	21.05	224.145	7.42985	99.8233
	21.0933	224.601	7.42969	99.8212
	21.1367	225.062	7.42954	99.8192
	21.18	225.523	7.42954	99.8192
	21.2233	225.982	7.42946	99.8181
	21.2667	226.445	7.42985	99.8233
	21.31	226.91	7.42985	99.8233
	21.3533	227.376	7.42977	99.8222
	21.3967	227.84	7.42954	99.8192
	21.44	228.305	7.42946	99.8181
	21.4833	228.77	7.42962	99.8202
	21.5267	229.233	7.42992	99.8243
	21.57	229.701	7.42946	99.8181
	21.6133	230.161	7.42992	99.8243
	21.6567	230.626	7.42962	99.8202
	21.7	231.09	7.42969	99.8212
	21.7433	231.547	7.42977	99.8222
	21.7867	232.006	7.42938	99.817
	21.83	232.468	7.42938	99.817
	21.8733	232.925	7.42954	99.8192
	21.9167	233.385	7.42992	99.8243
	21.96	233.844	7.42985	99.8233
	22.0033	234.3	7.42977	99.8222
	22.0467	234.757	7.42962	99.8202
	22.09	235.213	7.43015	99.8274
	22.1333	235.676	7.42962	99.8202
	22.1767	236.131	7.42992	99.8243
	22.22	236.592	7.43015	99.8274
	22.2633	237.053	7.43054	99.8326
	22.3067	237.511	7.43115	99.8408
	22.35	237.973	7.42985	99.8233
	22.3933	238.432	7.43077	99.8357
	22.4367	238.892	7.42992	99.8243
	22.48	239.353	7.43015	99.8274
	22.5233	239.815	7.43023	99.8284
	22.5667	240.269	7.43023	99.8284
	22.61	240.725	7.43023	99.8284
	22.6533	241.181	7.43108	99.8398
	22.6967	241.643	7.43208	99.8533
	22.74	242.105	7.43138	99.8439
	22.7833	242.57	7.43023	99.8284
	22.8267	243.027	7.43031	99.8295
	22.87	243.483	7.43038	99.8304
	22.9133	243.943	7.43115	99.8408
	22.9567	244.404	7.432	99.8522
	23	244.867	7.43238	99.8573
	23.0433	245.326	7.432	99.8522
	23.0867	245.784	7.43223	99.8553
	23.13	246.245	7.43161	99.847
	23.1733	246.705	7.43169	99.848
	23.2167	247.168	7.43092	99.8377
	23.26	247.631	7.43177	99.8491
	23.3033	248.09	7.43208	99.8533
	23.3467	248.551	7.43269	99.8615
	23.39	249.017	7.43223	99.8553
	23.4333	249.48	7.43246	99.8584
	23.4767	249.942	7.43277	99.8626
	23.52	250.404	7.43246	99.8584
	23.5633	250.865	7.43285	99.8636
	23.6067	251.327	7.43292	99.8646
	23.65	251.793	7.43285	99.8636
	23.6933	252.255	7.43269	99.8615
	23.7367	252.716	7.433	99.8656
	23.78	253.178	7.433	99.8656
	23.8233	253.628	7.43277	99.8626
	23.8667	254.082	7.43277	99.8626
	23.91	254.537	7.43262	99.8605
	23.9533	254.992	7.43323	99.8687
	23.9967	255.454	7.43331	99.8698
	24.04	255.915	7.43385	99.8771
	24.0833	256.367	7.43354	99.8729
	24.1267	256.818	7.43315	99.8677
	24.17	257.268	7.43408	99.8802
	24.2133	257.715	7.43369	99.8749
	24.2567	258.172	7.43354	99.8729
	24.3	258.628	7.43292	99.8646
	24.3433	259.085	7.43346	99.8718
	24.3867	259.54	7.43354	99.8729
	24.43	259.992	7.43331	99.8698
	24.4733	260.449	7.43362	99.874
	24.5167	260.902	7.43323	99.8687
	24.56	261.358	7.43377	99.876
	24.6033	261.808	7.434	99.8791
	24.6467	262.259	7.43431	99.8832
	24.69	262.71	7.43431	99.8832
	24.7333	263.162	7.43508	99.8936
	24.7767	263.619	7.43646	99.9121
	24.82	264.074	7.437	99.9194
	24.8633	264.533	7.43623	99.909
	24.9067	264.984	7.43562	99.9008
	24.95	265.436	7.43546	99.8987
	24.9933	265.893	7.43523	99.8956
	25.0367	266.352	7.43562	99.9008
	25.08	266.808	7.43485	99.8905
	25.1233	267.261	7.43469	99.8884
	25.1667	267.722	7.43531	99.8967
	25.21	268.18	7.43569	99.9018
	25.2533	268.641	7.436	99.906
	25.2967	269.093	7.43554	99.8998
	25.34	269.553	7.43508	99.8936
	25.3833	270.01	7.43523	99.8956
	25.4267	270.474	7.43623	99.909
	25.47	270.936	7.43608	99.907
	25.5133	271.393	7.43646	99.9121
	25.5567	271.851	7.43623	99.909
	25.6	272.304	7.43631	99.9101
	25.6433	272.762	7.43592	99.9049
	25.6867	273.218	7.43631	99.9101
	25.73	273.671	7.43677	99.9163
	25.7733	274.127	7.43608	99.907
	25.8167	274.582	7.43538	99.8976
	25.86	275.038	7.43592	99.9049
	25.9033	275.496	7.43615	99.908
	25.9467	275.951	7.43646	99.9121
	25.99	276.406	7.43646	99.9121
	26.0333	276.862	7.43631	99.9101
	26.0767	277.319	7.43677	99.9163
	26.12	277.776	7.43746	99.9256
	26.1633	278.222	7.43785	99.9308
	26.2067	278.674	7.43769	99.9287
	26.25	279.118	7.43854	99.9401
	26.2933	279.568	7.43877	99.9432
	26.3367	280.01	7.438	99.9328
	26.38	280.46	7.43823	99.9359
	26.4233	280.904	7.438	99.9328
	26.4667	281.361	7.43746	99.9256
	26.51	281.811	7.43854	99.9401
	26.5533	282.262	7.43877	99.9432
	26.5967	282.713	7.43915	99.9483
	26.64	283.169	7.43908	99.9473
	26.6833	283.625	7.43938	99.9514
	26.7267	284.078	7.43961	99.9545
	26.77	284.528	7.43977	99.9566
	26.8133	284.982	7.43985	99.9577
	26.8567	285.441	7.43892	99.9452
	26.9	285.892	7.43923	99.9493
	26.9433	286.344	7.43992	99.9586
	26.9867	286.798	7.43985	99.9577
	27.03	287.251	7.43877	99.9432
	27.0733	287.705	7.43908	99.9473
	27.1167	288.16	7.44	99.9597
	27.16	288.617	7.44023	99.9628
	27.2033	289.07	7.44023	99.9628
	27.2467	289.526	7.43938	99.9514
	27.29	289.98	7.43977	99.9566
	27.3333	290.436	7.43969	99.9555
	27.3767	290.889	7.44008	99.9608
	27.42	291.337	7.441	99.9731
	27.4633	291.79	7.44138	99.9782
	27.5067	292.245	7.44108	99.9742
	27.55	292.701	7.44138	99.9782
	27.5933	293.147	7.44177	99.9835
	27.6367	293.597	7.44177	99.9835
	27.68	294.042	7.44169	99.9824
	27.7233	294.494	7.44131	99.9773
	27.7667	294.946	7.44169	99.9824
	27.81	295.397	7.44208	99.9876
	27.8533	295.847	7.44223	99.9897
	27.8967	296.299	7.442	99.9866
	27.94	296.75	7.44162	99.9815
	27.9833	297.203	7.44154	99.9804
	28.0267	297.655	7.44185	99.9845
	28.07	298.108	7.44185	99.9845
	28.1133	298.557	7.44131	99.9773
	28.1567	299.009	7.44108	99.9742
	28.2	299.455	7.44215	99.9886
	28.2433	299.905	7.44223	99.9897
	28.2867	300.358	7.44215	99.9886
	28.33	300.808	7.44208	99.9876
	28.3733	301.252	7.44192	99.9855
	28.4167	301.707	7.44154	99.9804
	28.46	302.16	7.44246	99.9927
	28.5033	302.609	7.44292	99.9989
	28.5467	303.055	7.44323	100.003
	28.59	303.502	7.44338	100.005
	28.6333	303.954	7.44408	100.015
	28.6767	304.405	7.44462	100.022
	28.72	304.852	7.44492	100.026
	28.7633	305.3	7.44515	100.029
	28.8067	305.748	7.44485	100.025
	28.85	306.199	7.444	100.013
	28.8933	306.646	7.44369	100.009
	28.9367	307.097	7.444	100.013
	28.98	307.546	7.44369	100.009
	29.0233	307.995	7.44415	100.015
	29.0667	308.444	7.44385	100.011
	29.11	308.895	7.44423	100.017
	29.1533	309.345	7.44439	100.019
	29.1967	309.796	7.44439	100.019
	29.24	310.25	7.44561	100.035
	29.2833	310.701	7.44538	100.032
	29.3267	311.155	7.44538	100.032
	29.37	311.612	7.44508	100.028
	29.4133	312.06	7.44485	100.025
	29.4567	312.514	7.44508	100.028
	29.5	312.962	7.44508	100.028
	29.5433	313.414	7.44546	100.033
	29.5867	313.863	7.44554	100.034
	29.63	314.32	7.44561	100.035
	29.6733	314.773	7.44561	100.035
	29.7167	315.228	7.44561	100.035
	29.76	315.683	7.44577	100.037
	29.8033	316.136	7.446	100.04
	29.8467	316.587	7.44615	100.042
	29.89	317.037	7.44561	100.035
	29.9333	317.482	7.44577	100.037
	29.9767	317.935	7.44685	100.052
	30.02	318.384	7.44646	100.046
	30.0633	318.831	7.44623	100.043
	30.1067	319.277	7.446	100.04
	30.15	319.721	7.44615	100.042
	30.1933	320.166	7.44662	100.049
	30.2367	320.61	7.44662	100.049
	30.28	321.05	7.44662	100.049
	30.3233	321.488	7.44615	100.042
	30.3667	321.93	7.44585	100.038
	30.41	322.37	7.446	100.04
	30.4533	322.811	7.446	100.04
	30.4967	323.25	7.44554	100.034
	30.54	323.69	7.44577	100.037
	30.5833	324.136	7.44623	100.043
	30.6267	324.573	7.44638	100.045
	30.67	325.017	7.44685	100.052
	30.7133	325.458	7.44715	100.056
	30.7567	325.899	7.44654	100.048
	30.8	326.346	7.44723	100.057
	30.8433	326.789	7.448	100.067
	30.8867	327.233	7.44723	100.057
	30.93	327.678	7.44769	100.063
	30.9733	328.119	7.44738	100.059
	31.0167	328.558	7.44815	100.069
	31.06	329.005	7.44908	100.082
	31.1033	329.451	7.44954	100.088
	31.1467	329.897	7.44908	100.082
	31.19	330.344	7.44915	100.083
	31.2333	330.79	7.44931	100.085
	31.2767	331.238	7.45	100.094
	31.32	331.687	7.45023	100.097
	31.3633	332.135	7.44985	100.092
	31.4067	332.578	7.44938	100.086
	31.45	333.022	7.44946	100.087
	31.4933	333.469	7.45008	100.095
	31.5367	333.919	7.45031	100.098
	31.58	334.364	7.44992	100.093
	31.6233	334.808	7.45008	100.095
	31.6667	335.258	7.45	100.094
	31.71	335.709	7.44946	100.087
	31.7533	336.159	7.44923	100.084
	31.7967	336.606	7.45	100.094
	31.84	337.048	7.45046	100.1
	31.8833	337.492	7.45031	100.098
	31.9267	337.933	7.45031	100.098
	31.97	338.376	7.45031	100.098
	32.0133	338.823	7.44969	100.09
	32.0567	339.269	7.45008	100.095
	32.1	339.712	7.45023	100.097
	32.1433	340.149	7.45008	100.095
	32.1867	340.589	7.45031	100.098
	32.23	341.033	7.45069	100.103
	32.2733	341.472	7.45092	100.106
	32.3167	341.913	7.45023	100.097
	32.36	342.358	7.45115	100.109
	32.4033	342.803	7.45154	100.115
	32.4467	343.248	7.45131	100.112
	32.49	343.695	7.45185	100.119
	32.5333	344.133	7.45223	100.124
	32.5767	344.582	7.45331	100.139
	32.62	345.027	7.45269	100.13
	32.6633	345.471	7.45169	100.117
	32.7067	345.921	7.45277	100.131
	32.75	346.367	7.45223	100.124
	32.7933	346.819	7.45131	100.112
	32.8367	347.27	7.451	100.107
	32.88	347.714	7.45246	100.127
	32.9233	348.162	7.45192	100.12
	32.9667	348.611	7.45192	100.12
	33.01	349.054	7.45185	100.119
	33.0533	349.504	7.45085	100.105
	33.0967	349.952	7.45123	100.111
	33.14	350.397	7.451	100.107
	33.1833	350.84	7.45054	100.101
	33.2267	351.29	7.45123	100.111
	33.27	351.735	7.451	100.107
	33.3133	352.178	7.451	100.107
	33.3567	352.623	7.45108	100.109
	33.4	353.066	7.45092	100.106
	33.4433	353.511	7.45115	100.109
	33.4867	353.947	7.45108	100.109
	33.53	354.387	7.45162	100.116
	33.5733	354.831	7.45162	100.116
	33.6167	355.277	7.45108	100.109
	33.66	355.717	7.45069	100.103
	33.7033	356.154	7.45008	100.095
	33.7467	356.599	7.44985	100.092
	33.79	357.04	7.44962	100.089
	33.8333	357.485	7.45038	100.099
	33.8767	357.925	7.45023	100.097
	33.92	358.37	7.44985	100.092
	33.9633	358.814	7.44954	100.088
	34.0067	359.261	7.44946	100.087
	34.05	359.703	7.44923	100.084
	34.0933	360.147	7.44885	100.079
	34.1367	360.594	7.44777	100.064
	34.18	361.037	7.44785	100.065
	34.2233	361.482	7.44708	100.055
	34.2667	361.923	7.44669	100.05
	34.31	362.364	7.44685	100.052
	34.3533	362.806	7.44631	100.044
	34.3967	363.255	7.446	100.04
	34.44	363.693	7.44561	100.035
	34.4833	364.135	7.44554	100.034
	34.5267	364.577	7.44585	100.038
	34.57	365.017	7.446	100.04
	34.6133	365.457	7.44623	100.043
	34.6567	365.903	7.44608	100.041
	34.7	366.345	7.44585	100.038
	34.7433	366.784	7.44546	100.033
	34.7867	367.226	7.44469	100.023
	34.83	367.666	7.44385	100.011
	34.8733	368.105	7.44362	100.008
	34.9167	368.541	7.44346	100.006
	34.96	368.982	7.44308	100.001
	35.0033	369.428	7.44231	99.9907
	35.0467	369.872	7.442	99.9866
	35.09	370.313	7.44162	99.9815
	35.1333	370.754	7.44046	99.9659
	35.1767	371.191	7.43961	99.9545
	35.22	371.639	7.43938	99.9514
	35.2633	372.076	7.43869	99.9421
	35.3067	372.525	7.43862	99.9412
	35.35	372.965	7.43769	99.9287
	35.3933	373.407	7.43762	99.9277
	35.4367	373.858	7.437	99.9194
	35.48	374.3	7.43638	99.9111
	35.5233	374.743	7.43592	99.9049
	35.5667	375.184	7.43477	99.8894
	35.61	375.629	7.43392	99.878
	35.6533	376.072	7.43385	99.8771
	35.6967	376.515	7.43431	99.8832
	35.74	376.963	7.43385	99.8771
	35.7833	377.403	7.43338	99.8708
	35.8267	377.845	7.433	99.8656
	35.87	378.288	7.43192	99.8511
	35.9133	378.727	7.43023	99.8284
	35.9567	379.169	7.42962	99.8202
	36	379.61	7.42885	99.8099
	36.0433	380.06	7.42738	99.7901
	36.0867	380.51	7.42662	99.7799
	36.13	380.958	7.42577	99.7685
	36.1733	381.407	7.42469	99.754
	36.2167	381.85	7.42415	99.7467
	36.26	382.292	7.42315	99.7333
	36.3033	382.734	7.42246	99.724
	36.3467	383.176	7.42061	99.6992
	36.39	383.618	7.42038	99.6961
	36.4333	384.064	7.42023	99.6941
	36.4767	384.507	7.41985	99.689
	36.52	384.952	7.41892	99.6765
	36.5633	385.392	7.41754	99.6579
	36.6067	385.84	7.41631	99.6414
	36.65	386.286	7.41477	99.6207
	36.6933	386.727	7.41408	99.6114
	36.7367	387.171	7.413	99.5969
	36.78	387.612	7.41246	99.5897
	36.8233	388.052	7.41154	99.5773
	36.8667	388.49	7.41062	99.565
	36.91	388.938	7.40954	99.5505
	36.9533	389.383	7.408	99.5298
	36.9967	389.828	7.40723	99.5194
	37.04	390.272	7.40562	99.4978
	37.0833	390.714	7.40446	99.4822
	37.1267	391.155	7.403	99.4626
	37.17	391.599	7.40192	99.4481
	37.2133	392.043	7.40015	99.4243
	37.2567	392.482	7.39946	99.415
	37.3	392.926	7.39785	99.3934
	37.3433	393.372	7.39638	99.3736
	37.3867	393.811	7.39469	99.3509
	37.43	394.262	7.39338	99.3333
	37.4733	394.706	7.39162	99.3097
	37.5167	395.152	7.38985	99.2859
	37.56	395.6	7.38892	99.2734
	37.6033	396.047	7.38715	99.2496
	37.6467	396.498	7.38546	99.2269
	37.69	396.949	7.38485	99.2187
	37.7333	397.405	7.38315	99.1959
	37.7767	397.842	7.381	99.167
	37.82	398.285	7.37931	99.1443
	37.8633	398.728	7.37738	99.1184
	37.9067	399.179	7.37538	99.0915
	37.95	399.626	7.37338	99.0646
	37.9933	400.072	7.371	99.0326
	38.0367	400.52	7.369	99.0058
	38.08	400.964	7.36692	98.9778
	38.1233	401.412	7.36438	98.9437
	38.1667	401.86	7.36215	98.9137
	38.21	402.311	7.35977	98.8818
	38.2533	402.76	7.35738	98.8497
	38.2967	403.202	7.35623	98.8342
	38.34	403.654	7.35454	98.8115
	38.3833	404.1	7.35208	98.7784
	38.4267	404.549	7.349	98.7371
	38.47	404.995	7.34631	98.7009
	38.5133	405.44	7.34462	98.6782
	38.5567	405.882	7.34246	98.6492
	38.6	406.321	7.34046	98.6223
	38.6433	406.764	7.33862	98.5976
	38.6867	407.209	7.33677	98.5728
	38.73	407.656	7.33438	98.5406
	38.7733	408.101	7.33177	98.5056
	38.8167	408.547	7.32946	98.4745
	38.86	408.992	7.32731	98.4457
	38.9033	409.428	7.325	98.4146
	38.9467	409.877	7.322	98.3743
	38.99	410.326	7.31869	98.3298
	39.0333	410.765	7.31608	98.2948
	39.0767	411.213	7.31315	98.2554
	39.12	411.661	7.31046	98.2193
	39.1633	412.107	7.30777	98.1831
	39.2067	412.55	7.30362	98.1274
	39.25	412.996	7.30054	98.086
	39.2933	413.446	7.29669	98.0343
	39.3367	413.896	7.29423	98.0012
	39.38	414.344	7.29131	97.962
	39.4233	414.789	7.28815	97.9195
	39.4667	415.24	7.28485	97.8752
	39.51	415.688	7.28231	97.8411
	39.5533	416.135	7.27908	97.7977
	39.5967	416.584	7.27508	97.7439
	39.64	417.028	7.27231	97.7067
	39.6833	417.472	7.26923	97.6653
	39.7267	417.91	7.26569	97.6178
	39.77	418.351	7.26108	97.5558
	39.8133	418.793	7.25892	97.5268
	39.8567	419.236	7.25585	97.4856
	39.9	419.679	7.25185	97.4318
	39.9433	420.12	7.24892	97.3924
	39.9867	420.561	7.24469	97.3356
	40.03	421.003	7.24131	97.2902
	40.0733	421.444	7.23777	97.2426
	40.1167	421.887	7.23477	97.2023
	40.16	422.324	7.23123	97.1548
	40.2033	422.767	7.22831	97.1155
	40.2467	423.205	7.225	97.0711
	40.29	423.648	7.22108	97.0184
	40.3333	424.096	7.21708	96.9647
	40.3767	424.536	7.21392	96.9222
	40.42	424.979	7.21	96.8695
	40.4633	425.418	7.20638	96.8209
	40.5067	425.854	7.20246	96.7682
	40.55	426.295	7.19831	96.7125
	40.5933	426.736	7.194	96.6546
	40.6367	427.174	7.18954	96.5947
	40.68	427.615	7.18685	96.5585
	40.7233	428.057	7.18338	96.5119
	40.7667	428.496	7.179	96.453
	40.81	428.94	7.17561	96.4075
	40.8533	429.381	7.17162	96.3539
	40.8967	429.825	7.16823	96.3083
	40.94	430.269	7.16408	96.2526
	40.9833	430.71	7.16038	96.2029
	41.0267	431.151	7.15646	96.1502
	41.07	431.587	7.151	96.0769
	41.1133	432.031	7.14754	96.0304
	41.1567	432.479	7.14415	95.9848
	41.2	432.926	7.14061	95.9373
	41.2433	433.361	7.13677	95.8857
	41.2867	433.8	7.13215	95.8236
	41.33	434.231	7.12861	95.776
	41.3733	434.668	7.12354	95.7079
	41.4167	435.11	7.11992	95.6593
	41.46	435.549	7.11546	95.5994
	41.5033	435.99	7.11185	95.5509
	41.5467	436.425	7.10854	95.5064
	41.59	436.863	7.10469	95.4547
	41.6333	437.305	7.09954	95.3855
	41.6767	437.739	7.09523	95.3276
	41.72	438.172	7.09208	95.2852
	41.7633	438.609	7.08738	95.2221
	41.8067	439.044	7.08377	95.1736
	41.85	439.479	7.07962	95.1178
	41.8933	439.917	7.07546	95.0619
	41.9367	440.351	7.07069	94.9979
	41.98	440.787	7.06615	94.9369
	42.0233	441.221	7.06161	94.8759
	42.0667	441.66	7.05761	94.8221
	42.11	442.1	7.05354	94.7674
	42.1533	442.545	7.04969	94.7157
	42.1967	442.988	7.04592	94.6651
	42.24	443.427	7.04246	94.6186
	42.2833	443.868	7.03777	94.5556
	42.3267	444.309	7.03362	94.4998
	42.37	444.752	7.02854	94.4315
	42.4133	445.192	7.02454	94.3778
	42.4567	445.637	7.01992	94.3157
	42.5	446.088	7.01554	94.2569
	42.5433	446.534	7.01169	94.2052
	42.5867	446.978	7.00662	94.137
	42.63	447.423	7.00262	94.0833
	42.6733	447.863	6.99792	94.0202
	42.7167	448.3	6.99408	93.9686
	42.76	448.742	6.98954	93.9076
	42.8033	449.185	6.98531	93.8507
	42.8467	449.63	6.98185	93.8042
	42.89	450.069	6.978	93.7525
	42.9333	450.511	6.97377	93.6957
	42.9767	450.948	6.96908	93.6327
	43.02	451.388	6.96369	93.5603
	43.0633	451.824	6.96008	93.5118
	43.1067	452.272	6.95654	93.4642
	43.15	452.711	6.95092	93.3887
	43.1933	453.15	6.94715	93.338
	43.2367	453.589	6.94262	93.2772
	43.28	454.038	6.93708	93.2027
	43.3233	454.483	6.93308	93.149
	43.3667	454.926	6.92869	93.09
	43.41	455.37	6.92415	93.029
	43.4533	455.814	6.91962	92.9682
	43.4967	456.26	6.91492	92.905
	43.54	456.697	6.91123	92.8554
	43.5833	457.142	6.90662	92.7935
	43.6267	457.584	6.90262	92.7398
	43.67	458.025	6.89823	92.6808
	43.7133	458.471	6.89431	92.6281
	43.7567	458.915	6.88892	92.5557
	43.8	459.362	6.88562	92.5114
	43.8433	459.81	6.88054	92.4431
	43.8867	460.256	6.87592	92.381
	43.93	460.701	6.87131	92.3191
	43.9733	461.143	6.86669	92.257
	44.0167	461.587	6.86277	92.2044
	44.06	462.024	6.858	92.1403
	44.1033	462.466	6.85361	92.0813
	44.1467	462.906	6.84838	92.011
	44.19	463.352	6.84392	91.9511
	44.2333	463.792	6.84015	91.9004
	44.2767	464.233	6.83546	91.8374
	44.32	464.682	6.83054	91.7713
	44.3633	465.13	6.82608	91.7114
	44.4067	465.574	6.821	91.6432
	44.45	466.011	6.81654	91.5832
	44.4933	466.45	6.81169	91.5181
	44.5367	466.9	6.80708	91.4561
	44.58	467.34	6.80223	91.391
	44.6233	467.776	6.79738	91.3258
	44.6667	468.216	6.79369	91.2762
	44.71	468.657	6.78908	91.2143
	44.7533	469.099	6.78354	91.1399
	44.7967	469.539	6.77892	91.0778
	44.84	469.978	6.77331	91.0024
	44.8833	470.417	6.76877	90.9414
	44.9267	470.852	6.76492	90.8897
	44.97	471.301	6.76008	90.8247
	45.0133	471.742	6.75508	90.7575
	45.0567	472.19	6.75015	90.6913
	45.1	472.624	6.74508	90.6231
	45.1433	473.07	6.74069	90.5642
	45.1867	473.51	6.73554	90.495
	45.23	473.947	6.73038	90.4256
	45.2733	474.394	6.72531	90.3575
	45.3167	474.836	6.72031	90.2903
	45.36	475.28	6.71592	90.2314
	45.4033	475.724	6.711	90.1653
	45.4467	476.171	6.70485	90.0826
	45.49	476.616	6.69969	90.0133
	45.5333	477.054	6.69608	89.9648
	45.5767	477.491	6.69054	89.8904
	45.62	477.932	6.68615	89.8314
	45.6633	478.379	6.68085	89.7602
	45.7067	478.824	6.67561	89.6898
	45.75	479.263	6.671	89.6278
	45.7933	479.7	6.66485	89.5452
	45.8367	480.139	6.66031	89.4842
	45.88	480.581	6.65569	89.4221
	45.9233	481.022	6.65023	89.3488
	45.9667	481.462	6.64485	89.2765
	46.01	481.901	6.63946	89.2041
	46.0533	482.342	6.63385	89.1287
	46.0967	482.782	6.62815	89.0521
	46.14	483.222	6.62285	88.9809
	46.1833	483.659	6.61761	88.9105
	46.2267	484.104	6.61254	88.8424
	46.27	484.547	6.60762	88.7763
	46.3133	484.989	6.60262	88.7091
	46.3567	485.424	6.59677	88.6305
	46.4	485.862	6.592	88.5664
	46.4433	486.301	6.58546	88.4786
	46.4867	486.741	6.58046	88.4114
	46.53	487.18	6.57546	88.3442
	46.5733	487.621	6.57015	88.2729
	46.6167	488.059	6.56477	88.2006
	46.66	488.499	6.55985	88.1345
	46.7033	488.942	6.55508	88.0704
	46.7467	489.384	6.55061	88.0103
	46.79	489.825	6.54546	87.9412
	46.8333	490.263	6.53938	87.8595
	46.8767	490.705	6.53392	87.7861
	46.92	491.15	6.52846	87.7128
	46.9633	491.588	6.52323	87.6425
	47.0067	492.019	6.51769	87.5681
	47.05	492.429	6.51262	87.4999
	47.0933	492.815	6.50708	87.4255
	47.1367	493.189	6.50215	87.3593
	47.18	493.562	6.49738	87.2952
	47.2233	493.942	6.49269	87.2322
	47.2667	494.33	6.48715	87.1577
	47.31	494.715	6.482	87.0885
	47.3533	495.101	6.47662	87.0163
	47.3967	495.491	6.47038	86.9324
	47.44	495.891	6.46469	86.856
	47.4833	496.297	6.46038	86.7981
	47.5267	496.711	6.45608	86.7403
	47.57	497.137	6.45092	86.671
	47.6133	497.583	6.44523	86.5945
	47.6567	498.049	6.44008	86.5253
	47.7	498.528	6.43446	86.4498
	47.7433	499.015	6.42923	86.3796
	47.7867	499.503	6.42408	86.3104
	47.83	499.992	6.41838	86.2338
	47.8733	500.475	6.41277	86.1584
	47.9167	500.954	6.40738	86.086
	47.96	501.423	6.40238	86.0188
	48.0033	501.895	6.39731	85.9507
	48.0467	502.361	6.39262	85.8877
	48.09	502.821	6.38738	85.8173
	48.1333	503.28	6.38138	85.7367
	48.1767	503.734	6.37662	85.6727
	48.22	504.187	6.37146	85.6034
	48.2633	504.626	6.366	85.53
	48.3067	505.064	6.361	85.4629
	48.35	505.503	6.35462	85.3771
	48.3933	505.935	6.34977	85.312
	48.4367	506.369	6.34523	85.251
	48.48	506.82	6.34015	85.1827
	48.5233	507.266	6.33546	85.1197
	48.5667	507.718	6.33069	85.0556
	48.61	508.17	6.32508	84.9802
	48.6533	508.621	6.31938	84.9037
	48.6967	509.072	6.31415	84.8334
	48.74	509.519	6.30892	84.7631
	48.7833	509.966	6.30438	84.7021
	48.8267	510.409	6.29938	84.635
	48.87	510.853	6.29485	84.5741
	48.9133	511.293	6.28992	84.5079
	48.9567	511.735	6.28508	84.4428
	49	512.168	6.28031	84.3787
	49.0433	512.604	6.27485	84.3054
	49.0867	513.041	6.26962	84.2351
	49.13	513.48	6.26538	84.1782
	49.1733	513.915	6.26046	84.1121
	49.2167	514.348	6.25438	84.0304
	49.26	514.787	6.25069	83.9808
	49.3033	515.224	6.24585	83.9158
	49.3467	515.66	6.24077	83.8475
	49.39	516.096	6.23623	83.7865
	49.4333	516.533	6.23162	83.7246
	49.4767	516.967	6.22654	83.6563
	49.52	517.403	6.22115	83.5839
	49.5633	517.84	6.21654	83.522
	49.6067	518.275	6.21231	83.4651
	49.65	518.711	6.20815	83.4092
	49.6933	519.145	6.20315	83.3421
	49.7367	519.578	6.197	83.2594
	49.78	520.018	6.19338	83.2108
	49.8233	520.454	6.18923	83.155
	49.8667	520.889	6.18423	83.0879
	49.91	521.325	6.17938	83.0227
	49.9533	521.762	6.17462	82.9588
	49.9967	522.199	6.17054	82.9039
	50.04	522.64	6.16662	82.8513
	50.0833	523.073	6.16177	82.7861
	50.1267	523.507	6.15746	82.7282
	50.17	523.938	6.15254	82.6621
	50.2133	524.376	6.14892	82.6135
	50.2567	524.811	6.14392	82.5463
	50.3	525.247	6.13954	82.4874
	50.3433	525.685	6.13462	82.4213
	50.3867	526.123	6.13054	82.3665
	50.43	526.56	6.12654	82.3128
	50.4733	526.989	6.12177	82.2487
	50.5167	527.414	6.11769	82.1939
	50.56	527.842	6.11331	82.135
	50.6033	528.27	6.10923	82.0802
	50.6467	528.702	6.10454	82.0172
	50.69	529.134	6.10054	81.9635
	50.7333	529.562	6.09638	81.9076
	50.7767	529.992	6.09262	81.857
	50.82	530.418	6.089	81.8084
	50.8633	530.85	6.08508	81.7557
	50.9067	531.283	6.08154	81.7082
	50.95	531.719	6.07808	81.6617
	50.9933	532.153	6.07431	81.611
	51.0367	532.582	6.06992	81.5521
	51.08	533.018	6.06546	81.4921
	51.1233	533.456	6.06123	81.4353
	51.1667	533.888	6.05731	81.3826
	51.21	534.324	6.05408	81.3392
	51.2533	534.754	6.05046	81.2906
	51.2967	535.187	6.04646	81.2369
	51.34	535.624	6.04169	81.1728
	51.3833	536.066	6.03792	81.1221
	51.4267	536.505	6.03554	81.0902
	51.47	536.937	6.03246	81.0488
	51.5133	537.37	6.02815	80.9909
	51.5567	537.799	6.02438	80.9402
	51.6	538.227	6.02062	80.8897
	51.6433	538.66	6.01631	80.8318
	51.6867	539.092	6.013	80.7873
	51.73	539.527	6.00946	80.7398
	51.7733	539.966	6.00677	80.7036
	51.8167	540.396	6.00369	80.6622
	51.86	540.827	6.00023	80.6157
	51.9033	541.262	5.997	80.5723
	51.9467	541.699	5.99415	80.5341
	51.99	542.131	5.99169	80.501
	52.0333	542.565	5.98854	80.4587
	52.0767	542.997	5.98485	80.4091
	52.12	543.429	5.98262	80.3791
	52.1633	543.862	5.97962	80.3388
	52.2067	544.293	5.97669	80.2995
	52.25	544.732	5.97477	80.2737
	52.2933	545.167	5.97146	80.2292
	52.3367	545.602	5.969	80.1962
	52.38	546.032	5.967	80.1693
	52.4233	546.468	5.96508	80.1435
	52.4667	546.895	5.96238	80.1072
	52.51	547.328	5.96062	80.0836
	52.5533	547.76	5.95823	80.0515
	52.5967	548.187	5.95592	80.0204
	52.64	548.621	5.95385	79.9926
	52.6833	549.051	5.952	79.9678
	52.7267	549.482	5.94962	79.9358
	52.77	549.908	5.948	79.914
	52.8133	550.336	5.94531	79.8779
	52.8567	550.764	5.94369	79.8561
	52.9	551.189	5.94277	79.8437
	52.9433	551.609	5.94092	79.8189
	52.9867	552.034	5.93969	79.8024
	53.03	552.456	5.93792	79.7786
	53.0733	552.884	5.93723	79.7693
	53.1167	553.305	5.93654	79.76
	53.16	553.728	5.93431	79.7301
	53.2033	554.152	5.93354	79.7197
	53.2467	554.575	5.93231	79.7032
	53.29	555	5.93146	79.6918
	53.3333	555.419	5.93115	79.6876
	53.3767	555.838	5.93054	79.6794
	53.42	556.25	5.92985	79.6702
	53.4633	556.671	5.92946	79.6649
	53.5067	557.089	5.92923	79.6618
	53.55	557.504	5.92931	79.6629
	53.5933	557.909	5.92754	79.6391
	53.6367	558.318	5.92762	79.6402
	53.68	558.719	5.92777	79.6422
	53.7233	559.122	5.92646	79.6246
	53.7667	559.524	5.92608	79.6195
	53.81	559.94	5.92592	79.6174
	53.8533	560.405	5.92654	79.6257
	53.8967	560.895	5.92646	79.6246
	53.94	561.376	5.92685	79.6299
	53.9833	561.845	5.92838	79.6504
	54.0267	562.302	5.92923	79.6618
	54.07	562.743	5.93023	79.6753
	54.1133	563.185	5.93008	79.6733
	54.1567	563.621	5.92992	79.6711
	54.2	564.056	5.93092	79.6845
	54.2433	564.493	5.93208	79.7001
	54.2867	564.928	5.93238	79.7042
	54.33	565.361	5.93208	79.7001
	54.3733	565.795	5.93292	79.7114
	54.4167	566.224	5.933	79.7125
	54.46	566.661	5.93323	79.7156
	54.5033	567.095	5.93392	79.7248
	54.5467	567.527	5.93454	79.7332
	54.59	567.96	5.93523	79.7424
	54.6333	568.387	5.93615	79.7548
	54.6767	568.819	5.93623	79.7559
	54.72	569.254	5.93723	79.7693
	54.7633	569.688	5.93715	79.7682
	54.8067	570.118	5.93831	79.7838
	54.85	570.547	5.93961	79.8013
	54.8933	570.971	5.93992	79.8055
	54.9367	571.4	5.94085	79.8179
	54.98	571.834	5.94115	79.822
	55.0233	572.264	5.94185	79.8314
	55.0667	572.691	5.94192	79.8323
	55.11	573.127	5.94208	79.8345
	55.1533	573.551	5.94231	79.8376
	55.1967	573.982	5.94323	79.8499
	55.24	574.411	5.94369	79.8561
	55.2833	574.838	5.94415	79.8623
	55.3267	575.271	5.94423	79.8634
	55.37	575.699	5.94446	79.8665
	55.4133	576.123	5.94377	79.8572
	55.4567	576.555	5.94438	79.8654
	55.5	576.979	5.94538	79.8788
	55.5433	577.405	5.945	79.8737
	55.5867	577.829	5.946	79.8871
	55.63	578.262	5.94661	79.8953
	55.6733	578.687	5.94677	79.8975
	55.7167	579.115	5.94785	79.912
	55.76	579.546	5.94908	79.9285
	55.8033	579.973	5.94915	79.9295
	55.8467	580.405	5.94931	79.9316
	55.89	580.834	5.94915	79.9295
	55.9333	581.268	5.94931	79.9316
	55.9767	581.701	5.94962	79.9358
	56.02	582.129	5.94962	79.9358
	56.0633	582.554	5.95023	79.944
	56.1067	582.979	5.95069	79.9502
	56.15	583.408	5.95154	79.9616
	56.1933	583.831	5.95162	79.9626
	56.2367	584.259	5.95108	79.9554
	56.28	584.691	5.95192	79.9667
	56.3233	585.118	5.95162	79.9626
	56.3667	585.544	5.95262	79.9761
	56.41	585.973	5.95285	79.9792
	56.4533	586.408	5.95346	79.9874
	56.4967	586.841	5.95331	79.9854
	56.54	587.269	5.95369	79.9905
	56.5833	587.698	5.95408	79.9957
	56.6267	588.127	5.95538	80.0132
	56.67	588.552	5.95515	80.0101
	56.7133	588.98	5.95531	80.0122
	56.7567	589.411	5.95492	80.007
	56.8	589.841	5.95492	80.007
	56.8433	590.272	5.95508	80.0091
	56.8867	590.701	5.95592	80.0204
	56.93	591.12	5.95692	80.0339
	56.9733	591.554	5.95769	80.0442
	57.0167	591.979	5.95831	80.0525
	57.06	592.412	5.95838	80.0535
	57.1033	592.839	5.95831	80.0525
	57.1467	593.272	5.958	80.0484
	57.19	593.698	5.95823	80.0515
	57.2333	594.123	5.95846	80.0545
	57.2767	594.551	5.95831	80.0525
	57.32	594.975	5.95823	80.0515
	57.3633	595.404	5.95877	80.0587
	57.4067	595.833	5.95938	80.0669
	57.45	596.259	5.959	80.0618
	57.4933	596.681	5.959	80.0618
	57.5367	597.111	5.95985	80.0732
	57.58	597.541	5.95915	80.0638
	57.6233	597.967	5.95931	80.066
	57.6667	598.396	5.95992	80.0742
	57.71	598.815	5.95977	80.0721
	57.7533	599.234	5.96008	80.0763
	57.7967	599.656	5.96023	80.0783
	57.84	600.085	5.96131	80.0928
	57.8833	600.511	5.96262	80.1104
	57.9267	600.938	5.96146	80.0949
	57.97	601.365	5.961	80.0887
	58.0133	601.792	5.96069	80.0845
	58.0567	602.221	5.96115	80.0907
	58.1	602.65	5.96092	80.0876
	58.1433	603.071	5.96154	80.0959
	58.1867	603.493	5.96162	80.097
	58.23	603.917	5.962	80.1021
	58.2733	604.351	5.96277	80.1125
	58.3167	604.78	5.96254	80.1094
	58.36	605.21	5.96269	80.1114
	58.4033	605.637	5.96038	80.0803
	58.4467	606.062	5.96008	80.0763
	58.49	606.487	5.96031	80.0794
	58.5333	606.915	5.96	80.0752
	58.5767	607.345	5.96085	80.0867
	58.62	607.772	5.96046	80.0814
	58.6633	608.204	5.96131	80.0928
	58.7067	608.632	5.96054	80.0825
	58.75	609.063	5.95985	80.0732
	58.7933	609.487	5.95969	80.0711
	58.8367	609.914	5.95977	80.0721
	58.88	610.34	5.95838	80.0535
	58.9233	610.762	5.95769	80.0442
	58.9667	611.185	5.957	80.0349
	59.01	611.609	5.95585	80.0195
	59.0533	612.029	5.95438	79.9997
	59.0967	612.449	5.95292	79.9801
	59.14	612.864	5.95069	79.9502
	59.1833	613.281	5.94685	79.8986
	59.2267	613.695	5.943	79.8468
	59.27	614.109	5.937	79.7662
	59.3133	614.525	5.931	79.6856
	59.3567	614.942	5.92431	79.5957
	59.4	615.352	5.91615	79.4861
	59.4433	615.76	5.90846	79.3828
	59.4867	616.178	5.90038	79.2742
	59.53	616.596	5.89277	79.172
	59.5733	617.011	5.886	79.081
	59.6167	617.435	5.87785	78.9715
	59.66	617.865	5.86885	78.8506
	59.7033	618.288	5.86108	78.7462
	59.7467	618.709	5.85385	78.6491
	59.79	619.134	5.84654	78.5509
	59.8333	619.562	5.83969	78.4588
	59.8767	619.993	5.83208	78.3566
	59.92	620.417	5.82677	78.2852
	59.9633	620.843	5.82023	78.1974
	60.0067	621.274	5.81438	78.1188
	60.05	621.706	5.80869	78.0423
	60.0933	622.139	5.80346	77.9721
	60.1367	622.567	5.79854	77.906
	60.18	622.987	5.79254	77.8253
	60.2233	623.417	5.78815	77.7664
	60.2667	623.845	5.78415	77.7126
	60.31	624.268	5.77961	77.6516
	60.3533	624.696	5.77408	77.5773
	60.3967	625.117	5.77	77.5225
	60.44	625.547	5.76685	77.4802
	60.4833	625.978	5.76315	77.4305
	60.5267	626.393	5.75946	77.3809
	60.57	626.818	5.75562	77.3293
	60.6133	627.242	5.75277	77.291
	60.6567	627.668	5.74962	77.2487
	60.7	628.094	5.74685	77.2115
	60.7433	628.513	5.74392	77.1721
	60.7867	628.945	5.74223	77.1494
	60.83	629.373	5.73862	77.1009
	60.8733	629.792	5.73585	77.0637
	60.9167	630.217	5.73362	77.0337
	60.96	630.646	5.731	76.9985
	61.0033	631.075	5.72831	76.9624
	61.0467	631.498	5.72562	76.9262
	61.09	631.924	5.724	76.9045
	61.1333	632.349	5.72185	76.8756
	61.1767	632.775	5.71931	76.8415
	61.22	633.204	5.71669	76.8063
	61.2633	633.628	5.71469	76.7794
	61.3067	634.046	5.71308	76.7578
	61.35	634.465	5.71108	76.7309
	61.3933	634.884	5.70915	76.705
	61.4367	635.305	5.70708	76.6771
	61.48	635.73	5.70515	76.6512
	61.5233	636.155	5.70331	76.6265
	61.5667	636.577	5.702	76.6089
	61.61	636.995	5.70054	76.5893
	61.6533	637.415	5.69885	76.5666
	61.6967	637.828	5.69685	76.5397
	61.74	638.255	5.69408	76.5025
	61.7833	638.679	5.69346	76.4942
	61.8267	639.106	5.69177	76.4714
	61.87	639.534	5.69054	76.4549
	61.9133	639.958	5.68846	76.427
	61.9567	640.38	5.68731	76.4115
	62	640.801	5.68531	76.3847
	62.0433	641.222	5.68315	76.3556
	62.0867	641.643	5.68177	76.3371
	62.13	642.063	5.68054	76.3206
	62.1733	642.478	5.67892	76.2988
	62.2167	642.899	5.67785	76.2844
	62.26	643.314	5.67677	76.2699
	62.3033	643.732	5.67677	76.2699
	62.3467	644.154	5.67592	76.2585
	62.39	644.578	5.67438	76.2378
	62.4333	644.999	5.67269	76.2151
	62.4767	645.42	5.67154	76.1997
	62.52	645.844	5.67031	76.1831
	62.5633	646.264	5.66831	76.1563
	62.6067	646.69	5.66708	76.1397
	62.65	647.116	5.66546	76.118
	62.6933	647.549	5.66462	76.1067
	62.7367	647.981	5.66231	76.0756
	62.78	648.408	5.66115	76.0601
	62.8233	648.831	5.66015	76.0466
	62.8667	649.263	5.65854	76.025
	62.91	649.69	5.65785	76.0157
	62.9533	650.122	5.65685	76.0023
	62.9967	650.554	5.65469	75.9733
	63.04	650.982	5.65423	75.9671
	63.0833	651.404	5.65285	75.9485
	63.1267	651.833	5.65138	75.9288
	63.17	652.262	5.65085	75.9217
	63.2133	652.684	5.64962	75.9051
	63.2567	653.115	5.64792	75.8823
	63.3	653.542	5.64692	75.8689
	63.3433	653.968	5.64508	75.8441
	63.3867	654.387	5.64438	75.8347
	63.43	654.811	5.64346	75.8224
	63.4733	655.237	5.64262	75.8111
	63.5167	655.663	5.64085	75.7873
	63.56	656.088	5.63992	75.7748
	63.6033	656.518	5.639	75.7625
	63.6467	656.942	5.63731	75.7398
	63.69	657.369	5.63554	75.716
	63.7333	657.794	5.63431	75.6994
	63.7767	658.215	5.634	75.6953
	63.82	658.64	5.63246	75.6746
	63.8633	659.067	5.631	75.655
	63.9067	659.489	5.63023	75.6446
	63.95	659.922	5.62892	75.627
	63.9933	660.355	5.62669	75.5971
	64.0367	660.781	5.62577	75.5847
	64.08	661.204	5.62423	75.564
	64.1233	661.63	5.62223	75.5371
	64.1667	662.058	5.62092	75.5195
	64.21	662.485	5.61923	75.4968
	64.2533	662.907	5.61769	75.4762
	64.2967	663.333	5.61577	75.4504
	64.34	663.757	5.614	75.4266
	64.3833	664.179	5.61215	75.4017
	64.4267	664.609	5.61138	75.3914
	64.47	665.038	5.60946	75.3656
	64.5133	665.461	5.60846	75.3521
	64.5567	665.878	5.60731	75.3367
	64.6	666.301	5.60562	75.314
	64.6433	666.725	5.60415	75.2942
	64.6867	667.151	5.60292	75.2777
	64.73	667.576	5.60115	75.2539
	64.7733	668.007	5.59969	75.2343
	64.8167	668.428	5.599	75.225
	64.86	668.846	5.59769	75.2074
	64.9033	669.269	5.59654	75.192
	64.9467	669.694	5.59531	75.1755
	64.99	670.113	5.59385	75.1559
	65.0333	670.533	5.59262	75.1393
	65.0767	670.96	5.59054	75.1114
	65.12	671.386	5.58938	75.0958
	65.1633	671.804	5.58746	75.07
	65.2067	672.227	5.58554	75.0442
	65.25	672.643	5.58377	75.0204
	65.2933	673.06	5.58138	74.9883
	65.3367	673.484	5.58092	74.9821
	65.38	673.906	5.57915	74.9584
	65.4233	674.328	5.57731	74.9336
	65.4667	674.751	5.57623	74.9191
	65.51	675.178	5.57477	74.8995
	65.5533	675.598	5.57277	74.8726
	65.5967	676.016	5.57092	74.8478
	65.64	676.436	5.56969	74.8313
	65.6833	676.856	5.56746	74.8013
	65.7267	677.28	5.56585	74.7797
	65.77	677.697	5.56423	74.7579
	65.8133	678.117	5.56223	74.731
	65.8567	678.537	5.56023	74.7042
	65.9	678.958	5.55854	74.6814
	65.9433	679.373	5.55738	74.6659
	65.9867	679.796	5.55515	74.6359
	66.03	680.221	5.55385	74.6184
	66.0733	680.642	5.55208	74.5947
	66.1167	681.065	5.54969	74.5625
	66.16	681.482	5.54808	74.5409
	66.2033	681.905	5.54685	74.5244
	66.2467	682.334	5.54569	74.5088
	66.29	682.755	5.54454	74.4933
	66.3333	683.172	5.54185	74.4572
	66.3767	683.592	5.53977	74.4293
	66.42	684.01	5.53862	74.4138
	66.4633	684.429	5.53762	74.4004
	66.5067	684.842	5.53646	74.3848
	66.55	685.26	5.536	74.3786
	66.5933	685.681	5.53415	74.3538
	66.6367	686.095	5.53292	74.3372
	66.68	686.514	5.53062	74.3063
	66.7233	686.93	5.52946	74.2907
	66.7667	687.348	5.52715	74.2597
	66.81	687.767	5.52523	74.2339
	66.8533	688.183	5.52346	74.2101
	66.8967	688.609	5.52162	74.1854
	66.94	689.025	5.52031	74.1678
	66.9833	689.445	5.51877	74.1471
	67.0267	689.864	5.51715	74.1254
	67.07	690.287	5.51669	74.1192
	67.1133	690.708	5.51477	74.0934
	67.1567	691.133	5.51285	74.0676
	67.2	691.55	5.51215	74.0582
	67.2433	691.97	5.50969	74.0251
	67.2867	692.394	5.50831	74.0066
	67.33	692.819	5.50646	73.9817
	67.3733	693.241	5.50415	73.9507
	67.4167	693.661	5.50185	73.9198
	67.46	694.084	5.50123	73.9115
	67.5033	694.507	5.50077	73.9053
	67.5467	694.928	5.49962	73.8898
	67.59	695.351	5.49785	73.866
	67.6333	695.771	5.496	73.8412
	67.6767	696.189	5.494	73.8143
	67.72	696.612	5.49308	73.802
	67.7633	697.03	5.49246	73.7936
	67.8067	697.446	5.49077	73.7709
	67.85	697.865	5.48954	73.7544
	67.8933	698.284	5.48785	73.7317
	67.9367	698.702	5.48631	73.711
	67.98	699.118	5.484	73.68
	68.0233	699.533	5.48354	73.6738
	68.0667	699.956	5.48285	73.6645
	68.11	700.374	5.48115	73.6417
	68.1533	700.794	5.47954	73.62
	68.1967	701.217	5.47723	73.589
	68.24	701.635	5.476	73.5725
	68.2833	702.057	5.47346	73.5384
	68.3267	702.482	5.47269	73.528
	68.37	702.899	5.47115	73.5073
	68.4133	703.326	5.47031	73.496
	68.4567	703.742	5.46954	73.4857
	68.5	704.159	5.46808	73.4661
	68.5433	704.571	5.46662	73.4465
	68.5867	704.99	5.46477	73.4216
	68.63	705.409	5.46331	73.402
	68.6733	705.82	5.46115	73.373
	68.7167	706.229	5.45992	73.3564
	68.76	706.64	5.45738	73.3223
	68.8033	707.048	5.45608	73.3049
	68.8467	707.473	5.45423	73.28
	68.89	707.883	5.45338	73.2686
	68.9333	708.304	5.45192	73.249
	68.9767	708.717	5.45061	73.2314
	69.02	709.135	5.44946	73.2159
	69.0633	709.548	5.44754	73.1901
	69.1067	709.962	5.44623	73.1725
	69.15	710.377	5.44462	73.1509
	69.1933	710.789	5.44323	73.1322
	69.2367	711.204	5.442	73.1157
	69.28	711.618	5.44085	73.1002
	69.3233	712.031	5.43938	73.0805
	69.3667	712.449	5.43808	73.063
	69.41	712.867	5.43608	73.0361
	69.4533	713.284	5.43385	73.0062
	69.4967	713.706	5.43269	72.9906
	69.54	714.125	5.43046	72.9606
	69.5833	714.541	5.42892	72.9399
	69.6267	714.966	5.42708	72.9152
	69.67	715.384	5.42623	72.9038
	69.7133	715.803	5.42469	72.8831
	69.7567	716.228	5.423	72.8604
	69.8	716.653	5.42138	72.8386
	69.8433	717.069	5.42092	72.8325
	69.8867	717.49	5.41923	72.8098
	69.93	717.907	5.41746	72.786
	69.9733	718.325	5.41677	72.7767
	70.0167	718.739	5.41492	72.7518
	70.06	719.153	5.41423	72.7426
	70.1033	719.566	5.41308	72.7271
	70.1467	719.981	5.41154	72.7064
	70.19	720.396	5.40992	72.6847
	70.2333	720.81	5.40877	72.6692
	70.2767	721.224	5.40662	72.6403
	70.32	721.638	5.40554	72.6258
	70.3633	722.05	5.40354	72.599
	70.4067	722.469	5.40192	72.5772
	70.45	722.887	5.40038	72.5565
	70.4933	723.3	5.39915	72.54
	70.5367	723.715	5.39792	72.5234
	70.58	724.128	5.39654	72.5049
	70.6233	724.543	5.39523	72.4873
	70.6667	724.951	5.39385	72.4688
	70.71	725.358	5.39208	72.445
	70.7533	725.764	5.39192	72.4428
	70.7967	726.171	5.39092	72.4294
	70.84	726.583	5.38992	72.416
	70.8833	726.993	5.38815	72.3922
	70.9267	727.402	5.38569	72.3591
	70.97	727.808	5.38408	72.3375
	71.0133	728.22	5.38246	72.3157
	71.0567	728.622	5.38177	72.3065
	71.1	729.026	5.38046	72.2889
	71.1433	729.433	5.37923	72.2723
	71.1867	729.839	5.37761	72.2506
	71.23	730.244	5.37608	72.23
	71.2733	730.646	5.37523	72.2186
	71.3167	731.051	5.37385	72.2001
	71.36	731.448	5.37315	72.1906
	71.4033	731.844	5.37123	72.1649
	71.4467	732.248	5.36992	72.1473
	71.49	732.649	5.36846	72.1276
	71.5333	733.052	5.36731	72.1122
	71.5767	733.457	5.36554	72.0884
	71.62	733.863	5.36354	72.0615
	71.6633	734.269	5.36223	72.0439
	71.7067	734.675	5.36085	72.0254
	71.75	735.08	5.35946	72.0067
	71.7933	735.48	5.35769	71.9829
	71.8367	735.883	5.35692	71.9726
	71.88	736.288	5.35546	71.953
	71.9233	736.687	5.35492	71.9457
	71.9667	737.087	5.35346	71.9261
	72.01	737.492	5.35192	71.9054
	72.0533	737.906	5.34946	71.8724
	72.0967	738.311	5.34869	71.862
	72.14	738.723	5.34785	71.8507
	72.1833	739.131	5.34608	71.827
	72.2267	739.542	5.34477	71.8094
	72.27	739.943	5.34331	71.7897
	72.3133	740.354	5.34138	71.7638
	72.3567	740.763	5.34077	71.7556
	72.4	741.172	5.33923	71.7349
	72.4433	741.573	5.33738	71.7101
	72.4867	741.983	5.33585	71.6895
	72.53	742.392	5.33515	71.6801
	72.5733	742.797	5.33385	71.6626
	72.6167	743.197	5.33231	71.6419
	72.66	743.6	5.33115	71.6264
	72.7033	744.001	5.32969	71.6067
	72.7467	744.406	5.32846	71.5902
	72.79	744.812	5.32808	71.5851
	72.8333	745.214	5.32715	71.5726
	72.8767	745.621	5.32538	71.5488
	72.92	746.027	5.32331	71.521
	72.9633	746.433	5.322	71.5034
	73.0067	746.839	5.31977	71.4735
	73.05	747.244	5.31854	71.4569
	73.0933	747.646	5.31777	71.4466
	73.1367	748.049	5.31638	71.4279
	73.18	748.455	5.315	71.4094
	73.2233	748.857	5.315	71.4094
	73.2667	749.264	5.31269	71.3783
	73.31	749.667	5.31108	71.3567
	73.3533	750.076	5.30992	71.3411
	73.3967	750.487	5.30877	71.3257
	73.44	750.895	5.30761	71.3101
	73.4833	751.307	5.30554	71.2823
	73.5267	751.719	5.30408	71.2627
	73.57	752.131	5.303	71.2482
	73.6133	752.541	5.30154	71.2285
	73.6567	752.95	5.29892	71.1933
	73.7	753.361	5.29746	71.1737
	73.7433	753.77	5.29623	71.1572
	73.7867	754.175	5.29538	71.1458
	73.83	754.588	5.29415	71.1292
	73.8733	754.997	5.29238	71.1055
	73.9167	755.405	5.29108	71.088
	73.96	755.815	5.28931	71.0642
	74.0033	756.226	5.28723	71.0363
	74.0467	756.635	5.28615	71.0218
	74.09	757.043	5.28485	71.0043
	74.1333	757.448	5.28308	70.9805
	74.1767	757.848	5.28192	70.9649
	74.22	758.253	5.28131	70.9567
	74.2633	758.666	5.27961	70.9339
	74.3067	759.072	5.27792	70.9112
	74.35	759.472	5.27654	70.8927
	74.3933	759.894	5.27538	70.8771
	74.4367	760.299	5.27454	70.8658
	74.48	760.696	5.27261	70.8398
	74.5233	761.106	5.27192	70.8306
	74.5667	761.515	5.26992	70.8037
	74.61	761.917	5.26815	70.7799
	74.6533	762.322	5.26723	70.7676
	74.6967	762.733	5.26585	70.749
	74.74	763.139	5.264	70.7242
	74.7833	763.549	5.262	70.6973
	74.8267	763.955	5.261	70.6839
	74.87	764.364	5.25915	70.659
	74.9133	764.773	5.25746	70.6363
	74.9567	765.185	5.25623	70.6198
	75	765.592	5.25562	70.6116
	75.0433	766.001	5.25369	70.5857
	75.0867	766.409	5.25138	70.5546
	75.13	766.821	5.25085	70.5475
	75.1733	767.226	5.24938	70.5277
	75.2167	767.639	5.24854	70.5165
	75.26	768.049	5.24592	70.4813
	75.3033	768.453	5.24485	70.4669
	75.3467	768.859	5.24323	70.4451
	75.39	769.267	5.24138	70.4203
	75.4333	769.675	5.24	70.4017
	75.4767	770.079	5.23838	70.38
	75.52	770.488	5.23692	70.3603
	75.5633	770.901	5.23592	70.3469
	75.6067	771.313	5.23454	70.3284
	75.65	771.72	5.23246	70.3004
	75.6933	772.131	5.23146	70.287
	75.7367	772.539	5.22946	70.2601
	75.78	772.949	5.22808	70.2416
	75.8233	773.358	5.22608	70.2147
	75.8667	773.768	5.22462	70.1951
	75.91	774.179	5.22238	70.165
	75.9533	774.591	5.22069	70.1423
	75.9967	774.995	5.21892	70.1185
	76.04	775.404	5.21815	70.1082
	76.0833	775.813	5.21692	70.0916
	76.1267	776.219	5.21523	70.0689
	76.17	776.629	5.21408	70.0535
	76.2133	777.04	5.21215	70.0275
	76.2567	777.447	5.21023	70.0017
	76.3	777.857	5.20862	69.9801
	76.3433	778.268	5.20777	69.9687
	76.3867	778.678	5.20531	69.9356
	76.43	779.089	5.20377	69.915
	76.4733	779.498	5.20262	69.8995
	76.5167	779.914	5.20162	69.8861
	76.56	780.326	5.20115	69.8798
	76.6033	780.736	5.20054	69.8716
	76.6467	781.143	5.19854	69.8447
	76.69	781.55	5.19669	69.8198
	76.7333	781.961	5.19431	69.7879
	76.7767	782.368	5.19315	69.7723
	76.82	782.77	5.19169	69.7527
	76.8633	783.177	5.191	69.7434
	76.9067	783.58	5.19023	69.733
	76.95	783.987	5.18892	69.7154
	76.9933	784.395	5.18769	69.6989
	77.0367	784.805	5.18508	69.6638
	77.08	785.214	5.184	69.6493
	77.1233	785.617	5.18246	69.6286
	77.1667	786.023	5.18131	69.6132
	77.21	786.428	5.17908	69.5832
	77.2533	786.837	5.17823	69.5718
	77.2967	787.239	5.17662	69.5502
	77.34	787.646	5.17508	69.5295
	77.3833	788.048	5.17415	69.517
	77.4267	788.445	5.173	69.5015
	77.47	788.851	5.17131	69.4788
	77.5133	789.252	5.17	69.4612
	77.5567	789.657	5.16885	69.4458
	77.6	790.057	5.16808	69.4354
	77.6433	790.457	5.16685	69.4189
	77.6867	790.855	5.165	69.3941
	77.73	791.252	5.16415	69.3826
	77.7733	791.647	5.16292	69.3661
	77.8167	792.05	5.16138	69.3454
	77.86	792.448	5.16054	69.3341
	77.9033	792.846	5.15862	69.3083
	77.9467	793.246	5.15731	69.2907
	77.99	793.651	5.15623	69.2762
	78.0333	794.054	5.15461	69.2545
	78.0767	794.456	5.15292	69.2318
	78.12	794.864	5.15208	69.2205
	78.1633	795.269	5.152	69.2194
	78.2067	795.671	5.15115	69.208
	78.25	796.079	5.15	69.1925
	78.2933	796.482	5.14877	69.176
	78.3367	796.889	5.14731	69.1564
	78.38	797.292	5.14585	69.1368
	78.4233	797.696	5.14462	69.1202
	78.4667	798.104	5.14331	69.1026
	78.51	798.512	5.14192	69.084
	78.5533	798.921	5.14085	69.0696
	78.5967	799.324	5.13954	69.052
	78.64	799.727	5.13885	69.0427
	78.6833	800.135	5.13769	69.0271
	78.7267	800.537	5.13731	69.022
	78.77	800.942	5.13654	69.0117
	78.8133	801.345	5.13508	68.9921
	78.8567	801.738	5.13277	68.961
	78.9	802.138	5.13169	68.9465
	78.9433	802.545	5.12954	68.9176
	78.9867	802.951	5.12977	68.9207
	79.03	803.357	5.12815	68.899
	79.0733	803.758	5.12669	68.8793
	79.1167	804.164	5.12546	68.8628
	79.16	804.564	5.12431	68.8474
	79.2033	804.975	5.12277	68.8267
	79.2467	805.371	5.12192	68.8153
	79.29	805.779	5.12185	68.8143
	79.3333	806.188	5.12077	68.7998
	79.3767	806.587	5.11885	68.774
	79.42	806.981	5.11762	68.7575
	79.4633	807.384	5.11654	68.743
	79.5067	807.788	5.11515	68.7243
	79.55	808.186	5.11438	68.714
	79.5933	808.596	5.11338	68.7005
	79.6367	808.993	5.112	68.682
	79.68	809.399	5.11085	68.6665
	79.7233	809.805	5.10946	68.6479
	79.7667	810.208	5.10846	68.6344
	79.81	810.615	5.10708	68.6159
	79.8533	811.014	5.10554	68.5952
	79.8967	811.414	5.10462	68.5828
	79.94	811.815	5.10315	68.5631
	79.9833	812.221	5.10223	68.5507
	80.0267	812.622	5.10154	68.5414
	80.07	813.012	5.10046	68.5269
	80.1133	813.412	5.09823	68.497
	80.1567	813.818	5.09677	68.4774
	80.2	814.221	5.09662	68.4753
	80.2433	814.627	5.09638	68.4721
	80.2867	815.037	5.09477	68.4505
	80.33	815.434	5.09408	68.4412
	80.3733	815.836	5.09285	68.4247
	80.4167	816.241	5.09169	68.4091
	80.46	816.644	5.09023	68.3895
	80.5033	817.051	5.08869	68.3688
	80.5467	817.455	5.08785	68.3575
	80.59	817.863	5.08662	68.341
	80.6333	818.275	5.08523	68.3223
	80.6767	818.683	5.08431	68.31
	80.72	819.089	5.08354	68.2996
	80.7633	819.497	5.08261	68.2871
	80.8067	819.902	5.08138	68.2706
	80.85	820.31	5.07962	68.2469
	80.8933	820.719	5.07854	68.2324
	80.9367	821.124	5.07823	68.2283
	80.98	821.525	5.077	68.2117
	81.0233	821.919	5.07569	68.1941
	81.0667	822.326	5.07492	68.1838
	81.11	822.734	5.073	68.158
	81.1533	823.137	5.071	68.1311
	81.1967	823.534	5.06954	68.1115
	81.24	823.937	5.06908	68.1053
	81.2833	824.337	5.06785	68.0888
	81.3267	824.739	5.066	68.064
	81.37	825.146	5.06431	68.0412
	81.4133	825.548	5.06331	68.0278
	81.4567	825.953	5.06208	68.0113
	81.5	826.351	5.06015	67.9854
	81.5433	826.751	5.05923	67.973
	81.5867	827.156	5.05685	67.941
	81.63	827.554	5.05469	67.912
	81.6733	827.949	5.053	67.8893
	81.7167	828.351	5.05115	67.8644
	81.76	828.745	5.04977	67.8459
	81.8033	829.145	5.04654	67.8025
	81.8467	829.542	5.04354	67.7622
	81.89	829.943	5.04031	67.7188
	81.9333	830.341	5.03715	67.6763
	81.9767	830.733	5.03308	67.6217
	82.02	831.133	5.02885	67.5648
	82.0633	831.535	5.02415	67.5017
	82.1067	831.935	5.02038	67.451
	82.15	832.341	5.01746	67.4118
	82.1933	832.741	5.01369	67.3611
	82.2367	833.145	5.00931	67.3023
	82.28	833.549	5.00585	67.2558
	82.3233	833.95	5.00192	67.203
	82.3667	834.353	4.99808	67.1514
	82.41	834.747	4.99431	67.1008
	82.4533	835.149	4.99031	67.047
	82.4967	835.545	4.98646	66.9953
	82.54	835.947	4.98231	66.9395
	82.5833	836.343	4.97846	66.8878
	82.6267	836.745	4.97385	66.8259
	82.67	837.144	4.97008	66.7752
	82.7133	837.549	4.96631	66.7246
	82.7567	837.957	4.96254	66.6739
	82.8	838.356	4.95985	66.6378
	82.8433	838.766	4.95677	66.5964
	82.8867	839.173	4.95362	66.5541
	82.93	839.59	4.95069	66.5147
	82.9733	840.013	4.94769	66.4744
	83.0167	840.432	4.94323	66.4145
	83.06	840.847	4.94077	66.3814
	83.1033	841.268	4.93785	66.3422
	83.1467	841.685	4.93585	66.3153
	83.19	842.11	4.93246	66.2698
	83.2333	842.529	4.93031	66.2409
	83.2767	842.942	4.92723	66.1995
	83.32	843.36	4.92454	66.1634
	83.3633	843.772	4.92162	66.1241
	83.4067	844.181	4.91931	66.0931
	83.45	844.593	4.91631	66.0528
	83.4933	844.995	4.91354	66.0156
	83.5367	845.4	4.91131	65.9856
	83.58	845.804	4.90885	65.9526
	83.6233	846.208	4.90669	65.9236
	83.6667	846.612	4.90454	65.8947
	83.71	847.017	4.90162	65.8554
	83.7533	847.422	4.899	65.8202
	83.7967	847.828	4.89638	65.785
	83.84	848.239	4.89469	65.7623
	83.8833	848.639	4.89192	65.7251
	83.9267	849.046	4.88977	65.6962
	83.97	849.45	4.88669	65.6548
	84.0133	849.857	4.88508	65.6332
	84.0567	850.255	4.88308	65.6063
	84.1	850.656	4.88154	65.5857
	84.1433	851.051	4.87962	65.5599
	84.1867	851.453	4.87715	65.5267
	84.23	851.852	4.87446	65.4905
	84.2733	852.253	4.87269	65.4667
	84.3167	852.65	4.87092	65.443
	84.36	853.054	4.86831	65.4079
	84.4033	853.455	4.866	65.3769
	84.4467	853.858	4.86469	65.3593
	84.49	854.258	4.86346	65.3427
	84.5333	854.66	4.86131	65.3139
	84.5767	855.065	4.85908	65.2839
	84.62	855.463	4.85708	65.257
	84.6633	855.868	4.85392	65.2146
	84.7067	856.267	4.85177	65.1857
	84.75	856.673	4.849	65.1485
	84.7933	857.084	4.84723	65.1247
	84.8367	857.488	4.84569	65.104
	84.88	857.899	4.84308	65.0689
	84.9233	858.306	4.841	65.041
	84.9667	858.714	4.839	65.0141
	85.01	859.119	4.83685	64.9852
	85.0533	859.523	4.83523	64.9635
	85.0967	859.924	4.83315	64.9355
	85.14	860.326	4.83146	64.9128
	85.1833	860.727	4.82862	64.8746
	85.2267	861.131	4.82654	64.8467
	85.27	861.541	4.82385	64.8106
	85.3133	861.944	4.82154	64.7795
	85.3567	862.341	4.81938	64.7505
	85.4	862.74	4.81692	64.7175
	85.4433	863.148	4.81446	64.6844
	85.4867	863.551	4.81269	64.6606
	85.53	863.952	4.81115	64.6399
	85.5733	864.35	4.80962	64.6194
	85.6167	864.752	4.80808	64.5987
	85.66	865.151	4.80538	64.5624
	85.7033	865.551	4.80277	64.5273
	85.7467	865.951	4.80162	64.5119
	85.79	866.351	4.79969	64.486
	85.8333	866.747	4.79754	64.4571
	85.8767	867.152	4.795	64.4229
	85.92	867.551	4.79262	64.391
	85.9633	867.951	4.79038	64.3609
	86.0067	868.349	4.78877	64.3392
[truncated: 148 more rows]
