# Supplementary material for: Preparation, thermal stability and electrical transport properties of vaesite, NiS 2
Source: PeerJ journal article supplement (doi:10.7717/peerj-matsci.2), 2019-11-15
Supplement: TGA_NiS2_HP.xlsx [file TGA_NiS2_HP.xlsx]

## Sheet: Folha1
CLOSED
Version	2
Language	English
Mode	TGA 1000 °C
Run	1
RunSerial	411
Instrument	TGA Q500 V20.13 Build 39
Module	TGA
InstSerial	0500-2207
Operator	MHC, LMF
File	\\Lferreira-l-pc\ta\Data\TGA\Experimental\20190524\20190524_T01.001
FurnaceType	Standard
Sample	#1928-2
Size	14.283	mg
ProcName	Ramp
Method	Ramp
Comment	NiS2-HP
Xcomment	Pan: Platinum
Xcomment	Gas1: Nitrogen
Xcomment	Gas2: Nitrogen
Xcomment	Balance Gas: Nitrogen 60.0 ml/min
Xcomment	Sample Gas: Nitrogen 60.0 ml/min
Text
Kcell	1
TempCal	3	pts	24.13	24.80,357.36	358.28,755.01	769.85
InstCalDate	Weight Date 2014-10-03 15:48:25
Controls	Gas 1 Event Off Sampling 0.5
Nsig	5
Sig1	Time (min)
Sig2	Temperature (°C)
Sig3	Weight (mg)
Sig4	Balance Purge Flow (mL/min)
Sig5	Sample Purge Flow (mL/min)
AirCoolTime	10.0 min
AutoAnalysis	Off
MacroFile
Date	2019-05-24
Time	12:30:57
OrgMethod	1: Ramp 10.00 °C/min to 900.00 °C
OrgFile	C:\TA\Data\TGA\Experimental\20190524\20190524_T01.001
StartOfData
0.00246667	21.0209	14.283	60.0408	59.9874	99.9999
0.00416667	21.0244	14.2833	59.9666	59.9992	100.002
0.0125	21.0268	14.2834	60.0108	60.0162	100.003
0.0208333	21.0298	14.2835	60.0131	59.9888	100.004
0.0291667	21.0298	14.2837	59.9621	59.9816	100.005
0.0375	21.0376	14.2837	60.0444	60.0026	100.005
0.0458333	21.0426	14.2835	59.9836	60.0241	100.004
0.0541667	21.0499	14.2836	60.0018	59.9759	100.004
0.0625	21.058	14.2838	60.0161	60.0236	100.006
0.0708333	21.0644	14.2838	59.9791	59.9935	100.006
0.0791667	21.0754	14.2838	59.9784	60.0098	100.006
0.0875	21.0878	14.2841	59.9884	59.9976	100.007
0.0958333	21.1012	14.2844	60.007	59.9946	100.01
0.104167	21.1134	14.2843	60.0107	59.9786	100.009
0.1125	21.1242	14.2841	60.0264	60.0319	100.008
0.120833	21.1363	14.2841	59.9603	59.9897	100.008
0.129167	21.1567	14.2841	60.0161	59.9853	100.007
0.1375	21.1719	14.2837	60.0151	60.0379	100.005
0.145833	21.1913	14.2835	60.021	59.961	100.004
0.154167	21.21	14.2837	59.987	59.9979	100.005
0.1625	21.2287	14.2838	59.9577	60.0171	100.006
0.170833	21.2517	14.2837	60.0279	59.9838	100.005
0.179167	21.274	14.2839	60.0095	60.0157	100.006
0.1875	21.2977	14.2843	60.0026	59.9811	100.009
0.195833	21.3203	14.2844	59.9964	60.0076	100.01
0.204167	21.348	14.2842	59.984	59.9727	100.009
0.2125	21.3776	14.2843	60.0045	60.0393	100.009
0.220833	21.4056	14.2845	60.0065	60.0143	100.011
0.229167	21.4339	14.2845	59.992	60.0041	100.011
0.2375	21.4652	14.2844	59.9756	59.9767	100.01
0.245833	21.4992	14.2845	60.0107	60.0047	100.01
0.254167	21.5309	14.2848	60.0204	59.9934	100.013
0.2625	21.5658	14.2849	59.9624	59.9994	100.013
0.270833	21.6006	14.2848	60.0234	60.0099	100.013
0.279167	21.6373	14.285	60.0204	59.9895	100.014
0.2875	21.6751	14.2852	59.9674	59.9843	100.015
0.295833	21.7142	14.2851	60.0296	60.0068	100.014
0.304167	21.7533	14.2849	60.0114	60.0016	100.014
0.3125	21.7963	14.2852	59.9903	59.9951	100.015
0.320833	21.8376	14.2855	60.0038	60.0188	100.018
0.329167	21.8786	14.2855	59.9655	59.9709	100.017
0.3375	21.9264	14.2855	60.0299	60.0541	100.017
0.345833	21.9704	14.2856	60.0115	59.9701	100.018
0.354167	22.0161	14.2856	59.9967	59.9828	100.018
0.3625	22.0622	14.2853	59.973	60.0189	100.016
0.370833	22.1104	14.2851	59.9965	60.0002	100.014
0.379167	22.1607	14.2851	60.0149	60.0108	100.015
0.3875	22.2117	14.285	59.9822	59.994	100.014
0.395833	22.2638	14.2847	60.0282	59.9972	100.012
0.404167	22.3147	14.2846	59.99	60.0148	100.011
0.4125	22.3685	14.2848	59.9797	59.9838	100.012
0.420833	22.4226	14.2847	60.0012	59.9783	100.012
0.429167	22.4805	14.2844	59.9878	60.0382	100.01
0.4375	22.5335	14.2843	60.0014	59.9872	100.009
0.445833	22.5898	14.2845	60.0329	59.9883	100.01
0.454167	22.648	14.2844	60.0033	59.9866	100.01
0.4625	22.7072	14.2839	59.9992	60.015	100.006
0.470833	22.7657	14.284	59.9799	59.9815	100.007
0.479167	22.8282	14.2845	60.0254	59.9981	100.01
0.4875	22.8904	14.2846	59.9616	60.0036	100.011
0.495833	22.9499	14.2846	60.0353	60.0029	100.011
0.504167	23.0137	14.2848	60.0002	60.0281	100.013
0.5125	23.0787	14.2851	60.0137	59.9756	100.014
0.520833	23.14	14.2853	59.9722	60.0065	100.016
0.529167	23.2042	14.2858	60.001	59.9998	100.019
0.5375	23.2711	14.2855	59.9768	60.0108	100.018
0.545833	23.3379	14.2854	60.0152	59.9774	100.017
0.554167	23.4046	14.2852	60.0082	60.0088	100.015
0.5625	23.4728	14.2851	59.9898	60.0228	100.014
0.570833	23.5394	14.2851	60.0394	59.9786	100.015
0.579167	23.608	14.2851	59.9971	59.9989	100.015
0.5875	23.675	14.2847	59.9739	60.0085	100.012
0.595833	23.7465	14.2849	59.9887	59.9926	100.013
0.604167	23.8173	14.2853	60.0215	59.9971	100.016
0.6125	23.8875	14.2854	60.0226	60.0153	100.017
0.620833	23.9583	14.286	60.0364	60.0145	100.021
0.629167	24.0323	14.2863	59.9368	59.9829	100.023
0.6375	24.1042	14.2859	60.0117	60.0004	100.02
0.645833	24.1784	14.2853	60.0186	60.0063	100.016
0.654167	24.2502	14.285	59.9473	60.0151	100.014
0.6625	24.3273	14.2851	59.9883	59.9829	100.015
0.670833	24.4013	14.2851	60.0507	60.004	100.015
0.679167	24.4757	14.2851	59.9629	60.0056	100.014
0.6875	24.552	14.285	60.0308	60.0006	100.014
0.695833	24.6251	14.2851	59.9983	59.9807	100.015
0.704167	24.7037	14.2851	59.9858	60.008	100.015
0.7125	24.7796	14.285	60.0082	60.0138	100.014
0.720833	24.8573	14.285	60.0153	59.9855	100.014
0.729167	24.9347	14.2851	59.9722	59.9982	100.015
0.7375	25.0128	14.2851	60.0228	60.0198	100.015
0.745833	25.0888	14.2851	60.0053	59.984	100.015
0.754167	25.1701	14.2852	59.9838	60.0113	100.016
0.7625	25.2501	14.2853	59.9899	59.9945	100.016
0.770833	25.3283	14.2854	60.049	60.0021	100.017
0.779167	25.4075	14.2856	59.945	60.0005	100.018
0.7875	25.487	14.2857	60.0079	60.0032	100.019
0.795833	25.5675	14.2857	60.0277	59.9776	100.019
0.804167	25.6484	14.2855	59.948	60.0359	100.018
0.8125	25.7267	14.2853	60.0112	59.9569	100.016
0.820833	25.8092	14.2852	60.0304	60.0393	100.016
0.829167	25.889	14.2849	59.9554	59.9683	100.013
0.8375	25.971	14.2843	60.0469	60.0157	100.009
0.845833	26.0534	14.2842	60.0106	60.0037	100.008
0.854167	26.129	14.2841	60.0204	59.9943	100.008
0.8625	26.2113	14.284	59.9605	60.003	100.007
0.870833	26.2962	14.2838	60.0234	59.9965	100.005
0.879167	26.3783	14.2837	59.9793	59.9828	100.005
0.8875	26.4604	14.2838	59.9889	60.0437	100.006
0.895833	26.5428	14.2839	60.0083	59.9865	100.006
0.904167	26.625	14.284	59.9834	60.0054	100.007
0.9125	26.7108	14.2843	60.0091	59.9654	100.009
0.920833	26.7893	14.2845	60.0057	60.0378	100.011
0.929167	26.8725	14.2845	59.9833	59.9827	100.011
0.9375	26.9547	14.2844	60.0378	60.0085	100.01
0.945833	27.0405	14.2845	59.9643	59.998	100.01
0.954167	27.1226	14.2845	59.9952	59.9796	100.011
0.9625	27.2059	14.2845	59.993	59.9863	100.01
0.970833	27.2897	14.2846	60.0495	60.0325	100.011
0.979167	27.3723	14.2848	59.966	59.9555	100.012
0.9875	27.4572	14.2849	60.0117	60.0198	100.013
0.995833	27.5412	14.2848	60.0177	60.0286	100.012
1.00417	27.6236	14.2847	59.9755	59.968	100.012
1.0125	27.7078	14.2849	60.0002	60.0126	100.013
1.02083	27.7914	14.285	60.0228	60.0018	100.014
1.02917	27.8726	14.285	59.9939	59.9829	100.014
1.0375	27.9579	14.2851	59.9779	59.995	100.015
1.04583	28.0395	14.2853	60.0354	60.0283	100.016
1.05417	28.1237	14.2852	59.9984	59.995	100.015
1.0625	28.2081	14.2849	59.9881	59.9899	100.013
1.07083	28.2923	14.2846	60.0069	59.9884	100.011
1.07917	28.3749	14.2844	59.9675	60.0209	100.01
1.0875	28.4588	14.284	60.0213	60.0291	100.007
1.09583	28.5429	14.2838	59.9815	59.9693	100.005
1.10417	28.6261	14.2839	59.993	59.9778	100.006
1.1125	28.7102	14.2841	60.0244	59.9953	100.008
1.12083	28.7949	14.2841	59.9803	60.0346	100.008
1.12917	28.8791	14.284	60.0263	59.9655	100.007
1.1375	28.9606	14.284	59.9639	60.0188	100.007
1.14583	29.0437	14.284	60.0541	60.0174	100.007
1.15417	29.1265	14.2841	59.9908	59.9821	100.008
1.1625	29.2114	14.2842	59.9892	59.994	100.008
1.17083	29.294	14.2842	59.991	60.0012	100.009
1.17917	29.3771	14.2842	59.9638	60.0082	100.008
1.1875	29.4602	14.2839	60.0358	60.0237	100.006
1.19583	29.5444	14.2835	60.0052	59.9845	100.004
1.20417	29.6296	14.2834	59.9569	59.9815	100.003
1.2125	29.7098	14.2835	60.031	60.0238	100.003
1.22083	29.794	14.2834	60.0402	60.0048	100.003
1.22917	29.8763	14.2835	59.9547	59.9952	100.003
1.2375	29.9564	14.2835	60.0214	59.9954	100.003
1.24583	30.0415	14.2834	60.002	60.0098	100.003
1.25417	30.1231	14.2835	59.9745	59.9859	100.003
1.2625	30.2055	14.2837	59.9888	59.9937	100.005
1.27083	30.2927	14.284	59.9878	59.9836	100.007
1.27917	30.3729	14.2842	60.027	60.0478	100.009
1.2875	30.4543	14.2844	60.0259	59.9798	100.01
1.29583	30.5394	14.2845	59.9475	59.9994	100.01
1.30417	30.6188	14.2845	59.9979	59.9864	100.01
1.3125	30.7046	14.2843	60.0487	59.9865	100.009
1.32083	30.7856	14.2841	60.0006	60.0172	100.008
1.32917	30.8675	14.284	59.9964	60.001	100.007
1.3375	30.9501	14.2839	59.9748	60.0086	100.007
1.34583	31.0297	14.2838	60.0188	60.0147	100.005
1.35417	31.1131	14.2837	60.0052	59.9978	100.005
1.3625	31.194	14.2837	60.007	59.9711	100.005
1.37083	31.2782	14.2837	59.9702	60.0289	100.005
1.37917	31.3585	14.2838	60.0287	59.9928	100.005
1.3875	31.4405	14.2838	59.9649	59.9714	100.006
1.39583	31.523	14.2837	60.0418	60.0415	100.005
1.40417	31.6024	14.2836	59.968	59.9891	100.005
1.4125	31.6852	14.2836	60.0045	60.0232	100.004
1.42083	31.7686	14.2837	60.0316	59.9687	100.005
1.42917	31.8476	14.2836	59.9563	59.9941	100.004
1.4375	31.9318	14.2836	60.0068	59.9953	100.004
1.44583	32.0125	14.2835	60.0335	60.0044	100.004
1.45417	32.0951	14.2833	59.9773	60.0128	100.002
1.4625	32.1746	14.2831	59.9783	59.9774	100.001
1.47083	32.2575	14.2828	60.0239	60.0232	99.9988
1.47917	32.3381	14.2828	59.9871	59.9931	99.9988
1.4875	32.421	14.283	60.0142	59.9781	99.9997
1.49583	32.5006	14.283	59.9941	60.0093	100
1.50417	32.5817	14.2831	59.9893	60.0238	100.001
1.5125	32.6636	14.2833	60.0102	59.952	100.002
1.52083	32.7432	14.2835	59.9816	60.0391	100.004
1.52917	32.8254	14.2836	59.9835	59.9963	100.004
1.5375	32.906	14.2838	60.025	59.99	100.006
1.54583	32.9878	14.284	60.0254	59.983	100.007
1.55417	33.0676	14.2841	59.983	60.004	100.008
1.5625	33.1488	14.2841	60.0255	60.0223	100.007
1.57083	33.229	14.2839	59.9757	59.998	100.006
1.57917	33.3129	14.2839	60.0189	60.0126	100.006
1.5875	33.3929	14.2839	60.002	59.9842	100.006
1.59583	33.4726	14.2837	59.9805	60.0203	100.005
1.60417	33.5522	14.2835	60.0126	59.9614	100.003
1.6125	33.6316	14.2834	59.9849	59.9952	100.003
1.62083	33.7123	14.2833	59.9982	60.0472	100.002
1.62917	33.7915	14.2831	60.0232	59.9622	100.001
1.6375	33.8734	14.283	59.9893	60.0354	100
1.64583	33.9527	14.2831	59.9796	60.0075	100
1.65417	34.0346	14.2832	59.9702	59.9686	100.001
1.6625	34.1159	14.2833	60.0547	60.0144	100.002
1.67083	34.1953	14.2834	59.9931	59.9986	100.003
1.67917	34.2759	14.2835	59.9834	59.9977	100.004
1.6875	34.3561	14.2838	60.0059	59.9891	100.006
1.69583	34.4371	14.2841	59.9751	59.992	100.007
1.70417	34.5157	14.2842	60.0133	59.9844	100.009
1.7125	34.5982	14.2842	59.9858	60.0338	100.009
1.72083	34.6762	14.2839	60.0369	60.0178	100.006
1.72917	34.7557	14.2836	59.983	59.973	100.004
1.7375	34.8364	14.2834	59.9995	60.0231	100.003
1.74583	34.9147	14.2833	60.0232	59.9917	100.002
1.75417	34.9951	14.2831	60.0236	59.9894	100.001
1.7625	35.0763	14.2831	59.9702	60.0182	100.001
1.77083	35.1549	14.2833	59.9918	60.0082	100.002
1.77917	35.2336	14.2834	59.9961	60.0012	100.003
1.7875	35.3145	14.2836	60.0222	59.9441	100.004
1.79583	35.3941	14.2837	60.0039	60.0551	100.005
1.80417	35.4733	14.2839	59.9687	59.9665	100.006
1.8125	35.554	14.284	59.9895	60.022	100.007
1.82083	35.6339	14.2839	60.0234	60.0025	100.006
1.82917	35.7107	14.2836	60.029	59.9929	100.004
1.8375	35.793	14.2834	59.9676	59.9993	100.003
1.84583	35.871	14.2831	59.9972	59.9684	100.001
1.85417	35.9505	14.2829	60.0113	60.0216	99.9992
1.8625	36.0289	14.2828	59.9867	60.0106	99.9985
1.87083	36.1084	14.2828	60.0142	59.9859	99.9983
1.87917	36.1876	14.2828	60.0283	60.0104	99.9982
1.8875	36.2685	14.2828	59.9899	60.0211	99.9982
1.89583	36.3463	14.2827	59.9646	59.9686	99.9978
1.90417	36.427	14.2824	60.0044	59.9869	99.9957
1.9125	36.5079	14.2824	60.017	60.0411	99.996
1.92083	36.5868	14.2826	59.9896	59.967	99.9973
1.92917	36.6652	14.283	59.9956	59.9945	99.9999
1.9375	36.7432	14.2837	59.9857	60.0319	100.005
1.94583	36.8257	14.284	60.011	60.0037	100.007
1.95417	36.9024	14.2835	60.0145	59.9956	100.004
1.9625	36.9827	14.2829	59.9777	59.9999	99.999
1.97083	37.0607	14.2825	60.0052	59.9887	99.9962
1.97917	37.1418	14.2827	60.0024	60.001	99.9978
1.9875	37.2201	14.2833	60.0284	59.977	100.002
1.99583	37.2995	14.2841	59.9918	60.0386	100.007
2.00417	37.3775	14.2845	59.9719	59.9791	100.01
2.0125	37.4577	14.2846	60.0196	60.0174	100.011
2.02083	37.5369	14.2848	59.9997	59.987	100.013
2.02917	37.6157	14.285	60.0018	59.9951	100.014
2.0375	37.6973	14.2847	60.0165	59.9926	100.012
2.04583	37.7751	14.2842	59.9732	60.0142	100.008
2.05417	37.8567	14.284	60.0279	59.9977	100.007
2.0625	37.9354	14.284	59.9877	59.9892	100.007
2.07083	38.0166	14.2842	59.9787	60.0173	100.008
2.07917	38.0942	14.284	60.014	59.973	100.007
2.0875	38.1754	14.2835	60.0045	60.0037	100.004
2.09583	38.2534	14.2832	59.9888	60.0078	100.001
2.10417	38.3344	14.2829	60.0279	59.9998	99.9992
2.1125	38.4142	14.2829	59.9931	59.9802	99.999
2.12083	38.494	14.2829	60.0007	60.0102	99.9994
2.12917	38.5715	14.2829	60.0174	60.0152	99.9991
2.1375	38.6496	14.2828	59.9736	59.9847	99.9987
2.14583	38.7327	14.2831	60.001	60.0036	100.001
2.15417	38.8109	14.2836	59.9754	60.0164	100.004
2.1625	38.8921	14.2837	60.0097	60.0073	100.005
2.17083	38.9698	14.2835	60.0181	59.9795	100.004
2.17917	39.0497	14.2836	59.9578	60.0233	100.004
2.1875	39.1299	14.2837	60.0557	60.0057	100.005
2.19583	39.2063	14.2836	59.978	59.9857	100.004
2.20417	39.2866	14.2835	60.0212	59.9946	100.003
2.2125	39.3676	14.2833	59.9638	59.975	100.002
2.22083	39.447	14.2832	60.013	60.0308	100.001
2.22917	39.5255	14.2832	59.979	60.0023	100.001
2.2375	39.6071	14.2832	60.0322	60.0064	100.001
2.24583	39.6867	14.2832	60.0065	59.9881	100.001
2.25417	39.766	14.283	59.9929	59.9852	100
2.2625	39.8432	14.2828	59.9806	59.9788	99.9989
2.27083	39.9249	14.2826	59.9926	60.0391	99.9975
2.27917	40.0038	14.2825	59.9829	59.9832	99.9966
2.2875	40.0835	14.2825	60.056	59.999	99.9966
2.29583	40.1616	14.2826	59.984	60.0284	99.9972
2.30417	40.2417	14.2827	59.9763	59.9973	99.9978
2.3125	40.3227	14.2829	60.0107	59.9747	99.9991
2.32083	40.4033	14.283	60.0163	60.0245	100
2.32917	40.4819	14.2832	59.9823	60.0062	100.002
2.3375	40.5628	14.2833	60.0099	59.9691	100.002
2.34583	40.6413	14.2836	59.988	60.0306	100.004
2.35417	40.7197	14.2837	60.0115	59.9874	100.005
2.3625	40.7998	14.2838	60.0013	59.9671	100.006
2.37083	40.8798	14.2839	60.0028	60.0387	100.007
2.37917	40.9604	14.284	59.9664	59.9836	100.007
2.3875	41.0401	14.2841	60.0354	60.0099	100.008
2.39583	41.1199	14.2842	60.0011	59.9868	100.008
2.40417	41.2002	14.2843	60.0251	59.9901	100.009
2.4125	41.2809	14.2844	59.9597	59.9961	100.01
2.42083	41.3608	14.2845	60.0061	60.0387	100.01
2.42917	41.4412	14.2844	59.9957	60.0039	100.01
2.4375	41.5202	14.2843	60.0017	59.987	100.009
2.44583	41.6022	14.2841	60.0033	59.9997	100.008
2.45417	41.6805	14.2838	59.9924	59.995	100.005
2.4625	41.7604	14.2835	59.9916	60.003	100.004
2.47083	41.8419	14.2833	60.0193	59.9884	100.002
2.47917	41.92	14.2831	59.9637	60.0186	100.001
2.4875	41.9993	14.2829	60.0281	59.9897	99.9995
2.49583	42.0825	14.2828	60	60.0056	99.9989
2.50417	42.16	14.2829	59.9932	59.9871	99.9994
2.5125	42.2399	14.283	60.0212	59.996	99.9997
2.52083	42.3205	14.2829	59.9811	59.9967	99.9993
2.52917	42.4005	14.2831	60.0117	60.0171	100.001
2.5375	42.4793	14.2833	59.9981	59.9856	100.002
2.54583	42.5594	14.2834	59.9727	60.0028	100.003
2.55417	42.6412	14.2836	60.0443	59.9906	100.004
2.5625	42.7215	14.2836	59.9754	59.9925	100.004
2.57083	42.8018	14.2835	59.9943	59.9971	100.004
2.57917	42.8793	14.2834	60.024	60.0126	100.003
2.5875	42.9606	14.2834	59.9912	60.0148	100.003
2.59583	43.0411	14.2833	60.0102	60.0063	100.002
2.60417	43.1229	14.2834	59.9757	59.9731	100.003
2.6125	43.2033	14.2834	60.0106	60.0231	100.003
2.62083	43.2846	14.2832	59.9939	60.0111	100.001
2.62917	43.3652	14.2831	60.0144	60.0067	100.001
2.6375	43.4421	14.283	60.01	60.0029	100
2.64583	43.5239	14.283	59.9926	60.0033	100
2.65417	43.6037	14.283	59.9925	59.9843	100
2.6625	43.6847	14.2831	60.0144	60.0036	100.001
2.67083	43.766	14.2832	60.0037	59.9997	100.001
2.67917	43.8457	14.2831	60.0125	60.0154	100.001
2.6875	43.9252	14.2831	59.9694	59.9982	100.001
2.69583	44.0068	14.283	60.0192	59.9914	100
2.70417	44.09	14.2829	60.0029	59.974	99.9994
2.7125	44.1711	14.2829	59.9828	60.0308	99.9996
2.72083	44.2533	14.2831	59.9616	59.9897	100.001
2.72917	44.3326	14.2831	60.0636	60.0069	100.001
2.7375	44.4124	14.2833	59.9669	59.9975	100.002
2.74583	44.4943	14.2835	59.9926	59.9877	100.003
2.75417	44.5732	14.2836	60.0276	59.9928	100.004
2.7625	44.6548	14.2836	59.9977	60.0048	100.004
2.77083	44.7364	14.2836	60.0127	59.9911	100.004
2.77917	44.8159	14.2835	59.9667	60.0002	100.004
2.7875	44.8957	14.2834	60.0044	60.0045	100.003
2.79583	44.9739	14.2832	60.017	60.0119	100.001
2.80417	45.0553	14.283	59.9745	59.9995	99.9997
2.8125	45.1362	14.2828	60.033	59.9942	99.9989
2.82083	45.2165	14.2829	59.9855	60.0075	99.9994
2.82917	45.2998	14.283	59.9905	60.0052	100
2.8375	45.3809	14.2832	60.0285	60.0128	100.001
2.84583	45.464	14.2834	59.9936	59.9445	100.002
2.85417	45.543	14.2834	60.0076	60.0642	100.003
2.8625	45.6237	14.2834	59.9556	59.9505	100.003
2.87083	45.705	14.2834	60.0055	60.0504	100.002
2.87917	45.7871	14.2833	59.9961	59.9618	100.002
2.8875	45.8679	14.2832	60.004	59.9893	100.001
2.89583	45.9488	14.2832	60.0463	60.0376	100.001
2.90417	46.0305	14.2831	59.9645	60.0111	100.001
2.9125	46.1099	14.2831	60.0094	59.9823	100.001
2.92083	46.1912	14.2832	59.9885	59.9958	100.001
2.92917	46.2724	14.2832	60.0239	60.0035	100.001
2.9375	46.3519	14.2832	59.9921	60.0065	100.001
2.94583	46.433	14.2831	60.0016	59.9817	100.001
2.95417	46.5126	14.283	59.9886	59.9895	100
2.9625	46.594	14.2831	59.976	60.0277	100.001
2.97083	46.6789	14.2833	60.0321	59.9679	100.002
2.97917	46.7581	14.2833	59.9915	59.9941	100.002
2.9875	46.84	14.2833	59.9888	60.0233	100.002
2.99583	46.921	14.2833	59.9883	59.9976	100.002
3.00417	47.0001	14.2835	60.0247	59.9981	100.003
3.0125	47.0809	14.2836	60.0099	59.9905	100.004
3.02083	47.1632	14.2835	59.988	60.0051	100.004
3.02917	47.2442	14.2835	60.011	60.0092	100.003
3.0375	47.3271	14.2834	60.0003	60.0098	100.003
3.04583	47.4066	14.2833	60.0037	59.999	100.002
3.05417	47.4866	14.2833	60.0015	59.976	100.002
3.0625	47.5687	14.2833	59.9818	60.0042	100.002
3.07083	47.6505	14.2832	59.9899	59.9848	100.001
3.07917	47.73	14.2832	59.9965	60.0095	100.001
3.0875	47.8114	14.2832	59.9981	59.9841	100.001
3.09583	47.8935	14.2831	59.9912	59.999	100.001
3.10417	47.9781	14.2832	60.0262	60.0081	100.001
3.1125	48.0588	14.2833	59.9844	59.9804	100.002
3.12083	48.1402	14.2833	60.0406	60.0391	100.002
3.12917	48.2205	14.2833	59.9684	59.9985	100.002
3.1375	48.3023	14.2833	59.9803	59.9765	100.002
3.14583	48.3856	14.2834	60.0081	60.0377	100.003
3.15417	48.465	14.2836	60.0189	59.9633	100.004
3.1625	48.547	14.2837	60.0211	59.9935	100.005
3.17083	48.6302	14.2839	59.9487	60.0255	100.007
3.17917	48.7116	14.2841	60.0061	59.994	100.007
3.1875	48.7946	14.2842	60.0125	60.003	100.008
3.19583	48.8743	14.2842	59.9995	60.0191	100.008
3.20417	48.9581	14.2841	60.0105	59.983	100.007
3.2125	49.038	14.2838	59.9935	59.9905	100.006
3.22083	49.1214	14.2836	60.0062	60.0087	100.004
3.22917	49.1996	14.2834	59.9651	59.9899	100.003
3.2375	49.2836	14.2831	60.0336	60.0376	100.001
3.24583	49.3642	14.2829	59.9924	59.9944	99.9992
3.25417	49.4463	14.2828	59.9916	59.9646	99.9985
3.2625	49.5279	14.2828	59.9765	60.026	99.9988
3.27083	49.6089	14.2831	60.0567	59.9999	100.001
3.27917	49.69	14.2835	59.9808	60.0005	100.003
3.2875	49.7745	14.2838	60.0058	59.9973	100.005
3.29583	49.8564	14.284	59.9783	60.0031	100.007
3.30417	49.9388	14.2839	60.0208	59.9951	100.006
3.3125	50.0226	14.2837	59.9802	59.9877	100.005
3.32083	50.1019	14.2835	60.0277	60.0127	100.003
3.32917	50.1818	14.2834	59.9986	60.0086	100.002
3.3375	50.2658	14.2833	60.0104	60.007	100.002
3.34583	50.3469	14.2833	59.995	59.9917	100.002
3.35417	50.4283	14.2833	60.0062	59.9749	100.002
3.3625	50.5094	14.2832	59.9856	59.9974	100.002
3.37083	50.5926	14.2832	59.9895	60.0293	100.001
3.37917	50.675	14.2832	60.0371	59.9991	100.001
3.3875	50.7572	14.2831	59.9738	60.0004	100.001
3.39583	50.8381	14.283	59.9582	59.9955	99.9999
3.40417	50.9226	14.2829	60.0507	59.9972	99.9992
3.4125	51.0021	14.2829	59.962	59.9855	99.9991
3.42083	51.0839	14.2829	60.0248	60.0257	99.9994
3.42917	51.1675	14.2829	59.9885	59.9742	99.9994
3.4375	51.2473	14.283	60.0462	60.0462	100
3.44583	51.3298	14.2832	59.9668	59.9464	100.001
3.45417	51.4122	14.2832	59.9985	59.9961	100.001
3.4625	51.4954	14.2832	59.9981	60.0374	100.001
3.47083	51.5758	14.2831	59.9913	60.0057	100.001
3.47917	51.657	14.2832	60.018	59.9772	100.001
3.4875	51.7411	14.2831	60.0006	59.9952	100.001
3.49583	51.8211	14.2831	59.9567	59.9981	100.001
3.50417	51.9032	14.2831	60.0433	60.0081	100.001
3.5125	51.9861	14.2831	60.0457	60.0043	100.001
3.52083	52.0688	14.2831	59.9489	60.0001	100.001
3.52917	52.1515	14.2831	59.9916	59.9739	100.001
3.5375	52.2322	14.2832	59.9802	60.0394	100.001
3.54583	52.3124	14.2833	60.0523	59.9751	100.002
3.55417	52.3957	14.2834	59.9866	60.0295	100.003
3.5625	52.4801	14.2835	59.9796	59.9906	100.003
3.57083	52.5609	14.2835	60.0121	60.02	100.004
3.57917	52.6429	14.2836	59.9858	59.9677	100.004
3.5875	52.726	14.2836	59.9886	59.9818	100.004
3.59583	52.806	14.2835	60.0088	60.0004	100.004
3.60417	52.8913	14.2833	60.0359	60.0122	100.002
3.6125	52.9716	14.2831	59.9519	60.0158	100.001
3.62083	53.0528	14.283	60.0076	59.9752	99.9999
3.62917	53.1382	14.2829	60.0185	60.0408	99.9996
3.6375	53.2208	14.2831	60.0211	59.9873	100
3.64583	53.2996	14.2832	59.9765	59.9924	100.001
3.65417	53.3846	14.2832	60.0075	60.0029	100.001
3.6625	53.466	14.2832	60.0039	60.0132	100.001
3.67083	53.549	14.2832	59.9714	59.981	100.001
3.67917	53.6321	14.2832	60.006	59.9976	100.002
3.6875	53.712	14.2832	60.0349	60.018	100.001
3.69583	53.7997	14.2832	59.9993	59.9988	100.001
3.70417	53.879	14.2832	59.9863	59.9968	100.001
3.7125	53.9605	14.2831	59.9946	59.9873	100.001
3.72083	54.0439	14.2831	60.0094	60.0217	100
3.72917	54.128	14.2831	59.9639	59.9849	100
3.7375	54.2094	14.2831	60.0181	59.972	100.001
3.74583	54.2925	14.2832	60.0193	60.0104	100.001
3.75417	54.3753	14.2832	60.0102	60.0166	100.001
3.7625	54.4582	14.2831	59.9834	59.9789	100.001
3.77083	54.5392	14.283	59.9612	60.0061	100
3.77917	54.6223	14.2829	60.0503	60.016	99.9992
3.7875	54.7034	14.2827	59.9733	59.9919	99.998
3.79583	54.7884	14.2826	60.0297	60.0124	99.9971
3.80417	54.8699	14.2825	60.0023	60.0058	99.9968
3.8125	54.9532	14.2826	59.9983	59.9758	99.9971
3.82083	55.0343	14.2827	59.9881	60.0074	99.998
3.82917	55.1168	14.2829	60.0052	60.0147	99.9993
3.8375	55.1974	14.283	60.0079	60.0095	100
3.84583	55.2812	14.2831	59.9533	59.9556	100
3.85417	55.3651	14.2831	60.0191	60.0216	100
3.8625	55.4489	14.283	59.9919	59.9962	100
3.87083	55.5299	14.2829	60.0116	60.0152	99.9994
3.87917	55.6146	14.2829	60.0205	59.987	99.999
3.8875	55.6953	14.2829	59.9952	60.0236	99.9992
3.89583	55.7796	14.2829	60.0145	59.989	99.9994
3.90417	55.8616	14.283	59.9726	59.9766	99.9998
3.9125	55.9451	14.283	59.9918	60.0133	99.9997
3.92083	56.0256	14.2829	59.9929	59.9918	99.9996
3.92917	56.1097	14.2829	60.0121	60.0061	99.9992
3.9375	56.1904	14.283	59.9995	60.0088	100
3.94583	56.2749	14.2832	59.9954	59.9836	100.001
3.95417	56.3581	14.2832	59.998	60.004	100.002
3.9625	56.4386	14.2834	60.0054	60.0065	100.002
3.97083	56.5218	14.2833	59.9692	59.9961	100.002
3.97917	56.6059	14.2833	60.0337	59.994	100.002
3.9875	56.6867	14.2833	60.0189	60.0098	100.002
3.99583	56.7743	14.2834	59.9673	60.0107	100.003
4.00417	56.8537	14.2833	59.9994	59.9895	100.002
4.0125	56.9375	14.2831	60.0068	60.0074	100.001
4.02083	57.0203	14.283	60.002	60.0048	100
4.02917	57.1026	14.283	60.0119	59.9622	99.9997
4.0375	57.185	14.2829	59.9894	60.0209	99.999
4.04583	57.2676	14.2828	59.9883	59.9853	99.9983
4.05417	57.348	14.2826	60.0352	60.0077	99.9975
4.0625	57.4338	14.2825	59.9623	60.0034	99.9965
4.07083	57.514	14.2824	60.0143	59.9735	99.9956
4.07917	57.5972	14.2823	59.9795	60.0317	99.995
4.0875	57.6806	14.2822	60.0007	59.9978	99.9943
4.09583	57.7625	14.2822	60.0621	59.9954	99.9942
4.10417	57.8473	14.2822	59.9517	59.9935	99.9944
4.1125	57.9277	14.2823	60.0332	59.9827	99.9951
4.12083	58.0113	14.2823	59.9723	60.0433	99.9954
4.12917	58.0944	14.2824	59.9768	59.9991	99.9955
4.1375	58.1769	14.2824	60.0048	59.9819	99.9958
4.14583	58.2574	14.2824	60.0102	59.9877	99.9958
4.15417	58.3405	14.2824	60.0026	60.019	99.9957
4.1625	58.4223	14.2823	60.0467	60.0138	99.9952
4.17083	58.5089	14.2823	59.9818	59.9892	99.995
4.17917	58.5891	14.2822	59.9949	60.0038	99.9945
4.1875	58.6715	14.2821	59.998	59.9766	99.9939
4.19583	58.7569	14.2821	59.9762	60.0043	99.9934
4.20417	58.8378	14.282	59.9911	60.0232	99.9929
4.2125	58.9218	14.2819	59.9943	59.9646	99.9926
4.22083	59.0044	14.2818	60.0039	60.0134	99.9917
4.22917	59.0872	14.2818	60.0481	59.9946	99.9913
4.2375	59.1704	14.2817	59.9545	60.0278	99.991
4.24583	59.248	14.2817	60.0059	59.9715	99.991
4.25417	59.3328	14.2817	59.9774	59.9811	99.9908
4.2625	59.4156	14.2816	60.0153	60.041	99.9903
4.27083	59.4978	14.2815	59.9873	59.9832	99.9897
4.27917	59.5815	14.2815	60.0283	60.0063	99.9895
4.2875	59.6652	14.2815	60.0004	59.9794	99.9897
4.29583	59.7472	14.2815	60.0032	60.0174	99.9894
4.30417	59.8311	14.2814	59.986	59.9983	99.9889
4.3125	59.9136	14.2814	60.0119	59.981	99.9886
4.32083	59.9952	14.2814	59.9894	60.0152	99.9889
4.32917	60.0792	14.2815	59.9897	59.9973	99.9896
4.3375	60.1605	14.2815	60.0052	60.0198	99.9897
4.34583	60.2458	14.2815	60.0184	59.9826	99.9897
4.35417	60.3256	14.2815	59.9851	59.9904	99.9894
4.3625	60.4107	14.2814	59.9845	60.0295	99.9889
4.37083	60.4927	14.2814	60.0415	59.995	99.9887
4.37917	60.5762	14.2814	59.9885	60.0003	99.9886
4.3875	60.6578	14.2813	60.0238	59.9865	99.9884
4.39583	60.7429	14.2813	59.9894	60.0114	99.9879
4.40417	60.8245	14.2812	59.9659	59.9891	99.9874
4.4125	60.9065	14.2811	60.0372	60.0064	99.9868
4.42083	60.9894	14.2811	59.9879	60.021	99.9863
4.42917	61.0733	14.281	60.0211	60.0079	99.9857
4.4375	61.1551	14.2809	59.9783	59.9867	99.9854
4.44583	61.2398	14.2809	59.9834	59.9905	99.9851
4.45417	61.3228	14.2808	60.0104	60.0051	99.9849
4.4625	61.4041	14.2808	60.0323	59.9997	99.9849
4.47083	61.4885	14.2809	59.9955	59.9973	99.9854
4.47917	61.5715	14.2809	59.998	60.0099	99.9853
4.4875	61.6528	14.281	60.0228	59.957	99.9857
4.49583	61.7369	14.281	59.9378	60.0402	99.9859
4.50417	61.8195	14.281	60.0131	59.9868	99.9857
4.5125	61.9048	14.281	59.9958	60.0077	99.9856
4.52083	61.9849	14.281	60.0058	59.9835	99.9856
4.52917	62.069	14.2809	60.013	60.0131	99.9854
4.5375	62.1521	14.2808	59.9977	59.9999	99.9845
4.54583	62.2357	14.2807	59.9803	59.991	99.9836
4.55417	62.3179	14.2807	60.0217	60.0142	99.9836
4.5625	62.4019	14.2806	59.9624	59.9932	99.9833
4.57083	62.4857	14.2805	60.0367	60.0201	99.9828
4.57917	62.5678	14.2804	60.0162	59.9952	99.9819
4.5875	62.65	14.2802	59.9905	59.9935	99.9805
4.59583	62.7316	14.28	60.0129	59.9993	99.9791
4.60417	62.8132	14.2798	59.968	59.9982	99.9776
4.6125	62.8956	14.2795	60.0291	59.9896	99.9758
4.62083	62.9793	14.2794	59.9804	60.0146	99.9746
4.62917	63.0615	14.2793	59.9661	59.9878	99.9743
4.6375	63.1433	14.2793	60.0459	59.9897	99.9739
4.64583	63.2261	14.2791	59.9704	60.0087	99.973
4.65417	63.3102	14.2792	59.9995	59.9976	99.9731
4.6625	63.3925	14.2794	60.0214	59.9913	99.9744
4.67083	63.4752	14.2795	59.9669	60.0047	99.9758
4.67917	63.5585	14.2797	59.9949	59.9853	99.9768
4.6875	63.6418	14.2798	60.0656	60.0352	99.9777
4.69583	63.7258	14.2799	59.9523	60.0061	99.9786
4.70417	63.8093	14.2801	60.0336	59.9578	99.9796
4.7125	63.8911	14.2801	59.9933	60.0136	99.9797
4.72083	63.9734	14.2802	59.987	59.9927	99.9804
4.72917	64.0579	14.2802	60.0078	60.026	99.9805
4.7375	64.1398	14.28	59.9633	59.9927	99.9792
4.74583	64.2213	14.2797	60.0149	59.9975	99.9772
4.75417	64.3066	14.2794	60.0137	60.0194	99.9745
4.7625	64.3869	14.279	60.0201	59.9988	99.9719
4.77083	64.4743	14.2787	59.9632	60.0085	99.9699
4.77917	64.5551	14.2785	60.0134	59.9795	99.9685
4.7875	64.6385	14.2784	59.974	60.0097	99.9675
4.79583	64.7213	14.2783	60.011	59.9777	99.9674
4.80417	64.8037	14.2783	60.004	60.0106	99.9674
4.8125	64.8855	14.2783	60.0061	59.994	99.9672
4.82083	64.9669	14.2781	59.987	60.0115	99.9656
4.82917	65.0519	14.2778	60.0151	59.9927	99.9639
4.8375	65.1348	14.2779	59.9859	60.0124	99.964
4.84583	65.2207	14.2779	60.0361	59.9954	99.9645
4.85417	65.3026	14.278	59.9697	60.0026	99.9647
4.8625	65.3859	14.278	60.005	59.996	99.9647
4.87083	65.4669	14.2781	60.0175	59.9999	99.9655
4.87917	65.5489	14.2781	60.0019	59.9765	99.9657
4.8875	65.6353	14.278	60.0001	60.0074	99.9651
4.89583	65.7165	14.2781	59.9708	60.0088	99.9653
4.90417	65.7988	14.2781	60.0032	60.0292	99.9654
4.9125	65.8843	14.2782	60.0188	59.9666	99.9661
4.92083	65.9684	14.2782	60.0152	59.9873	99.9665
4.92917	66.0488	14.2781	59.9704	60.0393	99.9656
4.9375	66.1315	14.2779	60.0187	59.9832	99.9642
4.94583	66.2176	14.2777	60.017	60.0135	99.9626
4.95417	66.3004	14.2775	59.9841	59.9873	99.9615
4.9625	66.3844	14.2774	59.9954	60.0222	99.9606
4.97083	66.4676	14.2773	59.9748	59.9668	99.9598
4.97917	66.5502	14.277	60.0285	60.0049	99.9579
4.9875	66.6322	14.2766	60.0105	60.0011	99.9553
4.99583	66.7144	14.2763	59.9611	59.9829	99.9531
5.00417	66.797	14.2761	60.0221	60.0089	99.9516
5.0125	66.8807	14.276	59.9911	59.9741	99.9507
5.02083	66.9664	14.276	59.9974	60.0299	99.9508
5.02917	67.0503	14.2761	60.0136	59.9833	99.9518
5.0375	67.1327	14.2762	60.0077	60.0126	99.9523
5.04583	67.2158	14.2762	59.9902	60.0148	99.9522
5.05417	67.2992	14.2761	59.9969	60.0203	99.9516
5.0625	67.3812	14.2761	60.025	59.9943	99.9514
5.07083	67.4651	14.2761	59.9438	59.9935	99.9519
5.07917	67.5479	14.2761	60.0443	59.9791	99.9514
5.0875	67.6326	14.2761	59.9681	59.998	99.9517
5.09583	67.7153	14.2761	60.0282	60.0226	99.9516
5.10417	67.8005	14.2758	59.9607	59.9957	99.9499
5.1125	67.8818	14.2756	60.0179	59.9692	99.9481
5.12083	67.9667	14.2756	59.9896	60.0063	99.9484
5.12917	68.0514	14.2758	60.0425	60.0042	99.9495
5.1375	68.1336	14.2759	59.9739	60.0096	99.9505
5.14583	68.2167	14.2761	60.0316	60.0148	99.9519
5.15417	68.3019	14.276	59.9622	59.9698	99.951
5.1625	68.3844	14.2758	60.0148	60.0158	99.9499
5.17083	68.4685	14.2757	60.021	59.9978	99.9489
5.17917	68.5529	14.2755	59.9523	59.9882	99.9478
5.1875	68.6335	14.2751	60.0341	60.0416	99.9448
5.19583	68.7174	14.2748	60.0084	59.9652	99.9427
5.20417	68.8014	14.2748	59.9966	60.007	99.9427
5.2125	68.8854	14.2748	60.0031	59.9826	99.9427
5.22083	68.9682	14.2746	59.9732	60.0216	99.9413
5.22917	69.0498	14.2743	60.001	59.9962	99.9391
5.2375	69.136	14.2741	60.0137	59.9751	99.9376
5.24583	69.2168	14.2739	59.9909	60.0358	99.9364
5.25417	69.3007	14.2741	60.0253	59.9691	99.9379
5.2625	69.3832	14.2744	60.0053	60.0248	99.9399
5.27083	69.4676	14.2744	59.9577	59.9687	99.9396
5.27917	69.5513	14.2742	60.0083	60.0483	99.9382
5.2875	69.6349	14.274	59.9966	59.9712	99.9369
5.29583	69.7184	14.2739	59.9921	59.9978	99.9366
5.30417	69.8016	14.2739	60.0385	59.995	99.9366
5.3125	69.8837	14.2737	59.9606	60.0215	99.9349
5.32083	69.9677	14.2734	59.9938	59.988	99.9328
5.32917	70.0514	14.2732	60.0167	59.9875	99.9314
5.3375	70.1361	14.273	60.0051	60.0303	99.9301
5.34583	70.2196	14.2728	59.9851	60.0037	99.9283
5.35417	70.3016	14.2726	59.9818	59.9789	99.9273
5.3625	70.3838	14.2725	60.0254	60.0034	99.9267
5.37083	70.4681	14.2725	60.0177	59.9951	99.9262
5.37917	70.5516	14.2724	59.9933	59.985	99.9259
5.3875	70.6346	14.2724	60.0025	60.0266	99.9259
5.39583	70.7186	14.2724	60.0042	59.9986	99.9256
5.40417	70.8023	14.2721	59.9842	59.9774	99.9238
5.4125	70.8866	14.2718	59.9776	60.0485	99.9218
5.42083	70.9683	14.2716	60.0568	59.9694	99.92
5.42917	71.0522	14.2714	59.9785	60.0135	99.9186
5.4375	71.1356	14.2712	60.0025	59.9675	99.9174
5.44583	71.219	14.2709	60.0014	59.9976	99.9154
5.45417	71.3014	14.2707	59.9545	60.023	99.914
5.4625	71.3857	14.2706	60.0241	59.9836	99.9131
5.47083	71.4691	14.2704	60.0012	60.0194	99.9116
5.47917	71.5521	14.2702	60.0128	60.0065	99.9102
5.4875	71.638	14.2699	59.9726	59.9988	99.9086
5.49583	71.7188	14.2696	60.0097	59.9693	99.9065
5.50417	71.8017	14.2693	59.998	60.0198	99.9039
5.5125	71.8865	14.2693	60.0036	60.0246	99.9038
5.52083	71.9682	14.2693	60.0252	59.98	99.904
5.52917	72.0525	14.2692	59.9889	59.9917	99.9034
5.5375	72.1373	14.2691	60.0015	60.0083	99.9029
5.54583	72.2192	14.269	59.975	59.9994	99.9021
5.55417	72.3023	14.2689	60.0416	59.9851	99.9016
5.5625	72.3857	14.269	59.9493	60.0293	99.9021
5.57083	72.4682	14.269	60.039	59.9801	99.9021
5.57917	72.5504	14.2687	60.0286	60.0202	99.9002
5.5875	72.636	14.2685	59.9671	59.9785	99.8987
5.59583	72.7192	14.2685	59.9949	60.0124	99.8985
5.60417	72.8055	14.2684	59.9916	59.9918	99.8976
5.6125	72.8868	14.2683	60.0399	59.9967	99.897
5.62083	72.971	14.2681	59.9493	60.0053	99.8953
5.62917	73.0547	14.2678	60.0308	59.9988	99.8933
5.6375	73.1377	14.2676	59.9868	60.0248	99.8919
5.64583	73.222	14.2675	59.9745	59.9592	99.8914
5.65417	73.3057	14.2675	60.0453	59.9956	99.8912
5.6625	73.3891	14.2674	59.9978	60.012	99.8908
5.67083	73.4733	14.2673	59.9703	59.9882	99.8898
5.67917	73.5548	14.2671	60.0351	59.9978	99.8885
5.6875	73.6381	14.267	59.9833	60.0442	99.888
5.69583	73.7228	14.267	59.9867	59.9612	99.8878
5.70417	73.8063	14.2669	59.9991	60.0087	99.8871
5.7125	73.8889	14.2667	60.0023	60.0016	99.8859
5.72083	73.9721	14.2666	59.9932	59.9982	99.8848
5.72917	74.056	14.2664	60.0071	60.0478	99.8838
5.7375	74.1392	14.2663	60.0011	59.9956	99.8834
5.74583	74.2237	14.2663	60.0265	59.9723	99.8831
5.75417	74.308	14.2663	59.9698	59.9865	99.883
5.7625	74.3931	14.2663	60.0324	60.0258	99.883
5.77083	74.4736	14.2663	59.9901	59.9755	99.8831
5.77917	74.5595	14.2663	59.9801	60.0006	99.8831
5.7875	74.6427	14.2663	60.0259	59.9856	99.8828
5.79583	74.7241	14.2661	59.962	60.0181	99.8814
5.80417	74.8088	14.2659	60.0568	59.9875	99.8803
5.8125	74.8921	14.2659	59.9575	60.0145	99.8803
5.82083	74.9758	14.266	60.0508	60.0176	99.8813
5.82917	75.06	14.266	59.9436	60.0164	99.8809
5.8375	75.1418	14.2659	60.0074	59.9757	99.8802
5.84583	75.2251	14.2659	60.039	59.9744	99.8801
5.85417	75.3088	14.2659	59.9725	60.0358	99.8801
5.8625	75.3938	14.266	60.0069	60.0007	99.881
5.87083	75.4758	14.2661	60.0025	59.9982	99.882
5.87917	75.5597	14.2662	59.9951	59.9986	99.8825
5.8875	75.6447	14.2663	60.0021	59.9792	99.8832
5.89583	75.7282	14.2663	59.9873	60.0138	99.8833
5.90417	75.809	14.2662	59.9877	59.9819	99.8824
5.9125	75.8944	14.2661	59.9996	60.0361	99.8815
5.92083	75.9772	14.266	60.0242	60.0102	99.881
5.92917	76.0625	14.266	59.9479	59.9732	99.8808
5.9375	76.1449	14.2659	60.0462	60.0159	99.8804
5.94583	76.2274	14.2657	59.9978	59.9729	99.8792
5.95417	76.3118	14.2656	60.0118	59.9937	99.878
5.9625	76.3957	14.2654	59.9853	60.0138	99.877
5.97083	76.4783	14.2653	60.0064	60.0108	99.8761
5.97917	76.5624	14.2652	59.9893	60.0085	99.8755
5.9875	76.6459	14.2652	59.9705	59.9962	99.8757
5.99583	76.7292	14.2654	60.0219	59.9615	99.8766
6.00417	76.8164	14.2655	60.0258	60.0848	99.8775
6.0125	76.8963	14.2655	59.9949	59.938	99.8773
6.02083	76.9787	14.2655	60.0113	59.9958	99.8775
6.02917	77.0646	14.2655	59.9661	59.9832	99.8775
6.0375	77.1488	14.2654	60.0679	59.9923	99.8769
6.04583	77.23	14.2653	59.9642	60.0241	99.8761
6.05417	77.3154	14.2652	60.0144	59.9877	99.8757
6.0625	77.3998	14.2652	59.9854	59.9838	99.8755
6.07083	77.4839	14.2652	59.9772	59.9819	99.8754
6.07917	77.5649	14.2652	60.0084	60.031	99.8757
6.0875	77.6483	14.2652	60.0089	60.0014	99.8757
6.09583	77.7327	14.2652	59.9652	60.0154	99.8751
6.10417	77.816	14.2651	60.0468	60.0091	99.8743
6.1125	77.8993	14.2649	59.9896	60.0102	99.8736
6.12083	77.9823	14.2649	60.0088	59.9552	99.8733
6.12917	78.0661	14.265	60.0117	60.0158	99.8739
6.1375	78.1511	14.265	59.9753	60.0159	99.8739
6.14583	78.2323	14.265	60.0106	59.9612	99.874
6.15417	78.3182	14.265	59.9843	59.9988	99.8739
6.1625	78.403	14.2649	59.9922	60.0054	99.8735
6.17083	78.4847	14.2649	60.0139	60.0142	99.8733
6.17917	78.5653	14.265	59.9681	60.0185	99.8739
6.1875	78.6492	14.2652	60.0506	59.9735	99.8751
6.19583	78.7337	14.2652	59.9788	60.0091	99.8753
6.20417	78.8146	14.2652	60.019	59.9849	99.8755
6.2125	78.8985	14.2653	59.9673	59.9995	99.8758
6.22083	78.9805	14.2653	60.0863	60.0357	99.8761
6.22917	79.0645	14.2653	59.9428	59.9632	99.8761
6.2375	79.1475	14.2653	59.9676	60.002	99.8761
6.24583	79.2332	14.2654	59.9931	60.0204	99.8768
6.25417	79.3151	14.2655	59.9888	60.0101	99.8776
6.2625	79.3997	14.2655	60.0088	59.9909	99.8773
6.27083	79.4821	14.2654	60.0949	59.9753	99.8771
6.27917	79.5681	14.2653	59.9361	60.0123	99.8764
6.2875	79.6507	14.2653	59.9898	59.9801	99.8761
6.29583	79.7321	14.2652	59.9942	59.9998	99.8751
6.30417	79.8172	14.2651	59.9893	60.0022	99.8746
6.3125	79.9012	14.2651	59.9933	60.0285	99.8747
6.32083	79.9828	14.2651	60.0523	60.0113	99.8744
6.32917	80.068	14.265	59.9889	59.981	99.8739
6.3375	80.1496	14.2648	59.9965	60.0125	99.8729
6.34583	80.2356	14.2648	59.9972	59.9701	99.8724
6.35417	80.3209	14.2648	59.9807	60.0099	99.8724
6.3625	80.4031	14.2648	60.0264	59.994	99.8726
6.37083	80.4874	14.2648	59.9675	60.0278	99.8727
6.37917	80.5684	14.2648	60.0072	59.9982	99.8729
6.3875	80.6534	14.2649	60.0194	59.972	99.8731
6.39583	80.7362	14.265	59.9714	60.0303	99.8738
6.40417	80.82	14.265	60.0306	59.9694	99.8741
6.4125	80.9023	14.265	59.9768	60.0189	99.8742
6.42083	80.9858	14.2651	60.0143	60.0164	99.8746
6.42917	81.0687	14.2651	59.9964	59.9658	99.8745
6.4375	81.1521	14.265	60.0164	59.9895	99.8743
6.44583	81.2355	14.265	59.9604	60.0051	99.874
6.45417	81.3197	14.265	60.0147	60.0191	99.8736
6.4625	81.4028	14.2648	60.026	59.997	99.8729
6.47083	81.4865	14.2647	59.9808	60.0108	99.8717
6.47917	81.57	14.2646	60.0099	60.0067	99.8711
6.4875	81.6519	14.2646	59.988	59.9916	99.8712
6.49583	81.7368	14.2647	59.9951	60.0151	99.8718
6.50417	81.8202	14.2648	60.0062	59.9666	99.8725
6.5125	81.9022	14.265	60.018	60.0102	99.8736
6.52083	81.9822	14.2652	59.9654	60.0012	99.8752
6.52917	82.0676	14.2654	60.0172	60	99.8771
6.5375	82.1528	14.2658	60.0307	59.9932	99.8792
6.54583	82.234	14.2659	59.9731	59.9948	99.8803
6.55417	82.3187	14.2658	59.9868	60.0134	99.8792
6.5625	82.399	14.2655	60.0128	59.9941	99.8773
6.57083	82.4848	14.2652	60.0722	59.9944	99.8755
6.57917	82.5693	14.265	59.9177	59.9945	99.8741
6.5875	82.6505	14.2648	60.0093	60.0084	99.8729
6.59583	82.7356	14.2646	60.0122	60.036	99.8712
6.60417	82.817	14.2644	59.9826	59.9695	99.8701
6.6125	82.9004	14.2644	60.0227	60.0284	99.8696
6.62083	82.9843	14.2644	59.9747	59.9851	99.8696
6.62917	83.0645	14.2643	60.0298	60.0023	99.8691
6.6375	83.148	14.2643	60.0037	59.9933	99.8689
6.64583	83.2327	14.2642	59.9851	59.9998	99.8684
6.65417	83.3142	14.264	59.9699	60.0117	99.8673
6.6625	83.3962	14.2639	60.0228	59.9945	99.8666
6.67083	83.4806	14.2639	60.0012	59.9678	99.866
6.67917	83.563	14.2639	60.0023	59.9954	99.866
6.6875	83.6456	14.2639	60.022	60.0463	99.8666
6.69583	83.7276	14.264	59.966	59.9906	99.867
6.70417	83.8133	14.264	60.0396	59.9817	99.8673
6.7125	83.8956	14.2641	59.9679	59.9959	99.8677
6.72083	83.9779	14.2642	59.9812	60.0098	99.8686
6.72917	84.0632	14.2643	60.0391	59.9904	99.8694
6.7375	84.1455	14.2644	59.9866	60.0178	99.8698
6.74583	84.2286	14.2644	60.0165	59.9802	99.8699
6.75417	84.3136	14.2644	60.0174	59.9976	99.8701
6.7625	84.3958	14.2644	59.9339	59.9932	99.8697
6.77083	84.479	14.2644	60.0203	60.0179	99.8695
6.77917	84.5628	14.2644	59.992	59.9871	99.8701
6.7875	84.6458	14.2646	59.9829	60.0172	99.8711
6.79583	84.7309	14.2647	60.0227	60.0019	99.8717
6.80417	84.8118	14.2648	59.9825	60.0168	99.8729
6.8125	84.8957	14.265	60.0259	59.9802	99.874
6.82083	84.9808	14.2651	60.0081	60.0053	99.875
6.82917	85.0643	14.2652	59.9683	60.0178	99.8751
6.8375	85.1467	14.265	60.0168	59.9802	99.874
6.84583	85.2303	14.2648	60.0092	59.9791	99.8724
6.85417	85.3126	14.2646	59.9789	60.0021	99.8712
6.8625	85.3958	14.2645	60.0254	60.0037	99.8703
6.87083	85.479	14.2644	59.9821	59.9929	99.8699
6.87917	85.5631	14.2645	59.9985	60.0232	99.8701
6.8875	85.6452	14.2645	60.0155	60.0034	99.8707
6.89583	85.7292	14.2646	60.0037	59.9771	99.871
6.90417	85.8113	14.2645	59.996	60.0047	99.8708
6.9125	85.8938	14.2645	60.0003	60.0002	99.8704
6.92083	85.9777	14.2644	59.9736	60.0054	99.8698
6.92917	86.0621	14.2643	60.0019	59.9961	99.8689
6.9375	86.146	14.2642	60.0229	60.0116	99.8683
6.94583	86.2307	14.264	60.0171	59.9832	99.8673
6.95417	86.3114	14.264	60.2545	60.0031	99.8668
6.9625	86.3939	14.2639	59.9723	59.996	99.8664
6.97083	86.4784	14.2638	60.0452	59.9936	99.8659
6.97917	86.5604	14.2639	59.9659	60.0192	99.8661
6.9875	86.6436	14.2639	60.0062	60.0015	99.8662
6.99583	86.7249	14.264	60.0171	59.9924	99.8667
7.00417	86.8088	14.264	59.9691	60.0183	99.8673
7.0125	86.8912	14.2642	60.0159	60.0033	99.8685
7.02083	86.977	14.2644	60.0165	59.9798	99.8694
7.02917	87.0576	14.2644	60.0032	60.0025	99.87
7.0375	87.1406	14.2645	59.9887	60.01	99.8701
7.04583	87.2264	14.2644	60.0266	60.0039	99.8698
7.05417	87.3107	14.2643	59.9593	59.9938	99.8693
7.0625	87.3924	14.2644	60.0005	59.9903	99.8694
7.07083	87.4757	14.2643	60.0055	60.034	99.8694
7.07917	87.5573	14.2644	60.0198	59.9749	99.8698
7.0875	87.6384	14.2645	59.9596	59.9997	99.8705
7.09583	87.7243	14.2646	60.0229	60.0027	99.8711
7.10417	87.8071	14.2646	59.9975	59.9834	99.8715
7.1125	87.8908	14.2647	59.9849	60.0067	99.8716
7.12083	87.9744	14.2646	59.9986	60.0034	99.871
7.12917	88.058	14.2644	60.0296	60.0087	99.8698
7.1375	88.1427	14.2643	60.0037	60.0012	99.8687
7.14583	88.2244	14.2641	59.9864	59.9919	99.8677
7.15417	88.3091	14.264	60.0014	59.9961	99.8673
7.1625	88.3928	14.264	60.0169	59.9751	99.8668
7.17083	88.4766	14.2639	59.9855	59.9938	99.8662
7.17917	88.5595	14.2639	59.9699	60.0151	99.8661
7.1875	88.6424	14.2638	60.0118	59.9797	99.8658
7.19583	88.7264	14.2637	60.0145	60.0337	99.8652
7.20417	88.8116	14.2637	60.0014	60.0236	99.8652
7.2125	88.8921	14.2637	59.9823	60.0007	99.8652
7.22083	88.9767	14.2638	60.0049	59.9662	99.8654
7.22917	89.0579	14.2637	59.9951	59.9958	99.8651
7.2375	89.1415	14.2638	59.9939	59.9881	99.8656
7.24583	89.2246	14.2641	59.9884	60.0321	99.8676
7.25417	89.3059	14.2644	60.0293	60.01	99.8696
7.2625	89.3936	14.2646	60.0155	59.9624	99.871
7.27083	89.4745	14.2645	60.0124	60.0313	99.8702
7.27917	89.557	14.2643	59.9917	59.9811	99.8689
7.2875	89.6407	14.2642	59.9811	60.0008	99.8684
7.29583	89.7232	14.2641	59.9857	60.0326	99.8676
7.30417	89.808	14.264	59.9868	59.9838	99.8671
7.3125	89.8903	14.264	60.0365	59.9684	99.8668
7.32083	89.9717	14.264	59.9975	60.0207	99.867
7.32917	90.0561	14.2642	59.9694	60.0391	99.868
7.3375	90.1383	14.2645	60.0332	59.947	99.8703
7.34583	90.2203	14.2647	60.0179	60.0317	99.8716
7.35417	90.306	14.2647	59.9723	59.9802	99.872
7.3625	90.3895	14.2647	60.0092	59.9904	99.8719
7.37083	90.4701	14.2648	59.9935	59.9893	99.8724
7.37917	90.5536	14.2647	60.0304	60.029	99.8722
7.3875	90.6361	14.2646	59.9818	59.9756	99.8709
7.39583	90.7202	14.2643	60.0195	60.0209	99.8691
7.40417	90.8058	14.2641	59.9837	59.9736	99.8678
7.4125	90.8872	14.264	59.9968	60.0141	99.867
7.42083	90.9693	14.2638	59.994	59.9937	99.8658
7.42917	91.0546	14.2636	59.9852	60.0192	99.8642
7.4375	91.1389	14.2635	60.0118	59.9853	99.8631
7.44583	91.2197	14.2633	60.0232	60.0167	99.8624
7.45417	91.304	14.2633	59.9615	59.9748	99.8622
7.4625	91.3895	14.2633	60.023	60.0303	99.8624
7.47083	91.471	14.2634	59.9943	59.9987	99.8626
7.47917	91.5548	14.2634	60.03	60.0203	99.8629
7.4875	91.6382	14.2634	59.9507	59.9704	99.8631
7.49583	91.7199	14.2634	60.0249	60.0095	99.8628
7.50417	91.8056	14.2635	59.9825	59.9759	99.8633
7.5125	91.8876	14.2636	60.0136	60.0444	99.864
7.52083	91.9709	14.2637	59.9794	60.0014	99.8649
7.52917	92.0547	14.2638	59.9939	59.9806	99.8658
7.5375	92.1388	14.2639	60.0208	59.9836	99.8662
7.54583	92.2208	14.264	60.0111	60.0135	99.8668
7.55417	92.306	14.2641	59.9835	59.9878	99.8674
7.5625	92.3882	14.2641	60.0205	60.0181	99.8678
7.57083	92.4732	14.2642	60.0244	60.0042	99.8681
7.57917	92.5568	14.2642	59.9574	60.0038	99.8686
7.5875	92.6395	14.2643	60.0055	59.9757	99.8691
7.59583	92.7216	14.2644	60.0038	59.9947	99.8695
7.60417	92.8055	14.2644	60.0147	60.0382	99.8696
7.6125	92.8882	14.2643	59.9886	59.9732	99.8691
7.62083	92.9731	14.2642	60.0138	60.0059	99.8682
7.62917	93.0544	14.264	59.9658	59.9984	99.8669
7.6375	93.1378	14.2637	60.0117	59.9864	99.8649
7.64583	93.221	14.2635	59.9954	60.0239	99.8631
7.65417	93.3043	14.2632	60.0459	59.9818	99.8614
7.6625	93.3871	14.263	59.964	60.018	99.8601
7.67083	93.4695	14.2629	59.9802	59.9897	99.8595
7.67917	93.5527	14.2629	59.9971	60.0132	99.859
7.6875	93.6356	14.263	60.0099	59.9733	99.8598
7.69583	93.7191	14.2633	60.0135	60.0249	99.8621
7.70417	93.8042	14.2638	60.0237	59.9881	99.8656
7.7125	93.8875	14.2641	59.9834	59.9992	99.868
7.72083	93.9703	14.2645	59.9821	59.9869	99.8701
7.72917	94.0534	14.2647	60.036	60.0068	99.8716
7.7375	94.1379	14.2647	59.9496	60.002	99.8719
7.74583	94.2209	14.2647	60.0309	60.0078	99.8718
7.75417	94.3041	14.2647	59.9927	59.9849	99.8719
7.7625	94.3879	14.2646	60.0075	60.0289	99.8713
7.77083	94.4726	14.2645	60.0075	60.0081	99.8703
7.77917	94.5539	14.2643	59.9893	59.9881	99.8694
7.7875	94.637	14.2642	60.0106	59.978	99.8685
7.79583	94.7218	14.2641	60.0136	59.9876	99.8678
7.80417	94.8039	14.264	59.9502	60.0448	99.8667
7.8125	94.8879	14.2638	60.0176	59.9996	99.8656
7.82083	94.9695	14.2637	60.0079	59.9779	99.8645
7.82917	95.0523	14.2636	60.0212	60.0278	99.864
7.8375	95.1388	14.2636	59.976	59.9589	99.8642
7.84583	95.2203	14.2636	59.9975	60.0028	99.864
7.85417	95.3031	14.2636	60.0054	60.0353	99.864
7.8625	95.3868	14.2636	59.992	59.97	99.8638
7.87083	95.4698	14.2635	60.0271	60.0027	99.8636
7.87917	95.5543	14.2635	59.9899	60.0195	99.8631
7.8875	95.6347	14.2634	59.9664	59.9731	99.863
7.89583	95.7173	14.2634	60.0026	60.0222	99.8628
7.90417	95.8022	14.2634	60.0339	59.9723	99.8628
7.9125	95.885	14.2634	59.9906	60.0326	99.8628
7.92083	95.9686	14.2634	59.9856	59.9559	99.8628
7.92917	96.0524	14.2635	59.9922	60.0559	99.8633
7.9375	96.1357	14.2636	60.0276	59.9652	99.8639
7.94583	96.2183	14.2635	59.9872	60.0166	99.8638
7.95417	96.3034	14.2635	59.9932	60.0064	99.8638
7.9625	96.3854	14.2636	59.9925	59.988	99.8639
7.97083	96.4685	14.2636	60.0125	60.0082	99.8642
7.97917	96.5532	14.2636	59.9899	60.0052	99.864
7.9875	96.6377	14.2636	59.9979	59.9564	99.8639
7.99583	96.7204	14.2635	60.0141	60.0086	99.8638
8.00417	96.8025	14.2636	59.9922	60.0346	99.8639
8.0125	96.8873	14.2636	59.9943	59.9573	99.8638
8.02083	96.9708	14.2636	59.9825	60.01	99.864
8.02917	97.0531	14.2635	60.0359	60.0495	99.8638
8.0375	97.137	14.2636	59.966	59.9862	99.8639
8.04583	97.2212	14.2635	59.9662	59.9571	99.8637
8.05417	97.304	14.2635	60.0436	59.9933	99.8635
8.0625	97.3884	14.2635	60.0311	60.0386	99.8636
8.07083	97.4714	14.2635	60.0065	59.9976	99.8636
8.07917	97.5547	14.2635	59.9715	60.0054	99.8633
8.0875	97.6369	14.2635	60.0375	59.9708	99.8635
8.09583	97.72	14.2636	59.9724	59.9703	99.864
8.10417	97.8049	14.2636	60.0037	60.023	99.8644
8.1125	97.8871	14.2637	60.012	60.0035	99.8647
8.12083	97.9702	14.2637	59.9744	60.034	99.8649
8.12917	98.0531	14.2637	60.0302	59.9731	99.8647
8.1375	98.1376	14.2637	60.0041	60.0023	99.8646
8.14583	98.2212	14.2636	59.9937	60.005	99.8644
8.15417	98.3038	14.2636	59.9884	60.0083	99.8643
8.1625	98.387	14.2637	60.0399	59.9854	99.8648
8.17083	98.4732	14.2638	59.9578	60.014	99.8653
8.17917	98.5544	14.2638	60.0187	59.99	99.8654
8.1875	98.6368	14.2638	59.9988	60.0146	99.8654
8.19583	98.7215	14.2637	59.9776	59.9878	99.8649
8.20417	98.8063	14.2636	60.0057	60.0172	99.8645
8.2125	98.8895	14.2636	59.9682	59.9771	99.8645
8.22083	98.9744	14.2636	60.0145	60.011	99.8639
8.22917	99.0574	14.2635	59.9991	60.0013	99.8631
8.2375	99.1409	14.2632	59.9854	60.0014	99.8617
8.24583	99.2207	14.2632	60.0402	59.9901	99.8613
8.25417	99.3061	14.2632	60.0085	60.0056	99.8611
8.2625	99.3906	14.2632	59.9515	60.0034	99.8614
8.27083	99.4729	14.2632	60.0605	59.9906	99.8617
8.27917	99.556	14.2633	59.9827	60.0169	99.8621
8.2875	99.6394	14.2633	59.9862	60.0069	99.8624
8.29583	99.7221	14.2634	60.0133	59.9844	99.8626
8.30417	99.806	14.2635	59.9844	60.0126	99.8636
8.3125	99.8877	14.2636	60.0059	59.9801	99.8642
8.32083	99.9718	14.2637	59.9847	60.0183	99.8645
8.32917	100.057	14.2637	60.0324	59.9757	99.8647
8.3375	100.14	14.2636	59.9809	60.0254	99.8643
8.34583	100.224	14.2636	60.0213	59.971	99.864
8.35417	100.306	14.2636	59.9902	60.0068	99.8639
8.3625	100.389	14.2635	59.9728	60.0066	99.8635
8.37083	100.472	14.2635	59.9832	59.9997	99.8631
8.37917	100.555	14.2634	60.0305	59.9977	99.863
8.3875	100.639	14.2635	60.0046	60.009	99.8631
8.39583	100.723	14.2634	59.9787	60.0111	99.8628
8.40417	100.805	14.2633	60.0158	59.9963	99.8622
8.4125	100.889	14.2633	60.0215	59.9818	99.8619
8.42083	100.971	14.2632	60.0166	60.003	99.8617
8.42917	101.055	14.2632	59.9827	59.9902	99.8614
8.4375	101.139	14.2632	59.9871	60.0318	99.8614
8.44583	101.221	14.2632	60.0032	59.9608	99.8614
8.45417	101.307	14.2632	59.9663	60.0006	99.8614
8.4625	101.388	14.2632	60.056	60.0163	99.8612
8.47083	101.472	14.2631	59.9648	60.0272	99.8608
8.47917	101.555	14.2631	60.03	59.9851	99.8609
8.4875	101.639	14.2631	59.9672	60.0018	99.861
8.49583	101.724	14.2632	60.0104	59.9928	99.8611
8.50417	101.808	14.2632	60.0072	60.0124	99.8613
8.5125	101.894	14.2633	59.9915	60.0139	99.8621
8.52083	101.975	14.2633	60.018	59.9792	99.8624
8.52917	102.058	14.2633	59.9769	60.0147	99.8619
8.5375	102.142	14.2632	59.9892	59.995	99.8617
8.54583	102.225	14.2632	60.0175	59.9773	99.8612
8.55417	102.31	14.2631	59.9791	60.0165	99.861
8.5625	102.392	14.2631	60.0445	60.0068	99.861
8.57083	102.474	14.2632	59.9421	59.9858	99.8612
8.57917	102.558	14.2631	60.0187	60.0158	99.8608
8.5875	102.639	14.2631	60.0125	60.0077	99.8605
8.59583	102.726	14.263	60.0287	59.9872	99.8602
8.60417	102.808	14.263	59.9384	59.9608	99.8599
8.6125	102.892	14.263	60.0245	60.0303	99.8598
8.62083	102.974	14.263	59.9743	60.0019	99.8601
8.62917	103.057	14.263	60.0402	60.0123	99.8601
8.6375	103.138	14.263	59.9698	59.9742	99.8598
8.64583	103.221	14.2629	60.0516	59.9979	99.8596
8.65417	103.307	14.2629	59.9633	60.0108	99.8593
8.6625	103.39	14.2629	59.9916	60.0162	99.8589
8.67083	103.474	14.2629	60.0002	59.9861	99.8591
8.67917	103.557	14.2629	59.9877	59.9914	99.859
8.6875	103.639	14.2628	60.0288	59.9848	99.8587
8.69583	103.723	14.2629	59.9594	60.0117	99.859
8.70417	103.808	14.2629	60.0631	60.0211	99.859
8.7125	103.889	14.2628	59.9768	59.9876	99.8589
8.72083	103.973	14.2628	59.9947	60.0019	99.8589
8.72917	104.056	14.2628	60.0254	60.0168	99.8582
8.7375	104.138	14.2627	59.9643	60.0059	99.8582
8.74583	104.223	14.2627	60.0413	59.9713	99.8579
8.75417	104.306	14.2628	59.9712	59.9995	99.8584
8.7625	104.389	14.2628	60.0237	59.995	99.8587
8.77083	104.473	14.2629	59.9579	59.999	99.859
8.77917	104.557	14.2629	60.0489	60.0085	99.8593
8.7875	104.638	14.2629	59.9623	59.9836	99.8595
8.79583	104.723	14.2629	59.9856	60.0166	99.8596
8.80417	104.806	14.263	60.0365	59.9992	99.8599
8.8125	104.889	14.263	59.9906	60.0171	99.86
8.82083	104.972	14.263	59.986	59.987	99.8596
8.82917	105.055	14.2629	60.0201	60.0014	99.8595
8.8375	105.138	14.2629	60.1966	60.0077	99.8593
8.84583	105.223	14.2629	60.0214	59.9885	99.859
8.85417	105.304	14.2628	59.9989	59.987	99.8586
8.8625	105.389	14.2628	59.9525	60.0357	99.8586
8.87083	105.472	14.2628	60.0386	60.002	99.8585
8.87917	105.557	14.2629	59.9966	59.9987	99.859
8.8875	105.641	14.2629	60.0095	59.9778	99.8593
8.89583	105.725	14.2629	59.9839	59.9862	99.8591
8.90417	105.807	14.2629	60.0045	60.0212	99.8592
8.9125	105.891	14.2629	59.9892	59.9831	99.8593
8.92083	105.972	14.2629	59.9759	60.0031	99.8589
8.92917	106.058	14.2629	60.0462	60.0037	99.8591
8.9375	106.141	14.2629	59.9914	59.9789	99.8594
8.94583	106.226	14.2629	60.0303	60.0138	99.8596
8.95417	106.308	14.263	59.9626	60.0284	99.8596
8.9625	106.392	14.2629	60.0381	59.9991	99.8595
8.97083	106.473	14.2629	59.9857	59.9946	99.8594
8.97917	106.556	14.263	59.9694	59.9669	99.8596
8.9875	106.641	14.263	60.015	60.036	99.8596
8.99583	106.723	14.263	60.0082	59.9944	99.8598
9.00417	106.808	14.2629	59.9642	60.0025	99.8594
9.0125	106.89	14.2628	60.0158	59.9829	99.8589
9.02083	106.972	14.2629	59.9996	59.981	99.859
9.02917	107.055	14.2629	60.0522	60.0468	99.8593
9.0375	107.141	14.263	59.9778	59.9703	99.8598
9.04583	107.225	14.263	59.9893	59.9986	99.8602
9.05417	107.307	14.2631	59.9901	60.0027	99.8604
9.0625	107.391	14.2631	59.9888	60.0096	99.8607
9.07083	107.475	14.2631	59.9928	59.9962	99.8607
9.07917	107.558	14.2631	60.0299	59.9859	99.861
9.0875	107.642	14.2632	59.9959	60.0127	99.8612
9.09583	107.725	14.2632	59.9871	59.9774	99.8613
9.10417	107.809	14.2632	59.9978	60.0323	99.8612
9.1125	107.893	14.2632	60.005	60.0055	99.8611
9.12083	107.976	14.2632	59.9951	59.9871	99.8611
9.12917	108.059	14.2631	59.9903	59.9969	99.8607
9.1375	108.143	14.2631	60.0184	60.0049	99.8604
9.14583	108.225	14.263	59.9924	60.002	99.8598
9.15417	108.309	14.263	60.0199	59.9901	99.8596
9.1625	108.393	14.2629	60.0125	60.0657	99.8593
9.17083	108.476	14.2629	59.968	59.95	99.8594
9.17917	108.56	14.2629	59.9995	60.0021	99.8593
9.1875	108.643	14.2628	59.9827	59.9707	99.8586
9.19583	108.727	14.2628	60.0095	60.0325	99.8583
9.20417	108.81	14.2627	60.0268	59.9518	99.8582
9.2125	108.893	14.2627	59.9767	60.0161	99.8579
9.22083	108.978	14.2627	60.0171	60.0068	99.8579
9.22917	109.059	14.2627	59.985	60.0083	99.8577
9.2375	109.143	14.2627	59.9895	59.9615	99.8576
9.24583	109.227	14.2627	60.0344	60.0304	99.8581
9.25417	109.311	14.2628	60.001	60.019	99.8587
9.2625	109.394	14.2629	59.9791	59.9898	99.8591
9.27083	109.477	14.2629	59.9998	60.0015	99.8594
9.27917	109.559	14.2629	59.9832	59.9874	99.8592
9.2875	109.642	14.2628	59.9954	60.0145	99.8588
9.29583	109.727	14.2627	60.0117	60.0212	99.8579
9.30417	109.808	14.2627	60.015	59.9488	99.8578
9.3125	109.893	14.2627	59.9685	60.025	99.8575
9.32083	109.978	14.2626	60.0456	59.9719	99.8572
9.32917	110.061	14.2627	59.9891	60.0375	99.8576
9.3375	110.146	14.2627	60.0042	59.984	99.8579
9.34583	110.226	14.2627	59.991	59.9882	99.8582
9.35417	110.311	14.2627	60.0029	60.0267	99.8582
9.3625	110.394	14.2628	59.9974	60.0081	99.8582
9.37083	110.477	14.2627	59.9935	59.9696	99.8582
9.37917	110.562	14.2627	59.9993	60.0076	99.8581
9.3875	110.643	14.2627	59.9913	60.0296	99.8578
9.39583	110.726	14.2627	60.0102	59.9815	99.858
9.40417	110.81	14.2627	60.0172	59.9877	99.8579
9.4125	110.894	14.2627	60.0014	60.0073	99.8577
9.42083	110.978	14.2626	60.0128	60.0124	99.8572
9.42917	111.059	14.2626	59.9389	59.981	99.857
9.4375	111.145	14.2626	60.0506	60.0066	99.8572
9.44583	111.228	14.2626	60.0149	59.9971	99.8575
9.45417	111.312	14.2627	59.9781	60.0148	99.8577
9.4625	111.393	14.2626	59.982	60.0018	99.8572
9.47083	111.479	14.2625	60.0049	60.0005	99.8567
9.47917	111.56	14.2625	60.0093	60.024	99.8565
9.4875	111.645	14.2624	60.004	59.9556	99.8561
9.49583	111.729	14.2625	60.0084	60.0135	99.8564
9.50417	111.812	14.2624	60.0126	59.9964	99.8559
9.5125	111.895	14.2625	59.9812	59.9755	99.8562
9.52083	111.98	14.2625	60.0204	60.0105	99.8563
9.52917	112.063	14.2624	59.9992	60.0243	99.8561
9.5375	112.146	14.2624	59.9644	59.975	99.8561
9.54583	112.228	14.2624	60.0185	60.0173	99.856
9.55417	112.313	14.2625	59.9723	59.9897	99.8563
9.5625	112.396	14.2624	60.0516	60.0065	99.856
9.57083	112.48	14.2624	59.9779	60.0115	99.8557
9.57917	112.564	14.2624	60.0003	60.0243	99.8558
9.5875	112.646	14.2624	59.9736	59.9791	99.8557
9.59583	112.73	14.2623	60.0165	60.0003	99.8548
9.60417	112.812	14.262	60.0065	59.9806	99.8533
9.6125	112.895	14.2619	60.0102	60.0062	99.8524
9.62083	112.98	14.262	59.9542	59.993	99.8526
9.62917	113.063	14.262	60.0168	60.007	99.8528
9.6375	113.145	14.262	60.0156	60.0066	99.853
9.64583	113.228	14.2621	59.9973	59.9975	99.8535
9.65417	113.311	14.2622	59.9862	59.9945	99.8542
9.6625	113.396	14.2623	60.0384	59.9953	99.8551
9.67083	113.478	14.2624	59.9629	60.0084	99.8558
9.67917	113.561	14.2625	60.0107	59.9971	99.8562
9.6875	113.646	14.2625	60.0186	60.0338	99.8565
9.69583	113.729	14.2626	59.9782	59.9749	99.8569
9.70417	113.812	14.2627	60.0249	60.0019	99.8576
9.7125	113.895	14.2627	59.9811	59.9707	99.8581
9.72083	113.977	14.2627	60.0127	60.0014	99.8579
9.72917	114.062	14.2627	59.9767	60.0122	99.858
9.7375	114.146	14.2628	59.9865	60.0194	99.8584
9.74583	114.23	14.2628	60.0193	59.9912	99.8586
9.75417	114.315	14.2628	59.981	59.979	99.8583
9.7625	114.396	14.2628	60.0099	60.0183	99.8583
9.77083	114.48	14.2627	59.9985	59.9992	99.858
9.77917	114.562	14.2626	60.0068	59.9977	99.857
9.7875	114.649	14.2625	60.0007	60.0157	99.8567
9.79583	114.732	14.2625	60.0009	59.9549	99.8564
9.80417	114.815	14.2624	59.9868	60.0302	99.8561
9.8125	114.897	14.2624	60.0247	60.0095	99.8555
9.82083	114.982	14.2623	59.9889	60.0017	99.8548
9.82917	115.065	14.2622	60.0133	60.0009	99.8546
9.8375	115.15	14.2622	59.979	59.9973	99.8542
9.84583	115.231	14.2621	60.0153	59.958	99.8537
9.85417	115.316	14.2621	59.9955	59.9974	99.8534
9.8625	115.398	14.2621	59.9697	60.0166	99.8533
9.87083	115.483	14.2621	60.0438	60.0231	99.8533
9.87917	115.565	14.2621	59.9936	59.97	99.8537
9.8875	115.648	14.2622	59.9578	60.0072	99.8542
9.89583	115.733	14.2622	60.0347	60.0138	99.8547
9.90417	115.817	14.2622	59.9742	59.9932	99.8545
9.9125	115.899	14.2621	60.0471	60.0255	99.8538
9.92083	115.983	14.262	59.959	59.9714	99.8532
9.92917	116.066	14.2619	60.0275	60.0036	99.8523
9.9375	116.149	14.2619	59.9776	60.0078	99.852
9.94583	116.234	14.2618	59.9797	60.0052	99.8519
9.95417	116.318	14.2619	60.0162	60.016	99.8522
9.9625	116.401	14.2618	60.0188	60.0073	99.8518
9.97083	116.484	14.2617	59.9905	59.9682	99.8509
9.97917	116.568	14.2614	59.9938	60.0134	99.8487
9.9875	116.65	14.2614	60.0208	59.9684	99.8484
9.99583	116.734	14.2613	60.0025	60.0365	99.8484
10.0042	116.816	14.2613	59.9955	59.9808	99.8483
10.0125	116.902	14.2614	59.9894	59.9972	99.8488
10.0208	116.984	14.2615	59.9814	60.0144	99.8495
10.0292	117.068	14.2617	59.9962	60.0022	99.8506
10.0375	117.152	14.262	60.0478	59.9969	99.8526
10.0458	117.236	14.2623	59.9558	59.98	99.8549
10.0542	117.32	14.2626	59.9868	59.9976	99.8569
10.0625	117.403	14.2628	60.0088	60.0095	99.8586
10.0708	117.486	14.263	60.0281	59.9908	99.8598
10.0792	117.57	14.263	59.9671	60.0209	99.8601
10.0875	117.653	14.263	60.0337	59.9876	99.8603
10.0958	117.738	14.263	59.9636	59.9901	99.8598
10.1042	117.823	14.2629	60.0071	60.0065	99.8593
10.1125	117.905	14.2627	60.0221	60.0106	99.8581
10.1208	117.987	14.2625	59.9925	60.0071	99.8564
10.1292	118.071	14.2622	59.9856	60.0025	99.8544
10.1375	118.157	14.2619	60.0247	59.9712	99.8523
10.1458	118.237	14.2617	60.0108	60.0266	99.8506
10.1542	118.321	14.2616	60.0067	59.9742	99.8502
10.1625	118.406	14.2618	59.9642	60.0213	99.8514
10.1708	118.487	14.262	60.0286	59.988	99.8528
10.1792	118.57	14.262	60.0032	59.9834	99.8532
10.1875	118.655	14.262	59.9691	60.0288	99.8528
10.1958	118.738	14.2619	60.0164	59.9964	99.852
10.2042	118.822	14.2619	59.9754	59.9809	99.8522
10.2125	118.905	14.262	59.992	60.0125	99.853
10.2208	118.99	14.2621	60.0166	60.004	99.8535
10.2292	119.073	14.2622	59.9982	60.0019	99.8542
10.2375	119.156	14.2623	60.0095	60.0091	99.8551
10.2458	119.24	14.2623	59.9825	60.0129	99.8551
10.2542	119.324	14.2623	59.9967	59.9932	99.8552
10.2625	119.409	14.2623	59.9976	59.9573	99.8549
10.2708	119.49	14.2623	60.0538	60.0397	99.8548
10.2792	119.574	14.2623	59.9871	59.9882	99.8549
10.2875	119.658	14.2623	59.9855	60.0191	99.855
10.2958	119.742	14.2623	59.9827	59.9775	99.8553
10.3042	119.823	14.2623	60.0286	60.0002	99.855
10.3125	119.908	14.2623	59.9676	60.0149	99.8548
10.3208	119.994	14.2622	60.0008	59.981	99.8547
10.3292	120.075	14.2622	60.0096	60.0026	99.8543
10.3375	120.159	14.2621	59.9898	60.0159	99.8537
10.3458	120.242	14.262	60.0011	59.9865	99.8533
10.3542	120.325	14.262	60.0279	60.0181	99.8528
10.3625	120.409	14.2619	59.9931	59.9979	99.8523
10.3708	120.494	14.2618	59.9774	60.0054	99.8514
10.3792	120.577	14.2617	60.0399	59.9817	99.8508
10.3875	120.662	14.2617	59.9639	60.0121	99.8506
10.3958	120.743	14.2617	60.0062	59.9616	99.8507
10.4042	120.829	14.2617	59.9865	60.0259	99.8509
10.4125	120.909	14.2617	60.0316	60.0288	99.8511
10.4208	120.993	14.2617	59.9796	59.972	99.8512
10.4292	121.076	14.2617	60.0185	59.9825	99.8511
10.4375	121.162	14.2618	60.001	60.0035	99.8516
10.4458	121.244	14.2619	59.9832	60.0394	99.8523
10.4542	121.328	14.2619	60.0232	59.9931	99.8526
10.4625	121.413	14.262	59.9843	59.998	99.8527
10.4708	121.496	14.262	59.9941	59.9927	99.8531
10.4792	121.578	14.262	60.0103	59.9957	99.8528
10.4875	121.663	14.2617	59.9802	59.9741	99.8511
10.4958	121.746	14.2614	59.9985	60.0426	99.849
10.5042	121.829	14.2612	59.9995	59.9828	99.8473
10.5125	121.911	14.261	60.0173	60.0112	99.846
10.5208	121.993	14.2609	59.9814	59.9972	99.8453
10.5292	122.078	14.2608	60.0227	59.9742	99.8449
10.5375	122.163	14.2609	60.0148	60.0281	99.8451
10.5458	122.243	14.2609	59.9663	60.0258	99.8456
10.5542	122.328	14.2609	60.0172	59.9443	99.8454
10.5625	122.414	14.2609	60.0147	60.001	99.845
10.5708	122.495	14.2608	60.0105	59.9996	99.8447
10.5792	122.58	14.2608	59.9843	60.014	99.8449
10.5875	122.664	14.2609	59.9753	59.9964	99.8451
10.5958	122.748	14.261	60.0125	60.0135	99.846
10.6042	122.83	14.2613	59.9899	60.0077	99.8481
10.6125	122.914	14.2615	60.0426	59.9808	99.8498
10.6208	122.996	14.2616	59.9762	59.999	99.8505
10.6292	123.08	14.2616	60.0212	59.9855	99.85
10.6375	123.163	14.2615	59.9915	60.0235	99.8494
10.6458	123.247	14.2615	59.997	59.9768	99.8497
10.6542	123.332	14.2616	59.9803	60.0295	99.8505
10.6625	123.415	14.2617	59.9916	59.9982	99.8509
10.6708	123.498	14.2617	60.0043	59.999	99.8512
10.6792	123.582	14.2619	59.9874	60.0171	99.8521
10.6875	123.666	14.262	60.0114	59.9658	99.8529
10.6958	123.748	14.262	59.994	60.0197	99.853
10.7042	123.834	14.262	60.0523	60.0087	99.8527
10.7125	123.918	14.2618	59.9702	59.9696	99.8519
10.7208	124	14.2617	59.9931	60.0009	99.8507
10.7292	124.084	14.2615	60.0171	60.0127	99.8495
10.7375	124.169	14.2613	59.9814	59.9711	99.8479
10.7458	124.252	14.261	59.9931	60.0266	99.8459
10.7542	124.336	14.2607	60.0408	59.9913	99.8437
10.7625	124.417	14.2608	59.9497	60.0015	99.8444
10.7708	124.502	14.2611	60.0134	60.0149	99.8464
10.7792	124.585	14.2612	59.9958	59.9995	99.8477
10.7875	124.669	14.2615	60.0172	59.995	99.8497
10.7958	124.753	14.2618	59.9814	59.9782	99.8515
10.8042	124.836	14.262	60.0126	60.0246	99.8529
10.8125	124.922	14.262	60.0191	59.9976	99.8533
10.8208	125.005	14.2619	59.9678	59.9855	99.8526
10.8292	125.088	14.2618	60.0209	60.0086	99.8519
10.8375	125.169	14.2618	59.9769	59.9899	99.8516
10.8458	125.255	14.2619	60.0358	60.0051	99.852
10.8542	125.338	14.2619	59.966	60.0462	99.8522
10.8625	125.422	14.2619	59.9921	59.9558	99.8523
10.8708	125.505	14.2618	60.0112	60.0122	99.8514
10.8792	125.591	14.2616	60.004	59.9959	99.8499
10.8875	125.673	14.2614	59.9769	59.9832	99.8491
10.8958	125.757	14.2615	60.0157	60.0216	99.8492
10.9042	125.839	14.2616	60.0333	59.9682	99.8502
10.9125	125.925	14.2617	59.9755	60.0085	99.8507
10.9208	126.006	14.2617	59.9787	59.9836	99.8506
10.9292	126.091	14.2616	60.0413	60.0175	99.8502
10.9375	126.174	14.2614	59.9954	60.0064	99.8487
10.9458	126.258	14.2611	59.9652	60.0025	99.8466
10.9542	126.342	14.261	60.0126	60.0069	99.8462
10.9625	126.428	14.2611	59.9913	59.9799	99.8467
10.9708	126.509	14.2611	59.9897	60.0116	99.8467
10.9792	126.594	14.2611	60.0348	60.0112	99.8467
10.9875	126.677	14.2612	59.9591	60.0098	99.8472
10.9958	126.758	14.2612	60.0503	59.9827	99.8477
11.0042	126.843	14.2613	59.9819	59.9968	99.8478
11.0125	126.925	14.2613	59.9757	59.9958	99.8477
11.0208	127.009	14.2613	60.0225	59.9895	99.8481
11.0292	127.094	14.2614	59.9993	60.0335	99.8489
11.0375	127.177	14.2615	60.0178	59.9956	99.8495
11.0458	127.26	14.2616	59.981	59.9958	99.85
11.0542	127.343	14.2615	59.9862	59.9615	99.8494
11.0625	127.428	14.2613	59.9722	60.0403	99.8481
11.0708	127.51	14.2611	60.062	59.9805	99.8464
11.0792	127.594	14.2609	59.9705	59.999	99.8451
11.0875	127.676	14.2612	60.0278	59.9873	99.8477
11.0958	127.761	14.2614	59.9671	60.0082	99.8488
11.1042	127.843	14.2613	60.2952	60.0138	99.8481
11.1125	127.928	14.2612	60.0152	60.0054	99.8472
11.1208	128.009	14.2613	60.0192	59.9902	99.8479
11.1292	128.093	14.2612	59.965	60.0309	99.8474
11.1375	128.177	14.2612	60.0144	59.9702	99.8471
11.1458	128.261	14.2611	60.0137	60.0009	99.8465
11.1542	128.344	14.261	59.9694	60.0109	99.846
11.1625	128.427	14.261	60.0301	60.0021	99.8461
11.1708	128.512	14.2611	60.0009	59.9974	99.847
11.1792	128.595	14.2612	59.9531	59.9963	99.8474
11.1875	128.679	14.2613	60.0259	60.0243	99.8479
11.1958	128.762	14.2614	59.9972	59.9497	99.8486
11.2042	128.846	14.2612	59.9926	60.0468	99.8474
11.2125	128.928	14.2611	60.0198	59.9969	99.8464
11.2208	129.015	14.2611	59.9992	59.9846	99.8466
11.2292	129.097	14.2611	60.0009	59.9747	99.847
11.2375	129.181	14.2612	59.9827	60.0304	99.8474
11.2458	129.264	14.2612	59.9935	60.0055	99.8475
11.2542	129.348	14.2613	60.0194	60.002	99.8479
11.2625	129.433	14.2614	59.9692	59.9883	99.8488
11.2708	129.516	14.2616	60.0205	60.0006	99.8502
11.2792	129.599	14.262	59.9957	59.9856	99.853
11.2875	129.684	14.2623	59.9885	59.9833	99.855
11.2958	129.767	14.2623	60.0325	60.0239	99.8548
11.3042	129.85	14.262	59.9732	60.003	99.8531
11.3125	129.935	14.2619	60.0124	59.9915	99.8521
11.3208	130.019	14.2616	60.0196	60.0002	99.8502
11.3292	130.102	14.2613	59.9609	59.9933	99.8481
11.3375	130.185	14.2612	60.0275	60.0341	99.8474
11.3458	130.271	14.2612	60.0027	59.9726	99.8476
11.3542	130.353	14.2611	59.9709	60.0149	99.8468
11.3625	130.437	14.2609	60.0133	59.9793	99.8455
11.3708	130.518	14.2605	60.0177	60.0292	99.8424
11.3792	130.601	14.2601	59.9955	59.9788	99.84
11.3875	130.683	14.26	60.0108	59.9975	99.8392
11.3958	130.767	14.2601	60.0053	60.0108	99.8394
11.4042	130.851	14.2602	59.9842	59.9976	99.8401
11.4125	130.934	14.2603	59.9872	60.0058	99.8408
11.4208	131.018	14.2603	60.0265	59.9911	99.8409
11.4292	131.1	14.2605	59.9744	60.0088	99.8421
11.4375	131.183	14.2606	60.0028	59.9881	99.8432
11.4458	131.267	14.2607	60.0115	59.9915	99.8442
11.4542	131.351	14.261	59.9931	60.0155	99.8463
11.4625	131.435	14.2614	60.0098	59.9964	99.8486
11.4708	131.519	14.2616	59.9871	59.9881	99.8503
11.4792	131.602	14.2616	60.027	59.987	99.8505
11.4875	131.685	14.2616	59.983	60.0438	99.8501
11.4958	131.77	14.2615	60.0072	59.9585	99.8492
11.5042	131.852	14.2613	59.9706	60.0357	99.8484
11.5125	131.936	14.2612	60.0151	60.0102	99.8475
11.5208	132.018	14.2611	60.0091	59.9628	99.8467
11.5292	132.101	14.2611	60.0062	60.0336	99.8464
11.5375	132.187	14.2609	59.9915	59.9875	99.8455
11.5458	132.27	14.2608	60.0258	60.015	99.8444
11.5542	132.355	14.2607	59.968	59.9978	99.8442
11.5625	132.437	14.2608	59.9994	59.9688	99.8444
11.5708	132.52	14.2608	60.01	60.0207	99.8445
11.5792	132.604	14.2608	59.9648	59.9993	99.8446
11.5875	132.687	14.2609	60.0162	59.9783	99.8452
11.5958	132.77	14.261	60.0064	60.0151	99.8461
11.6042	132.853	14.2612	60.0075	59.9833	99.8477
11.6125	132.938	14.2614	59.9738	60.0009	99.8491
11.6208	133.021	14.2616	60.006	60.0063	99.8505
11.6292	133.104	14.2617	60.0139	60.0011	99.8511
11.6375	133.19	14.2617	60.0159	60.0091	99.851
11.6458	133.272	14.2616	59.9937	60.0251	99.8501
11.6542	133.356	14.2614	60.0071	59.9764	99.8488
11.6625	133.439	14.2612	59.9838	60.0101	99.8474
11.6708	133.52	14.2611	59.9954	59.9913	99.8469
11.6792	133.604	14.2612	60.0108	59.997	99.8473
11.6875	133.687	14.2612	59.9803	59.9814	99.8477
11.6958	133.771	14.2611	59.988	60.0197	99.847
11.7042	133.855	14.261	60.0494	60.0038	99.8463
11.7125	133.937	14.261	59.966	59.9893	99.8458
11.7208	134.021	14.2608	59.983	60.0155	99.8449
11.7292	134.102	14.2608	60.0309	59.9657	99.8443
11.7375	134.184	14.2607	59.9987	60.0138	99.8438
11.7458	134.267	14.2607	59.9977	60.0085	99.8438
11.7542	134.351	14.2608	59.9917	60.0079	99.8444
11.7625	134.436	14.2607	60.0034	59.9695	99.8442
11.7708	134.517	14.2607	60.0193	60.0054	99.8437
11.7792	134.601	14.2606	59.9824	60.0296	99.8435
11.7875	134.685	14.2607	60.0378	59.9991	99.8436
11.7958	134.769	14.2606	59.9441	59.9914	99.8435
11.8042	134.851	14.2606	59.9923	60.0214	99.8432
11.8125	134.935	14.2606	60.0321	59.9867	99.8432
11.8208	135.017	14.2605	60.0028	59.9689	99.8426
11.8292	135.1	14.2605	59.9928	60.0013	99.8427
11.8375	135.181	14.2606	60.0112	60.0321	99.8429
11.8458	135.266	14.2606	59.9735	59.9825	99.8428
11.8542	135.349	14.2606	60.0056	59.9909	99.8432
11.8625	135.431	14.2607	60.0212	60.0341	99.8438
11.8708	135.515	14.2608	59.9906	59.9993	99.8447
11.8792	135.6	14.261	59.9847	59.9856	99.846
11.8875	135.682	14.2613	60.0114	59.9955	99.8478
11.8958	135.766	14.2616	59.9785	60.013	99.8499
11.9042	135.851	14.2618	60.0057	59.9648	99.8513
11.9125	135.935	14.2619	59.9934	60.0066	99.8524
11.9208	136.018	14.2621	60.0449	60.0286	99.8534
11.9292	136.103	14.262	59.9581	59.9977	99.8531
11.9375	136.185	14.2619	60.0434	59.9945	99.8522
11.9458	136.268	14.2618	60.2432	60.003	99.8516
11.9542	136.352	14.2616	59.9715	59.9911	99.8503
11.9625	136.439	14.2614	59.9727	60.0205	99.849
11.9708	136.52	14.2612	60.0133	60.0025	99.8477
11.9792	136.601	14.2611	60.0273	59.9879	99.8465
11.9875	136.685	14.2609	60.0027	60.0132	99.8453
11.9958	136.768	14.2608	59.9828	59.9792	99.8444
12.0042	136.852	14.2607	60.015	59.9871	99.8437
12.0125	136.934	14.2606	59.984	60.0122	99.8431
12.0208	137.017	14.2604	60.0177	60.0072	99.842
12.0292	137.1	14.2603	59.9755	59.9862	99.8412
12.0375	137.184	14.2601	60.0111	59.9951	99.8399
12.0458	137.268	14.26	59.9826	60.0025	99.839
12.0542	137.349	14.2599	59.9967	60.0086	99.8386
12.0625	137.432	14.2599	60.014	59.9894	99.8385
12.0708	137.514	14.2599	60.0297	60.02	99.8382
12.0792	137.598	14.2598	59.9849	59.9546	99.8376
12.0875	137.679	14.2598	60.0041	60.041	99.8374
12.0958	137.763	14.2598	59.9719	59.9977	99.8372
12.1042	137.843	14.2598	60.0338	59.9945	99.8373
12.1125	137.927	14.2598	59.9637	60.0048	99.8376
12.1208	138.01	14.2599	60.034	59.9843	99.8383
12.1292	138.093	14.26	60.0134	60.0325	99.8392
12.1375	138.174	14.2601	59.9749	59.9943	99.8394
12.1458	138.259	14.2601	60.0102	60.0035	99.8397
12.1542	138.342	14.2601	59.9602	59.9983	99.8399
12.1625	138.426	14.2601	60.038	59.9638	99.8398
12.1708	138.506	14.2602	59.9989	60.0278	99.8407
12.1792	138.59	14.2604	60.0173	60	99.8416
12.1875	138.673	14.2605	60.0015	59.9991	99.8428
12.1958	138.758	14.2608	60.0014	59.9896	99.8443
12.2042	138.84	14.261	59.9672	60.0363	99.8459
12.2125	138.926	14.2612	59.9766	60.002	99.8476
12.2208	139.007	14.2614	60.0518	59.9734	99.8488
12.2292	139.091	14.2614	59.9929	60.0001	99.849
12.2375	139.174	14.2614	59.9751	60.0077	99.8488
12.2458	139.258	14.2613	60.0097	59.9709	99.8481
12.2542	139.341	14.2611	59.9743	60.0194	99.8468
12.2625	139.424	14.2609	60.0134	60.0124	99.8454
12.2708	139.508	14.2607	60.0246	59.9864	99.8437
12.2792	139.592	14.2603	60.0099	60.0028	99.8413
12.2875	139.673	14.26	59.983	59.9875	99.8392
12.2958	139.756	14.2599	59.9999	60.2288	99.838
12.3042	139.839	14.2598	59.9849	59.9886	99.8374
12.3125	139.922	14.2599	59.9932	60.0142	99.838
12.3208	140.004	14.26	60.0272	59.9806	99.8388
12.3292	140.086	14.2601	59.9853	60.0098	99.8396
12.3375	140.169	14.2602	59.9868	59.9985	99.8406
12.3458	140.254	14.2604	59.9919	60.0167	99.8418
12.3542	140.334	14.2605	60.0664	59.9969	99.8427
12.3625	140.416	14.2606	59.9596	60.0144	99.8432
12.3708	140.502	14.2607	60.0179	59.972	99.8437
12.3792	140.586	14.2608	59.985	59.9964	99.8443
12.3875	140.668	14.2609	60.0087	60.0026	99.8451
12.3958	140.752	14.2609	59.9592	60.0154	99.8456
12.4042	140.836	14.2609	60.0215	59.9824	99.8453
12.4125	140.919	14.2608	59.9993	59.9963	99.8447
12.4208	141.001	14.2608	59.9886	60.017	99.8448
12.4292	141.083	14.2609	60.0055	60.0087	99.8453
12.4375	141.167	14.2609	60.0243	60.0079	99.8452
12.4458	141.248	14.2607	60.0213	59.9853	99.8442
12.4542	141.331	14.2606	59.9765	59.9869	99.8434
12.4625	141.416	14.2606	59.9956	60.0208	99.843
12.4708	141.499	14.2606	60.0337	59.9858	99.8433
12.4792	141.582	14.2607	59.9467	59.9973	99.8435
12.4875	141.663	14.2607	60.0399	59.9697	99.8439
12.4958	141.749	14.2607	59.9775	60.0356	99.8442
12.5042	141.834	14.2608	60.0308	60.0011	99.8446
12.5125	141.917	14.2609	59.9503	59.9991	99.8453
12.5208	141.999	14.2609	60.0345	60.004	99.8453
12.5292	142.083	14.2607	59.9678	60.0119	99.8442
12.5375	142.166	14.2606	60.004	59.9972	99.843
12.5458	142.248	14.2604	60.0216	59.9652	99.8418
12.5542	142.331	14.2604	59.9952	60.0224	99.8416
12.5625	142.416	14.2604	59.9889	59.984	99.842
12.5708	142.498	14.2604	59.9988	60.0004	99.842
12.5792	142.581	14.2604	59.9973	60.0186	99.8419
12.5875	142.666	14.2603	60.0104	60.0259	99.8411
12.5958	142.748	14.2602	59.9757	59.9606	99.8407
12.6042	142.832	14.2602	60.0252	60.0033	99.8406
12.6125	142.912	14.2603	59.9898	60.01	99.8409
12.6208	142.996	14.2603	60.0065	59.9976	99.841
12.6292	143.079	14.2602	60.0107	60.0035	99.8406
12.6375	143.161	14.2601	59.9898	59.9969	99.8397
12.6458	143.244	14.2601	60.0125	59.9873	99.8397
12.6542	143.327	14.2601	60.01	60.0217	99.8399
12.6625	143.409	14.2601	59.9538	59.97	99.8394
12.6708	143.494	14.26	60.015	60.0225	99.8392
12.6792	143.576	14.26	60.0265	59.9651	99.8389
12.6875	143.661	14.26	59.9457	60.017	99.8387
12.6958	143.742	14.2599	60.0157	59.9938	99.8385
12.7042	143.826	14.2599	60.0315	60.0075	99.8384
12.7125	143.911	14.2599	59.9618	60.0111	99.8382
12.7208	143.994	14.2599	60.0006	59.9927	99.8383
12.7292	144.077	14.2599	60.0123	60.0142	99.8385
12.7375	144.159	14.26	60.0095	59.954	99.8389
12.7458	144.245	14.2601	60.0181	60.0171	99.8399
12.7542	144.327	14.2604	59.9445	59.9942	99.8416
12.7625	144.411	14.2605	60.0366	60.0016	99.8424
12.7708	144.494	14.2606	59.9884	59.9992	99.8432
12.7792	144.576	14.2608	59.9978	60.0045	99.8444
12.7875	144.659	14.2608	59.9935	60.0353	99.8447
12.7958	144.742	14.2608	59.9966	59.9957	99.8449
12.8042	144.825	14.2608	60.0067	59.9981	99.8445
12.8125	144.911	14.2607	60.023	60.0067	99.8438
12.8208	144.994	14.2606	59.9743	59.9821	99.843
12.8292	145.076	14.2605	60.002	60.0211	99.8426
12.8375	145.16	14.2605	59.9896	59.9898	99.8423
12.8458	145.244	14.2604	60.0211	59.9965	99.8414
12.8542	145.325	14.2602	60.0116	59.9769	99.8404
12.8625	145.409	14.2601	60.0023	60.0241	99.8395
12.8708	145.491	14.26	59.9531	59.9926	99.8388
12.8792	145.574	14.26	60.0688	60.003	99.8389
12.8875	145.657	14.2599	59.9903	59.9838	99.8386
12.8958	145.739	14.2599	59.9801	59.9937	99.8385
12.9042	145.822	14.2598	60.0062	60.0341	99.8376
12.9125	145.907	14.2597	59.9706	59.9997	99.8371
12.9208	145.989	14.2597	60.0037	59.9797	99.8367
12.9292	146.071	14.2597	59.9801	59.9966	99.8368
12.9375	146.155	14.2597	60.024	59.9909	99.8371
12.9458	146.239	14.2598	60.0062	60.0245	99.8376
12.9542	146.321	14.2598	59.981	60.0048	99.8377
12.9625	146.404	14.26	60.0168	59.992	99.839
12.9708	146.487	14.2602	59.9941	59.9952	99.8404
12.9792	146.572	14.2604	60.0359	60.0035	99.8414
12.9875	146.656	14.2606	59.9514	60.0191	99.8428
12.9958	146.739	14.2606	60.0245	59.9807	99.8435
13.0042	146.821	14.2607	60.0035	59.9804	99.8439
13.0125	146.906	14.2607	60.0097	60.0075	99.8439
13.0208	146.987	14.2607	60.014	60.0278	99.8438
13.0292	147.073	14.2606	60.0041	59.9841	99.8433
13.0375	147.152	14.2605	59.9614	59.9715	99.8427
13.0458	147.239	14.2605	60.002	60.0104	99.8424
13.0542	147.322	14.2605	60.022	60.0469	99.8423
13.0625	147.404	14.2604	59.9838	59.9599	99.842
13.0708	147.486	14.2603	60.0159	60.029	99.8411
13.0792	147.571	14.2602	60.0023	60	99.8404
13.0875	147.653	14.2601	60.0028	59.9639	99.8399
13.0958	147.735	14.26	59.9973	60.0029	99.8391
13.1042	147.818	14.26	59.9958	60.0172	99.8387
13.1125	147.901	14.26	59.9898	59.9956	99.8388
13.1208	147.983	14.2601	60.0061	60.0053	99.8394
13.1292	148.067	14.2601	60.0267	60.0214	99.8397
13.1375	148.152	14.2602	59.9926	59.9758	99.8402
13.1458	148.236	14.2601	59.9916	60.0155	99.8395
13.1542	148.319	14.2601	59.9984	59.986	99.8397
13.1625	148.401	14.2602	60.0296	60.024	99.8406
13.1708	148.485	14.2603	59.9676	59.9637	99.8412
13.1792	148.568	14.2603	59.9926	60.0323	99.8408
13.1875	148.65	14.2601	59.9783	59.9884	99.84
13.1958	148.733	14.2601	60.0637	60.0195	99.8396
13.2042	148.816	14.26	59.9623	59.9735	99.8389
13.2125	148.898	14.2599	60.0918	60.0177	99.838
13.2208	148.982	14.2597	59.9058	59.9667	99.8368
13.2292	149.062	14.2596	60.0053	59.9918	99.8364
13.2375	149.145	14.2596	60.0248	60.0305	99.8358
13.2458	149.228	14.2595	59.9729	59.9906	99.8355
13.2542	149.311	14.2596	59.9937	60.0087	99.836
13.2625	149.393	14.2596	59.977	59.9854	99.8364
13.2708	149.476	14.2597	60.0016	60.0176	99.8367
13.2792	149.558	14.2597	60.0119	60.0123	99.8366
13.2875	149.642	14.2596	60.0004	59.9778	99.8362
13.2958	149.72	14.2596	60.0206	59.9952	99.836
13.3042	149.802	14.2596	60.0212	60.0301	99.8359
13.3125	149.888	14.2596	59.9897	59.9788	99.8364
13.3208	149.969	14.2598	59.9874	59.9953	99.8372
13.3292	150.052	14.2599	60.016	60.0057	99.8385
13.3375	150.135	14.2601	60.0069	60.0183	99.8397
13.3458	150.22	14.2602	59.9587	59.9961	99.8402
13.3542	150.303	14.2602	60.0033	59.9823	99.8402
13.3625	150.384	14.2601	60.0339	60.0288	99.8395
13.3708	150.468	14.2598	59.9518	60.009	99.8378
13.3792	150.549	14.2597	60.0382	59.9623	99.8368
13.3875	150.633	14.2597	59.988	59.9979	99.8366
13.3958	150.714	14.2596	59.9631	59.9805	99.8364
13.4042	150.798	14.2596	60.0248	60.0152	99.8364
13.4125	150.88	14.2596	59.9885	59.9905	99.836
13.4208	150.96	14.2595	60.0334	60.0291	99.8357
13.4292	151.043	14.2595	59.9682	59.9657	99.8353
13.4375	151.128	14.2596	60.0063	60.0134	99.8358
13.4458	151.213	14.2596	60.0216	59.9928	99.8363
13.4542	151.294	14.2597	60.0085	60.0187	99.8371
13.4625	151.377	14.2598	59.9697	59.9834	99.8376
13.4708	151.459	14.2598	60.0415	60.0157	99.8376
13.4792	151.542	14.2597	59.9967	59.977	99.8371
13.4875	151.626	14.2597	59.9333	60.0291	99.8365
13.4958	151.71	14.2596	60.0189	59.9729	99.8363
13.5042	151.792	14.2596	60.0079	60.0082	99.8363
13.5125	151.878	14.2598	60.04	60.0012	99.8372
13.5208	151.958	14.2598	59.9798	59.9951	99.8378
13.5292	152.042	14.2599	59.993	60.0116	99.838
13.5375	152.125	14.2598	59.9815	60.0157	99.8378
13.5458	152.208	14.2599	60.0831	59.9933	99.8383
13.5542	152.292	14.2601	59.9445	59.9898	99.8395
13.5625	152.374	14.2602	60.0019	59.9988	99.8402
13.5708	152.459	14.2602	59.9955	59.9918	99.8401
13.5792	152.542	14.2601	59.962	60.0151	99.8395
13.5875	152.625	14.2601	60.0285	59.995	99.8395
13.5958	152.71	14.26	59.974	60.0084	99.8393
13.6042	152.792	14.2601	60.0366	59.9926	99.8395
13.6125	152.874	14.2601	59.9624	59.9844	99.8398
13.6208	152.96	14.2602	60.0089	59.9973	99.8404
13.6292	153.042	14.2602	60.0286	60.0013	99.8407
13.6375	153.129	14.2602	59.9512	60.0073	99.8407
13.6458	153.21	14.2602	60.0354	60.0237	99.8404
13.6542	153.295	14.2601	59.9956	59.9732	99.8399
13.6625	153.379	14.26	60.0263	60.0082	99.8391
13.6708	153.461	14.2599	59.9579	60.0088	99.8381
13.6792	153.547	14.2598	60.0434	59.9732	99.8376
13.6875	153.631	14.2598	59.9817	60.0213	99.8374
13.6958	153.712	14.2598	59.9607	60.0034	99.8373
13.7042	153.796	14.2597	60.0243	59.9983	99.8367
13.7125	153.879	14.2596	59.998	59.9968	99.8364
13.7208	153.962	14.2596	59.9926	59.9994	99.836
13.7292	154.045	14.2595	59.9975	59.9779	99.8357
13.7375	154.13	14.2596	60.0018	60.0223	99.8358
13.7458	154.21	14.2596	60.0092	59.9894	99.8364
13.7542	154.293	14.2597	60.0181	60.02	99.8371
13.7625	154.378	14.2598	60.0092	59.9866	99.8375
13.7708	154.463	14.2598	59.9716	60.0136	99.8376
13.7792	154.547	14.2598	60.0452	60.0063	99.8375
13.7875	154.63	14.2598	59.9649	59.9799	99.8372
13.7958	154.713	14.2598	60.0355	60.013	99.8372
13.8042	154.793	14.2597	59.9723	59.9751	99.8369
13.8125	154.88	14.2597	60.0019	59.9848	99.8367
13.8208	154.963	14.2597	60.0037	60.0244	99.8368
13.8292	155.047	14.2597	60.2703	60.0102	99.8371
13.8375	155.129	14.2597	59.986	59.9741	99.8371
13.8458	155.212	14.2597	59.9553	60.0213	99.8368
13.8542	155.294	14.2597	60.0255	59.998	99.8367
13.8625	155.378	14.2597	59.9803	59.99	99.8366
13.8708	155.462	14.2597	60.0222	60.0078	99.8368
13.8792	155.545	14.2597	60.0139	60.0066	99.8368
13.8875	155.63	14.2597	59.9891	59.9709	99.8369
13.8958	155.713	14.2598	60.0179	60.0239	99.8373
13.9042	155.796	14.2597	59.9782	59.9858	99.8371
13.9125	155.879	14.2597	59.9829	59.9946	99.8367
13.9208	155.962	14.2596	60.0341	60.0089	99.8363
13.9292	156.047	14.2596	59.9737	59.9998	99.836
13.9375	156.129	14.2596	60.0275	60.0343	99.8364
13.9458	156.214	14.2597	59.9785	59.9929	99.8368
13.9542	156.297	14.2597	60.0071	59.9939	99.8369
13.9625	156.38	14.2598	59.9989	60.0061	99.8373
13.9708	156.462	14.2598	60.0119	59.9848	99.8376
13.9792	156.546	14.2598	59.9716	59.9986	99.8377
13.9875	156.629	14.2598	59.9932	59.99	99.8378
13.9958	156.711	14.2599	60.0226	59.9821	99.838
14.0042	156.795	14.2599	59.9834	60.0279	99.8381
14.0125	156.879	14.2599	59.9776	59.9968	99.838
14.0208	156.961	14.2598	60.049	60.0148	99.8378
14.0292	157.045	14.2598	59.9992	59.9932	99.8374
14.0375	157.129	14.2597	59.9881	59.9862	99.8369
14.0458	157.212	14.2598	59.9613	60.0086	99.8374
14.0542	157.295	14.2598	60.0129	59.9939	99.8376
14.0625	157.379	14.2598	60.0319	60.0043	99.8375
14.0708	157.463	14.2599	60.0147	59.9897	99.838
14.0792	157.546	14.2599	59.9736	60.0024	99.838
14.0875	157.629	14.2598	59.9978	59.9933	99.8376
14.0958	157.714	14.2597	59.9876	60.03	99.8371
14.1042	157.796	14.2597	60.0069	60.0041	99.8369
14.1125	157.88	14.2597	60.023	59.9803	99.8371
14.1208	157.961	14.2597	59.9711	60.0156	99.8367
14.1292	158.046	14.2597	59.9772	59.9653	99.8367
14.1375	158.129	14.2597	60.0599	60.0481	99.8366
14.1458	158.214	14.2597	59.9713	59.9997	99.8367
14.1542	158.295	14.2597	60.0352	60	99.8367
14.1625	158.378	14.2596	59.971	59.9747	99.8363
14.1708	158.46	14.2596	60.0219	59.987	99.8358
14.1792	158.543	14.2595	60.0016	59.9946	99.8354
14.1875	158.625	14.2594	59.9622	60.0314	99.8349
14.1958	158.71	14.2594	60.0385	59.9856	99.8346
14.2042	158.794	14.2594	59.9784	59.9964	99.8346
14.2125	158.878	14.2594	60.0016	60.0229	99.8351
14.2208	158.961	14.2595	60.0201	59.9994	99.8355
14.2292	159.043	14.2595	59.9641	59.9747	99.8357
14.2375	159.127	14.2595	60.034	60.0069	99.8355
14.2458	159.209	14.2595	59.9582	59.993	99.8353
14.2542	159.293	14.2595	60.027	60.0011	99.8353
14.2625	159.375	14.2594	60.0251	60.0118	99.8348
14.2708	159.458	14.2594	59.9821	60.0266	99.8347
14.2792	159.541	14.2594	60.0118	59.9999	99.8346
14.2875	159.626	14.2594	60.0154	59.9693	99.8345
14.2958	159.71	14.2594	59.9909	59.9846	99.8346
14.3042	159.794	14.2593	59.9938	60.0388	99.8343
14.3125	159.876	14.2593	59.9834	59.9836	99.8343
14.3208	159.959	14.2593	59.9881	60.0031	99.8341
14.3292	160.041	14.2594	60.0097	59.9816	99.8345
14.3375	160.124	14.2594	60.0199	59.9841	99.835
14.3458	160.209	14.2595	59.9742	60.0171	99.8357
14.3542	160.292	14.2596	60.0115	59.9987	99.8364
14.3625	160.376	14.2597	59.9926	59.9986	99.837
14.3708	160.459	14.2598	59.9879	60.018	99.8376
14.3792	160.542	14.2599	60.0252	59.9897	99.8379
14.3875	160.623	14.2599	59.9889	60.0096	99.8385
14.3958	160.708	14.26	59.9691	60.0238	99.8391
14.4042	160.792	14.26	60.031	59.9994	99.839
14.4125	160.875	14.2599	59.9891	59.9828	99.8386
14.4208	160.958	14.2599	60.0083	60.0013	99.8384
14.4292	161.042	14.2599	59.9921	59.9974	99.8383
14.4375	161.123	14.2599	59.9947	59.9855	99.838
14.4458	161.208	14.2598	60.0172	60.0176	99.8373
14.4542	161.292	14.2597	60.0097	59.9807	99.8366
14.4625	161.373	14.2596	59.9939	60.041	99.8362
14.4708	161.458	14.2595	60.0267	59.9769	99.8355
14.4792	161.54	14.2594	59.9589	60.0097	99.835
14.4875	161.625	14.2594	60.0023	59.999	99.8349
14.4958	161.708	14.2593	60.0389	59.9756	99.8344
14.5042	161.789	14.2593	59.9866	60.0069	99.834
14.5125	161.875	14.2592	60.0659	60.0124	99.8336
14.5208	161.958	14.2592	59.933	60.0027	99.8334
14.5292	162.039	14.2592	60.0025	60.01	99.8334
14.5375	162.124	14.2592	60.0015	59.9832	99.8332
14.5458	162.206	14.2592	59.9914	59.9913	99.8336
14.5542	162.29	14.2593	60.0011	60.011	99.8339
14.5625	162.369	14.2593	59.9695	59.9949	99.8339
14.5708	162.454	14.2592	59.9845	59.9976	99.8336
14.5792	162.537	14.2592	60.0438	60.0036	99.8332
14.5875	162.621	14.2592	59.9813	60.029	99.8332
14.5958	162.704	14.2592	60.0017	59.9666	99.8332
14.6042	162.788	14.2592	59.9764	60.0035	99.8334
14.6125	162.871	14.2592	60.0595	60.0051	99.8333
14.6208	162.955	14.2592	59.9663	59.9767	99.8332
14.6292	163.037	14.2591	59.9862	60.007	99.8329
14.6375	163.121	14.2591	60.0228	59.9948	99.833
14.6458	163.204	14.2591	59.9761	60.0071	99.8328
14.6542	163.286	14.2591	60.0006	59.9813	99.8328
14.6625	163.369	14.2591	60.0343	60.0346	99.8327
14.6708	163.451	14.2591	59.976	59.9636	99.8329
14.6792	163.535	14.2592	60.0107	60.0467	99.8334
14.6875	163.619	14.2592	60.0076	59.987	99.8336
14.6958	163.702	14.2592	59.956	60.0077	99.8335
14.7042	163.785	14.2592	60.0064	59.9817	99.8336
14.7125	163.867	14.2593	60.0129	59.9976	99.8338
14.7208	163.95	14.2593	59.9836	60.0148	99.834
14.7292	164.032	14.2593	60.0423	59.9783	99.8341
14.7375	164.117	14.2593	59.9854	59.9989	99.8341
14.7458	164.199	14.2593	60.0123	60.0131	99.8341
14.7542	164.281	14.2593	60.0118	59.9896	99.8341
14.7625	164.366	14.2593	60.005	60.006	99.8338
14.7708	164.45	14.2592	59.9518	59.9758	99.8337
14.7792	164.534	14.2592	60.0277	60.0345	99.8332
14.7875	164.617	14.2592	60.0013	60.007	99.8332
14.7958	164.701	14.2592	59.9827	60.0125	99.8331
14.8042	164.782	14.2591	59.9995	59.9651	99.8329
14.8125	164.865	14.2591	59.9772	60.0225	99.8327
14.8208	164.946	14.2591	60.028	59.9836	99.8326
14.8292	165.03	14.259	60.0032	60.0067	99.832
14.8375	165.115	14.2589	60.022	59.9628	99.8315
14.8458	165.197	14.2589	60.002	60.0408	99.8312
14.8542	165.282	14.2588	60.0249	60.0053	99.8306
14.8625	165.363	14.2588	59.9263	59.9929	99.8305
14.8708	165.446	14.2587	60.0392	59.9957	99.8301
14.8792	165.53	14.2587	60.0072	60.0184	99.8302
14.8875	165.615	14.2589	59.9542	59.9663	99.8311
14.8958	165.697	14.259	60.0332	59.9985	99.8319
14.9042	165.78	14.2591	60.0029	59.9882	99.8329
14.9125	165.862	14.2593	59.9718	60.02	99.8343
14.9208	165.946	14.2595	59.9927	59.9654	99.8357
14.9292	166.029	14.2596	60.0226	60.0215	99.8364
14.9375	166.113	14.2598	60.0044	60.0219	99.8374
14.9458	166.196	14.2598	60.0193	59.9763	99.8374
14.9542	166.279	14.2597	59.9409	60.0214	99.837
14.9625	166.361	14.2596	60.0255	59.9921	99.8362
14.9708	166.446	14.2594	59.9962	59.9849	99.8349
14.9792	166.53	14.2593	60.0049	60.0099	99.8342
14.9875	166.611	14.2592	60.0011	60.0066	99.8337
14.9958	166.694	14.2592	60.0165	59.9925	99.8332
15.0042	166.779	14.2592	59.9886	60.0025	99.8331
15.0125	166.861	14.2591	59.9586	60.0172	99.8325
15.0208	166.944	14.259	60.0397	59.9893	99.8316
15.0292	167.028	14.2589	59.999	59.9771	99.8314
15.0375	167.111	14.2589	60.0009	60.0083	99.8315
15.0458	167.194	14.259	60.0055	59.9975	99.8317
15.0542	167.278	14.2591	60.0024	60.0094	99.8323
15.0625	167.363	14.2591	60.0119	60.0215	99.8325
15.0708	167.444	14.2591	60.0054	59.9849	99.8325
15.0792	167.528	14.259	59.9846	59.9909	99.8318
15.0875	167.61	14.2589	60.0118	60.0137	99.831
15.0958	167.692	14.2588	59.9771	59.9991	99.8308
15.1042	167.777	14.2589	60.0395	60.0113	99.8314
15.1125	167.861	14.259	59.9542	59.976	99.8321
15.1208	167.944	14.2591	60.0077	60.0187	99.8327
15.1292	168.027	14.2592	60.0057	59.9789	99.8336
15.1375	168.11	14.2593	59.9842	60.0052	99.8338
15.1458	168.194	14.2593	60.0374	60.0142	99.8342
15.1542	168.278	14.2594	59.993	59.9941	99.8348
15.1625	168.361	14.2594	59.9537	59.9917	99.8348
15.1708	168.444	14.2594	60.0063	59.9871	99.8347
15.1792	168.528	14.2594	59.9993	60.0339	99.8348
15.1875	168.611	14.2594	60.0041	59.9708	99.8349
15.1958	168.693	14.2595	60.0302	60.0144	99.8352
15.2042	168.777	14.2595	60.0105	59.9792	99.8352
15.2125	168.86	14.2594	59.9857	60.0038	99.8346
15.2208	168.944	14.2593	59.9649	60.0137	99.8339
15.2292	169.028	14.2593	60.0418	60.004	99.8339
15.2375	169.112	14.2592	59.9977	60.001	99.8336
15.2458	169.195	14.2591	60.0063	59.9978	99.833
15.2542	169.276	14.259	60.0207	60.0112	99.8322
15.2625	169.362	14.259	59.9669	59.9922	99.8321
15.2708	169.446	14.259	60.0127	59.9894	99.8321
15.2792	169.526	14.259	59.9731	60.0241	99.832
15.2875	169.609	14.2589	60.0234	59.9953	99.8311
15.2958	169.692	14.2588	59.9934	60.0243	99.8308
15.3042	169.773	14.2588	60.0711	59.9718	99.8307
15.3125	169.86	14.2588	59.9085	59.9833	99.8304
15.3208	169.94	14.2588	60.0145	59.9927	99.8308
15.3292	170.025	14.2589	60.0073	60.0002	99.8311
15.3375	170.108	14.259	59.9646	60.0257	99.8317
15.3458	170.192	14.2591	60.0103	60.013	99.8327
15.3542	170.274	14.2592	60.0031	59.9787	99.8331
15.3625	170.357	14.2592	60.033	60.0129	99.8331
15.3708	170.442	14.2592	59.9892	59.986	99.8335
15.3792	170.526	14.2593	59.9691	60.0303	99.8339
15.3875	170.608	14.2592	60.0296	59.9847	99.8336
15.3958	170.693	14.2592	59.9567	59.9973	99.8336
15.4042	170.777	14.2593	60.0511	60.0058	99.834
15.4125	170.858	14.2593	59.9979	59.9875	99.8343
15.4208	170.942	14.2594	59.9876	59.9802	99.8346
15.4292	171.025	14.2594	59.985	60.0174	99.8347
15.4375	171.108	14.2593	60.042	60.0209	99.8341
15.4458	171.189	14.2592	60.0059	59.9988	99.8334
15.4542	171.273	14.2591	59.9938	60.0135	99.8329
15.4625	171.356	14.2591	59.9774	59.9589	99.8328
15.4708	171.441	14.2591	60.0239	60.0032	99.8327
15.4792	171.524	14.259	60.0026	60.0159	99.8322
15.4875	171.605	14.2589	59.9731	59.9883	99.8315
15.4958	171.69	14.2588	60.0165	60.001	99.8304
15.5042	171.774	14.2587	59.9668	60.0122	99.8297
15.5125	171.856	14.2587	60.0272	59.9936	99.8298
15.5208	171.938	14.2587	59.9885	59.993	99.8299
15.5292	172.023	14.2587	60.0046	59.9867	99.83
15.5375	172.104	14.2588	59.9842	60.005	99.8303
15.5458	172.189	14.2588	60.0182	60.0096	99.8306
15.5542	172.273	14.2589	59.9883	60.0093	99.8311
15.5625	172.354	14.259	60.0224	60.0089	99.8318
15.5708	172.438	14.2591	60.0121	60.0043	99.8325
15.5792	172.523	14.2591	59.9657	59.9897	99.8329
15.5875	172.605	14.2592	60.009	59.9866	99.8332
15.5958	172.688	14.2592	60.0062	59.9905	99.8334
15.6042	172.773	14.2592	60.1819	60.0178	99.8333
15.6125	172.856	14.2591	60.0029	59.9707	99.8325
15.6208	172.939	14.259	60.0005	60.0433	99.832
15.6292	173.024	14.2589	60.0333	59.9616	99.8315
15.6375	173.105	14.2589	59.954	60.0526	99.8314
15.6458	173.187	14.2589	60.0196	59.9646	99.8313
15.6542	173.27	14.2589	60.0134	59.9772	99.8313
15.6625	173.354	14.2589	59.9516	60.0349	99.8315
15.6708	173.436	14.259	60.0199	59.9862	99.832
15.6792	173.52	14.2591	60.0121	60.0222	99.8324
15.6875	173.604	14.2591	59.9794	59.9998	99.833
15.6958	173.687	14.2592	59.9948	59.9991	99.8334
15.7042	173.77	14.2592	60.0418	60.0135	99.8334
15.7125	173.856	14.259	59.952	59.9638	99.8321
15.7208	173.937	14.2588	60.0459	60.0074	99.8306
15.7292	174.021	14.2586	59.9991	59.988	99.8294
15.7375	174.102	14.2586	59.9986	59.9969	99.8292
15.7458	174.187	14.2587	59.9671	60.0338	99.83
15.7542	174.269	14.2589	60.0141	59.9898	99.8311
15.7625	174.352	14.259	59.9909	60.0051	99.8318
15.7708	174.435	14.259	60.0303	59.9771	99.8317
15.7792	174.52	14.259	59.9695	60.0191	99.832
15.7875	174.604	14.259	59.9762	59.9907	99.832
15.7958	174.687	14.2591	60.0348	60.0155	99.8328
15.8042	174.77	14.2592	59.971	59.9734	99.8331
15.8125	174.852	14.259	60.0242	60.0312	99.8316
15.8208	174.935	14.2588	60.0213	59.996	99.8305
15.8292	175.019	14.2587	59.9564	59.9949	99.83
15.8375	175.102	14.2587	60.0315	59.9809	99.8299
15.8458	175.184	14.2587	60.0051	60.0224	99.8296
15.8542	175.268	14.2586	60.0093	59.9714	99.829
15.8625	175.351	14.2585	59.9953	60.0294	99.8285
15.8708	175.434	14.2584	59.9784	59.9621	99.8276
15.8792	175.517	14.2585	60.0181	59.9952	99.8283
15.8875	175.602	14.2586	60.001	59.9836	99.829
15.8958	175.685	14.2585	60.0069	60.0256	99.8284
15.9042	175.767	14.2585	59.9623	60.0207	99.8283
15.9125	175.849	14.2585	60.0089	59.9817	99.8285
15.9208	175.933	14.2586	59.9921	60.0252	99.8291
15.9292	176.018	14.2587	60.0335	59.9963	99.8297
15.9375	176.099	14.2587	59.9723	60.0094	99.8296
15.9458	176.184	14.2586	60.006	59.9985	99.8294
15.9542	176.268	14.2586	59.9815	59.976	99.8292
15.9625	176.35	14.2585	60.0035	60.0042	99.8287
15.9708	176.433	14.2584	60.0111	59.9925	99.8277
15.9792	176.517	14.2582	60.0231	59.993	99.8266
15.9875	176.598	14.2582	59.9752	60.0287	99.8266
15.9958	176.682	14.2583	60.0079	59.9838	99.8268
16.0042	176.767	14.2583	60.0053	60.0311	99.8271
16.0125	176.851	14.2584	59.9714	59.9874	99.8278
16.0208	176.931	14.2585	60.0434	60.001	99.8286
16.0292	177.015	14.2586	59.9909	59.9897	99.829
16.0375	177.097	14.2586	60.0175	60.0042	99.8289
16.0458	177.18	14.2585	59.955	60.0088	99.8287
16.0542	177.264	14.2585	60.0296	59.9809	99.8285
16.0625	177.349	14.2585	59.9877	60.0111	99.8285
16.0708	177.431	14.2585	59.975	59.9755	99.8283
16.0792	177.515	14.2585	60.0572	60.0308	99.8283
16.0875	177.596	14.2584	59.9789	59.9928	99.828
16.0958	177.68	14.2585	60.0094	60.0211	99.8282
16.1042	177.765	14.2585	59.982	59.9672	99.8285
16.1125	177.848	14.2585	59.9912	59.9909	99.8285
16.1208	177.929	14.2585	60.0139	60.0092	99.8288
16.1292	178.014	14.2586	60.0278	59.9944	99.8292
16.1375	178.098	14.2587	59.958	59.989	99.8297
16.1458	178.181	14.2588	60.0329	60.0236	99.8307
16.1542	178.265	14.259	59.9768	59.9976	99.832
16.1625	178.348	14.2592	59.9861	60.0085	99.8336
16.1708	178.432	14.2594	60.0096	60.0021	99.8349
16.1792	178.515	14.2595	59.9925	60.024	99.8357
16.1875	178.599	14.2596	60.0057	59.9894	99.8364
16.1958	178.683	14.2597	59.9728	59.9567	99.837
16.2042	178.766	14.2597	60.0233	60.0397	99.8371
16.2125	178.852	14.2597	60.0436	59.994	99.8366
16.2208	178.935	14.2595	59.9662	59.9826	99.8355
16.2292	179.017	14.2593	59.9866	60.0027	99.8341
16.2375	179.101	14.2591	60.0133	60.0087	99.8329
16.2458	179.183	14.259	59.9881	60.0048	99.8318
16.2542	179.268	14.2588	60.0434	59.9722	99.8308
16.2625	179.351	14.2587	59.9813	60.038	99.8299
16.2708	179.434	14.2586	59.9656	59.9926	99.8292
16.2792	179.517	14.2585	60.0035	60.0115	99.8286
16.2875	179.6	14.2584	59.9983	59.9728	99.8277
16.2958	179.684	14.2584	59.9991	60.0046	99.8278
16.3042	179.765	14.2584	59.9881	60.0006	99.8279
16.3125	179.849	14.2583	60.043	60.0005	99.8273
[truncated: 8,589 more rows]
